# Supplementary material
Source: publisher figshare collection journal article supplement (https://acs.figshare.com/ndownloader/files/4597636)
Supplement: Supplementary file 1 [file 4597636]

 
data_jrp91ag 
 
_audit_creation_method            SHELXL-97 
_chemical_name_systematic 
; 
 ? 
; 
_chemical_name_common             ? 
_chemical_melting_point           ? 
_chemical_formula_moiety          ? 
_chemical_formula_sum 
 'C95.80 H109.40 Ag4 B4 F16 N20.20 O5' 
_chemical_formula_weight          2402.56 
 
loop_ 
 _atom_type_symbol 
 _atom_type_description 
 _atom_type_scat_dispersion_real 
 _atom_type_scat_dispersion_imag 
 _atom_type_scat_source 
 'C'  'C'   0.0033   0.0016 
 'International Tables Vol C Tables 4.2.6.8 and 6.1.1.4' 
 'H'  'H'   0.0000   0.0000 
 'International Tables Vol C Tables 4.2.6.8 and 6.1.1.4' 
 'B'  'B'   0.0013   0.0007 
 'International Tables Vol C Tables 4.2.6.8 and 6.1.1.4' 
 'N'  'N'   0.0061   0.0033 
 'International Tables Vol C Tables 4.2.6.8 and 6.1.1.4' 
 'O'  'O'   0.0106   0.0060 
 'International Tables Vol C Tables 4.2.6.8 and 6.1.1.4' 
 'F'  'F'   0.0171   0.0103 
 'International Tables Vol C Tables 4.2.6.8 and 6.1.1.4' 
 'Ag'  'Ag'  -0.8971   1.1015 
 'International Tables Vol C Tables 4.2.6.8 and 6.1.1.4' 
 
_symmetry_cell_setting            triclinic 
_symmetry_space_group_name_H-M   'P -1' 
 
loop_ 
 _symmetry_equiv_pos_as_xyz 
 'x, y, z' 
 '-x, -y, -z' 
 
_cell_length_a                    13.6114(6) 
_cell_length_b                    18.7137(8) 
_cell_length_c                    21.0146(9) 
_cell_angle_alpha                 78.652(2) 
_cell_angle_beta                  85.772(2) 
_cell_angle_gamma                 81.763(2) 
_cell_volume                      5188.3(4) 
_cell_formula_units_Z             2 
_cell_measurement_temperature     83(2) 
_cell_measurement_reflns_used     ? 
_cell_measurement_theta_min       ? 
_cell_measurement_theta_max       ? 
 
_exptl_crystal_description        block 
_exptl_crystal_colour             orange 
_exptl_crystal_size_max           0.16 
_exptl_crystal_size_mid           0.14 
_exptl_crystal_size_min           0.04 
_exptl_crystal_density_meas       ? 
_exptl_crystal_density_diffrn     1.552 
_exptl_crystal_density_method     'not measured' 
_exptl_crystal_F_000              2435 
_exptl_absorpt_coefficient_mu     0.834 
_exptl_absorpt_correction_type    'multi-scan'
_exptl_absorpt_correction_T_min   0.801 
_exptl_absorpt_correction_T_max   1.000 
_exptl_absorpt_process_details    'SCALE (Bruker AXS Inc.)' 
 
_exptl_special_details 
; 
 ? 
; 
 
_diffrn_ambient_temperature       83(2) 
_diffrn_radiation_wavelength      0.71073 
_diffrn_radiation_type            MoK\a 
_diffrn_radiation_source          'fine-focus sealed tube' 
_diffrn_radiation_monochromator   graphite 
_diffrn_measurement_device_type   'Bruker Apex II area detector' 
_diffrn_measurement_method        'CCD area detector' 
_diffrn_detector_area_resol_mean  ? 
_diffrn_standards_number          ? 
_diffrn_standards_interval_count  ? 
_diffrn_standards_interval_time   ? 
_diffrn_standards_decay_%         ? 
_diffrn_reflns_number             115563 
_diffrn_reflns_av_R_equivalents   0.1125 
_diffrn_reflns_av_sigmaI/netI     0.1011 
_diffrn_reflns_limit_h_min        -16 
_diffrn_reflns_limit_h_max        16 
_diffrn_reflns_limit_k_min        -23 
_diffrn_reflns_limit_k_max        23 
_diffrn_reflns_limit_l_min        -25 
_diffrn_reflns_limit_l_max        25 
_diffrn_reflns_theta_min          0.99 
_diffrn_reflns_theta_max          26.00 
_reflns_number_total              20363 
_reflns_number_gt                 12502 
_reflns_threshold_expression      >2sigma(I) 
 
_computing_data_collection        ? 
_computing_cell_refinement        ? 
_computing_data_reduction         ? 
_computing_structure_solution     'SHELXS-97 (Sheldrick, 1990)' 
_computing_structure_refinement   'SHELXL-97 (Sheldrick, 1997)' 
_computing_molecular_graphics     ? 
_computing_publication_material   ? 
 
_refine_special_details 
; 
 Refinement of F^2^ against ALL reflections.  The weighted R-factor wR and 
 goodness of fit S are based on F^2^, conventional R-factors R are based 
 on F, with F set to zero for negative F^2^. The threshold expression of 
 F^2^ > 2sigma(F^2^) is used only for calculating R-factors(gt) etc. and is 
 not relevant to the choice of reflections for refinement.  R-factors based 
 on F^2^ are statistically about twice as large as those based on F, and R- 
 factors based on ALL data will be even larger. 


 All non-H ANIS with the exception of any atoms with a site occupancy factor
 of less than 0.5 which were left isotropic. Two BF4- had twirl dissorder around
 the B3-F31 and B4-F41 bonds disorder with the remaining atoms EADP with 
 their opposites and with 75:25 s.o.f. Additionally both disordered BF4- were
 restrained to be the SAME as B1-F14.

 One of the Ph-Me groups on the ligands is disordered over two sites with an 
 occupancy of 80:20, each part is restrained to be FLAT (0.005) and with the 
 lower occupancy part the SAME as the well resolved higher occupancy part.
 Additionally there is a partial occupancy diethyl ether (0.8 s.o.f) in the 
 same  PART as the well resolved 0.8 s.o.f. Ph-Me with a partial occupancy 
 DMF (0.2 s.o.f) in the same PART as the lower occupancy 0.2 s.o.f. 
 Ph-Me  which is also close to a symmetry element and hence close to itself. 

 H atoms inserted at calculated positions and rode on attached atoms.

; 
 
_refine_ls_structure_factor_coef  Fsqd  
_refine_ls_matrix_type            full 
_refine_ls_weighting_scheme       calc  
_refine_ls_weighting_details 
 'calc w=1/[\s^2^(Fo^2^)+(0.0452P)^2^+26.4469P] where P=(Fo^2^+2Fc^2^)/3' 
_atom_sites_solution_primary      direct 
_atom_sites_solution_secondary    difmap 
_atom_sites_solution_hydrogens    geom 
_refine_ls_hydrogen_treatment     constr 
_refine_ls_extinction_method      none 
_refine_ls_extinction_coef        ? 
_refine_ls_number_reflns          20363 
_refine_ls_number_parameters      1394 
_refine_ls_number_restraints      128 
_refine_ls_R_factor_all           0.1275 
_refine_ls_R_factor_gt            0.0652 
_refine_ls_wR_factor_ref          0.1590 
_refine_ls_wR_factor_gt           0.1354 
_refine_ls_goodness_of_fit_ref    1.069 
_refine_ls_restrained_S_all       1.072 
_refine_ls_shift/su_max           0.001 
_refine_ls_shift/su_mean          0.000 
 
loop_ 
 _atom_site_label 
 _atom_site_type_symbol 
 _atom_site_fract_x 
 _atom_site_fract_y 
 _atom_site_fract_z 
 _atom_site_U_iso_or_equiv 
 _atom_site_adp_type 
 _atom_site_occupancy 
 _atom_site_symmetry_multiplicity 
 _atom_site_calc_flag 
 _atom_site_refinement_flags 
 _atom_site_disorder_assembly 
 _atom_site_disorder_group 
Ag1 Ag 0.67841(4) 0.65014(3) -0.30004(3) 0.02685(14) Uani 1 1 d . A . 
Ag2 Ag 0.61625(4) 0.44298(3) -0.24042(3) 0.02872(15) Uani 1 1 d . . . 
Ag3 Ag 0.89180(4) 0.48241(3) -0.25716(3) 0.02679(14) Uani 1 1 d . A . 
Ag4 Ag 0.82980(4) 0.26584(3) -0.23405(3) 0.03205(15) Uani 1 1 d . . . 
N1 N 0.6458(4) 0.5737(3) -0.3680(3) 0.0240(13) Uani 1 1 d . . . 
N2 N 0.6254(4) 0.5051(3) -0.3480(3) 0.0230(13) Uani 1 1 d . . . 
C2 C 0.6047(5) 0.4663(4) -0.3915(3) 0.0224(15) Uani 1 1 d . . . 
C3 C 0.6071(6) 0.4943(4) -0.4577(3) 0.0311(18) Uani 1 1 d . . . 
H3 H 0.5936 0.4660 -0.4881 0.037 Uiso 1 1 calc R . . 
C4 C 0.6298(6) 0.5648(4) -0.4775(4) 0.0328(18) Uani 1 1 d . . . 
H4 H 0.6324 0.5867 -0.5223 0.039 Uiso 1 1 calc R . . 
C5 C 0.6488(5) 0.6031(4) -0.4307(3) 0.0287(17) Uani 1 1 d . . . 
C6 C 0.6742(6) 0.6787(4) -0.4492(4) 0.0363(19) Uani 1 1 d . A . 
H6 H 0.6706 0.7031 -0.4933 0.044 Uiso 1 1 calc R . . 
N3 N 0.7007(5) 0.7118(3) -0.4073(3) 0.0292(14) Uani 1 1 d . . . 
C8 C 0.7129(7) 0.7895(5) -0.4270(4) 0.033(3) Uani 0.80 1 d PD A 1 
C9 C 0.6558(8) 0.8395(5) -0.4718(4) 0.055(3) Uani 0.80 1 d PD A 1 
H9 H 0.5992 0.8258 -0.4878 0.066 Uiso 0.80 1 calc PR A 1 
C10 C 0.6814(9) 0.9100(5) -0.4934(4) 0.075(5) Uani 0.80 1 d PD A 1 
H10 H 0.6420 0.9441 -0.5241 0.090 Uiso 0.80 1 calc PR A 1 
C11 C 0.7638(7) 0.9311(5) -0.4706(4) 0.052(3) Uani 0.80 1 d PD A 1 
C12 C 0.8215(8) 0.8812(5) -0.4256(5) 0.046(3) Uani 0.80 1 d PD A 1 
H12 H 0.8781 0.8951 -0.4096 0.055 Uiso 0.80 1 calc PR A 1 
C13 C 0.7954(7) 0.8107(5) -0.4042(5) 0.040(3) Uani 0.80 1 d PD A 1 
H13 H 0.8348 0.7766 -0.3734 0.048 Uiso 0.80 1 calc PR A 1 
C14 C 0.7893(11) 1.0092(6) -0.4956(5) 0.085(5) Uani 0.80 1 d PD A 1 
H14A H 0.8370 1.0091 -0.5329 0.102 Uiso 0.80 1 calc PR A 1 
H14B H 0.8186 1.0263 -0.4610 0.102 Uiso 0.80 1 calc PR A 1 
H14C H 0.7287 1.0422 -0.5090 0.102 Uiso 0.80 1 calc PR A 1 
O120 O 0.9052(5) 0.9018(3) -0.6364(3) 0.0412(17) Uani 0.80 1 d P B 1 
C121 C 0.9965(8) 0.9092(6) -0.6208(6) 0.050(3) Uani 0.80 1 d P B 1 
H12A H 1.0449 0.8709 -0.6363 0.060 Uiso 0.80 1 calc PR B 1 
H12B H 0.9986 0.9008 -0.5729 0.060 Uiso 0.80 1 calc PR B 1 
C122 C 1.0264(8) 0.9810(6) -0.6480(5) 0.047(3) Uani 0.80 1 d P B 1 
H12C H 1.0247 0.9898 -0.6955 0.056 Uiso 0.80 1 calc PR B 1 
H12D H 1.0940 0.9825 -0.6357 0.056 Uiso 0.80 1 calc PR B 1 
H12E H 0.9806 1.0192 -0.6313 0.056 Uiso 0.80 1 calc PR B 1 
C123 C 0.8757(9) 0.8322(5) -0.6144(7) 0.067(4) Uani 0.80 1 d P B 1 
H12F H 0.8680 0.8225 -0.5664 0.081 Uiso 0.80 1 calc PR B 1 
H12G H 0.9273 0.7941 -0.6274 0.081 Uiso 0.80 1 calc PR B 1 
C124 C 0.7809(10) 0.8285(6) -0.6422(8) 0.074(4) Uani 0.80 1 d P B 1 
H12H H 0.7302 0.8666 -0.6296 0.089 Uiso 0.80 1 calc PR B 1 
H12I H 0.7598 0.7800 -0.6258 0.089 Uiso 0.80 1 calc PR B 1 
H12J H 0.7894 0.8363 -0.6897 0.089 Uiso 0.80 1 calc PR B 1 
C8A C 0.7446(15) 0.7724(14) -0.4249(12) 0.019(12) Uiso 0.20 1 d PD A 2 
C9A C 0.7522(15) 0.8093(11) -0.4886(11) 0.013(6) Uiso 0.20 1 d PD A 2 
H9A H 0.7305 0.7894 -0.5225 0.016 Uiso 0.20 1 calc PR A 2 
C10A C 0.7917(15) 0.8756(12) -0.5029(12) 0.027(8) Uiso 0.20 1 d PD A 2 
H10A H 0.7964 0.9002 -0.5469 0.032 Uiso 0.20 1 calc PR A 2 
C11A C 0.8246(14) 0.9069(12) -0.4549(13) 0.025(10) Uiso 0.20 1 d PD A 2 
C12A C 0.817(2) 0.8702(16) -0.3906(14) 0.050(15) Uiso 0.20 1 d PD A 2 
H12K H 0.8390 0.8901 -0.3567 0.059 Uiso 0.20 1 calc PR A 2 
C13A C 0.777(2) 0.8035(16) -0.3765(13) 0.028(12) Uiso 0.20 1 d PD A 2 
H13A H 0.7725 0.7787 -0.3326 0.034 Uiso 0.20 1 calc PR A 2 
C14A C 0.867(2) 0.9807(14) -0.4752(17) 0.036(10) Uiso 0.20 1 d PD A 2 
H14D H 0.9373 0.9713 -0.4899 0.043 Uiso 0.20 1 calc PR A 2 
H14E H 0.8627 1.0055 -0.4379 0.043 Uiso 0.20 1 calc PR A 2 
H14F H 0.8296 1.0120 -0.5105 0.043 Uiso 0.20 1 calc PR A 2 
O170 O 0.570(3) 0.949(2) -0.618(2) 0.096(13) Uiso 0.20 1 d P C -2 
C170 C 0.539(4) 0.923(3) -0.559(2) 0.056(12) Uiso 0.20 1 d P C -2 
H170 H 0.5158 0.8759 -0.5489 0.067 Uiso 0.20 1 calc PR C -2 
N170 N 0.540(3) 0.9580(18) -0.5161(17) 0.044(9) Uiso 0.20 1 d P C -2 
C171 C 0.573(4) 1.027(3) -0.522(2) 0.059(13) Uiso 0.20 1 d P C -2 
H17A H 0.6407 1.0207 -0.5075 0.070 Uiso 0.20 1 calc PR C -2 
H17B H 0.5288 1.0571 -0.4955 0.070 Uiso 0.20 1 calc PR C -2 
H17C H 0.5716 1.0523 -0.5678 0.070 Uiso 0.20 1 calc PR C -2 
C172 C 0.525(4) 0.920(3) -0.447(2) 0.062(13) Uiso 0.20 1 d P C -2 
H17D H 0.4900 0.8778 -0.4461 0.074 Uiso 0.20 1 calc PR C -2 
H17E H 0.4865 0.9544 -0.4225 0.074 Uiso 0.20 1 calc PR C -2 
H17F H 0.5903 0.9033 -0.4284 0.074 Uiso 0.20 1 calc PR C -2 
C16 C 0.5784(5) 0.3916(4) -0.3653(3) 0.0260(16) Uani 1 1 d . . . 
H16 H 0.5660 0.3616 -0.3947 0.031 Uiso 1 1 calc R . . 
N4 N 0.5721(4) 0.3667(3) -0.3047(3) 0.0240(13) Uani 1 1 d . . . 
C18 C 0.5432(5) 0.2959(4) -0.2806(3) 0.0279(17) Uani 1 1 d . . . 
C19 C 0.4871(6) 0.2627(4) -0.3153(4) 0.044(2) Uani 1 1 d . . . 
H19 H 0.4660 0.2869 -0.3571 0.053 Uiso 1 1 calc R . . 
C20 C 0.4615(7) 0.1931(4) -0.2883(5) 0.049(2) Uani 1 1 d . . . 
H20 H 0.4218 0.1707 -0.3120 0.058 Uiso 1 1 calc R . . 
C21 C 0.4924(6) 0.1559(4) -0.2282(4) 0.044(2) Uani 1 1 d . . . 
C22 C 0.5475(6) 0.1907(4) -0.1935(4) 0.042(2) Uani 1 1 d . . . 
H22 H 0.5687 0.1667 -0.1516 0.050 Uiso 1 1 calc R . . 
C23 C 0.5715(6) 0.2600(4) -0.2192(4) 0.0307(17) Uani 1 1 d . . . 
H23 H 0.6081 0.2836 -0.1945 0.037 Uiso 1 1 calc R . . 
C24 C 0.4669(7) 0.0794(4) -0.2004(5) 0.056(3) Uani 1 1 d . . . 
H24A H 0.3988 0.0762 -0.2105 0.067 Uiso 1 1 calc R . . 
H24B H 0.4725 0.0693 -0.1531 0.067 Uiso 1 1 calc R . . 
H24C H 0.5130 0.0432 -0.2194 0.067 Uiso 1 1 calc R . . 
N31 N 0.8611(4) 0.4267(3) -0.3405(3) 0.0248(13) Uani 1 1 d . . . 
N32 N 0.8353(4) 0.3597(3) -0.3328(3) 0.0227(13) Uani 1 1 d . . . 
C32 C 0.8197(5) 0.3325(4) -0.3851(3) 0.0260(16) Uani 1 1 d . . . 
C33 C 0.8297(6) 0.3725(4) -0.4483(3) 0.0336(18) Uani 1 1 d . . . 
H33 H 0.8169 0.3527 -0.4847 0.040 Uiso 1 1 calc R . . 
C34 C 0.8584(6) 0.4408(4) -0.4562(3) 0.0338(19) Uani 1 1 d . . . 
H34 H 0.8676 0.4696 -0.4983 0.041 Uiso 1 1 calc R . . 
C35 C 0.8739(5) 0.4669(4) -0.4005(3) 0.0263(16) Uani 1 1 d . . . 
C36 C 0.9070(5) 0.5383(4) -0.4056(3) 0.0282(17) Uani 1 1 d . . . 
H36 H 0.9152 0.5678 -0.4474 0.034 Uiso 1 1 calc R . . 
N33 N 0.9252(4) 0.5627(3) -0.3560(3) 0.0242(13) Uani 1 1 d . . . 
C38 C 0.9665(5) 0.6300(4) -0.3631(4) 0.0311(18) Uani 1 1 d . . . 
C39 C 0.9892(6) 0.6745(4) -0.4223(4) 0.0358(19) Uani 1 1 d . . . 
H39 H 0.9722 0.6628 -0.4617 0.043 Uiso 1 1 calc R . . 
C40 C 1.0360(7) 0.7351(4) -0.4240(5) 0.051(2) Uani 1 1 d . . . 
H40 H 1.0512 0.7647 -0.4647 0.061 Uiso 1 1 calc R . . 
C41 C 1.0615(7) 0.7539(4) -0.3676(4) 0.043(2) Uani 1 1 d . . . 
C42 C 1.0363(6) 0.7117(4) -0.3085(4) 0.039(2) Uani 1 1 d . . . 
H42 H 1.0507 0.7254 -0.2694 0.047 Uiso 1 1 calc R . . 
C43 C 0.9905(5) 0.6497(4) -0.3058(4) 0.0311(18) Uani 1 1 d . . . 
H43 H 0.9753 0.6204 -0.2649 0.037 Uiso 1 1 calc R . . 
C44 C 1.1199(8) 0.8188(5) -0.3709(5) 0.069(3) Uani 1 1 d . . . 
H44A H 1.1001 0.8424 -0.3334 0.083 Uiso 1 1 calc R . . 
H44B H 1.1057 0.8544 -0.4111 0.083 Uiso 1 1 calc R . . 
H44C H 1.1912 0.8010 -0.3704 0.083 Uiso 1 1 calc R . . 
C46 C 0.7892(5) 0.2592(4) -0.3743(3) 0.0256(16) Uani 1 1 d . . . 
H46 H 0.7758 0.2399 -0.4109 0.031 Uiso 1 1 calc R . . 
N34 N 0.7798(4) 0.2202(3) -0.3179(3) 0.0254(13) Uani 1 1 d . . . 
C48 C 0.7484(5) 0.1497(4) -0.3103(4) 0.0282(17) Uani 1 1 d . . . 
C49 C 0.7018(6) 0.1259(4) -0.3568(4) 0.041(2) Uani 1 1 d . . . 
H49 H 0.6872 0.1585 -0.3967 0.049 Uiso 1 1 calc R . . 
C50 C 0.6760(6) 0.0553(4) -0.3467(4) 0.044(2) Uani 1 1 d . . . 
H50 H 0.6449 0.0401 -0.3799 0.052 Uiso 1 1 calc R . . 
C51 C 0.6950(6) 0.0067(4) -0.2887(4) 0.042(2) Uani 1 1 d . . . 
C52 C 0.7370(6) 0.0315(4) -0.2414(4) 0.040(2) Uani 1 1 d . . . 
H52 H 0.7475 -0.0002 -0.2005 0.048 Uiso 1 1 calc R . . 
C53 C 0.7651(6) 0.1021(4) -0.2512(4) 0.0344(19) Uani 1 1 d . . . 
H53 H 0.7954 0.1174 -0.2177 0.041 Uiso 1 1 calc R . . 
C54 C 0.6681(8) -0.0695(4) -0.2775(5) 0.061(3) Uani 1 1 d . . . 
H54A H 0.7200 -0.1012 -0.2974 0.074 Uiso 1 1 calc R . . 
H54B H 0.6047 -0.0688 -0.2969 0.074 Uiso 1 1 calc R . . 
H54C H 0.6620 -0.0886 -0.2307 0.074 Uiso 1 1 calc R . . 
N61 N 0.7445(4) 0.6144(3) -0.1997(3) 0.0226(13) Uani 1 1 d . . . 
N62 N 0.8131(4) 0.5564(3) -0.1843(3) 0.0237(13) Uani 1 1 d . A . 
C62 C 0.8469(5) 0.5383(3) -0.1244(3) 0.0192(14) Uani 1 1 d . . . 
C63 C 0.8106(5) 0.5773(3) -0.0759(3) 0.0234(16) Uani 1 1 d . A . 
H63 H 0.8354 0.5634 -0.0335 0.028 Uiso 1 1 calc R . . 
C64 C 0.7380(5) 0.6364(4) -0.0907(3) 0.0254(16) Uani 1 1 d . . . 
H64 H 0.7107 0.6645 -0.0591 0.031 Uiso 1 1 calc R A . 
C65 C 0.7063(5) 0.6532(3) -0.1543(3) 0.0212(15) Uani 1 1 d . A . 
C66 C 0.6273(5) 0.7138(3) -0.1747(3) 0.0222(15) Uani 1 1 d . . . 
H66 H 0.5991 0.7435 -0.1445 0.027 Uiso 1 1 calc R A . 
N63 N 0.5957(4) 0.7275(3) -0.2321(3) 0.0203(12) Uani 1 1 d . A . 
C68 C 0.5185(5) 0.7860(3) -0.2523(3) 0.0233(15) Uani 1 1 d . . . 
C69 C 0.4804(5) 0.8385(4) -0.2149(3) 0.0276(17) Uani 1 1 d . A . 
H69 H 0.5044 0.8361 -0.1731 0.033 Uiso 1 1 calc R . . 
C70 C 0.4080(6) 0.8935(4) -0.2394(4) 0.0335(18) Uani 1 1 d . . . 
H70 H 0.3844 0.9305 -0.2148 0.040 Uiso 1 1 calc R A . 
C71 C 0.3675(6) 0.8971(5) -0.2995(4) 0.046(2) Uani 1 1 d . A . 
C72 C 0.4052(7) 0.8435(5) -0.3356(4) 0.053(3) Uani 1 1 d . . . 
H72 H 0.3789 0.8447 -0.3765 0.063 Uiso 1 1 calc R A . 
C73 C 0.4812(6) 0.7880(4) -0.3125(4) 0.038(2) Uani 1 1 d . A . 
H73 H 0.5070 0.7519 -0.3376 0.046 Uiso 1 1 calc R . . 
C74 C 0.2852(8) 0.9574(6) -0.3250(5) 0.073(3) Uani 1 1 d . . . 
H74A H 0.2218 0.9374 -0.3199 0.087 Uiso 1 1 calc R A . 
H74B H 0.2996 0.9764 -0.3711 0.087 Uiso 1 1 calc R . . 
H74C H 0.2810 0.9974 -0.3006 0.087 Uiso 1 1 calc R . . 
C76 C 0.9230(5) 0.4734(4) -0.1116(3) 0.0218(15) Uani 1 1 d . A . 
H76 H 0.9475 0.4571 -0.0692 0.026 Uiso 1 1 calc R . . 
N64 N 0.9563(4) 0.4391(3) -0.1572(3) 0.0207(12) Uani 1 1 d . . . 
C78 C 1.0275(5) 0.3750(3) -0.1467(3) 0.0194(14) Uani 1 1 d . A . 
C79 C 1.0649(5) 0.3406(4) -0.0859(3) 0.0280(17) Uani 1 1 d . . . 
H79 H 1.0429 0.3602 -0.0481 0.034 Uiso 1 1 calc R A . 
C80 C 1.1339(5) 0.2780(4) -0.0816(4) 0.0305(18) Uani 1 1 d . A . 
H80 H 1.1588 0.2552 -0.0404 0.037 Uiso 1 1 calc R . . 
C81 C 1.1678(5) 0.2478(4) -0.1357(4) 0.0301(17) Uani 1 1 d . . . 
C82 C 1.1299(5) 0.2823(4) -0.1950(4) 0.0293(17) Uani 1 1 d . A . 
H82 H 1.1528 0.2630 -0.2328 0.035 Uiso 1 1 calc R . . 
C83 C 1.0598(5) 0.3439(3) -0.2006(3) 0.0255(16) Uani 1 1 d . . . 
H83 H 1.0333 0.3652 -0.2416 0.031 Uiso 1 1 calc R A . 
C84 C 1.2423(6) 0.1797(4) -0.1298(4) 0.041(2) Uani 1 1 d . A . 
H84A H 1.2105 0.1388 -0.1378 0.049 Uiso 1 1 calc R . . 
H84B H 1.2677 0.1677 -0.0860 0.049 Uiso 1 1 calc R . . 
H84C H 1.2975 0.1883 -0.1618 0.049 Uiso 1 1 calc R . . 
N91 N 0.7124(4) 0.3886(3) -0.1515(3) 0.0215(13) Uani 1 1 d . . . 
N92 N 0.7801(4) 0.3301(3) -0.1493(3) 0.0230(13) Uani 1 1 d . . . 
C92 C 0.8233(5) 0.3002(3) -0.0931(3) 0.0230(15) Uani 1 1 d . . . 
C93 C 0.8013(5) 0.3290(4) -0.0364(3) 0.0253(16) Uani 1 1 d . . . 
H93 H 0.8351 0.3083 0.0023 0.030 Uiso 1 1 calc R . . 
C94 C 0.7285(5) 0.3886(4) -0.0389(3) 0.0236(15) Uani 1 1 d . . . 
H94 H 0.7092 0.4098 -0.0016 0.028 Uiso 1 1 calc R . . 
C95 C 0.6840(5) 0.4170(4) -0.0979(3) 0.0226(15) Uani 1 1 d . . . 
C96 C 0.6060(5) 0.4793(3) -0.1035(3) 0.0225(15) Uani 1 1 d . . . 
H96 H 0.5875 0.5023 -0.0672 0.027 Uiso 1 1 calc R . . 
N93 N 0.5617(4) 0.5037(3) -0.1571(3) 0.0213(13) Uani 1 1 d . . . 
C98 C 0.4861(5) 0.5657(3) -0.1639(3) 0.0237(16) Uani 1 1 d . . . 
C99 C 0.4611(5) 0.6085(4) -0.1165(3) 0.0250(16) Uani 1 1 d . . . 
H99 H 0.4962 0.5978 -0.0776 0.030 Uiso 1 1 calc R . . 
C100 C 0.3850(5) 0.6667(4) -0.1258(4) 0.0297(17) Uani 1 1 d . . . 
H100 H 0.3678 0.6949 -0.0927 0.036 Uiso 1 1 calc R . . 
C101 C 0.3337(6) 0.6846(4) -0.1824(4) 0.0323(18) Uani 1 1 d . . . 
C102 C 0.3615(6) 0.6421(4) -0.2302(4) 0.042(2) Uani 1 1 d . . . 
H102 H 0.3282 0.6539 -0.2698 0.050 Uiso 1 1 calc R . . 
C103 C 0.4361(6) 0.5839(4) -0.2210(4) 0.0335(18) Uani 1 1 d . . . 
H103 H 0.4536 0.5559 -0.2543 0.040 Uiso 1 1 calc R . . 
C104 C 0.2489(6) 0.7465(4) -0.1916(4) 0.048(2) Uani 1 1 d . . . 
H10B H 0.1856 0.7262 -0.1844 0.058 Uiso 1 1 calc R . . 
H10C H 0.2535 0.7750 -0.2359 0.058 Uiso 1 1 calc R . . 
H10D H 0.2524 0.7785 -0.1603 0.058 Uiso 1 1 calc R . . 
C106 C 0.8957(5) 0.2337(4) -0.0931(3) 0.0268(16) Uani 1 1 d . . . 
H106 H 0.9285 0.2114 -0.0543 0.032 Uiso 1 1 calc R . . 
N94 N 0.9157(4) 0.2052(3) -0.1438(3) 0.0283(14) Uani 1 1 d . . . 
C108 C 0.9812(6) 0.1383(4) -0.1406(4) 0.0337(18) Uani 1 1 d . . . 
C109 C 1.0069(7) 0.0913(4) -0.0823(4) 0.049(2) Uani 1 1 d . . . 
H109 H 0.9824 0.1041 -0.0420 0.059 Uiso 1 1 calc R . . 
C110 C 1.0684(7) 0.0256(4) -0.0837(5) 0.057(3) Uani 1 1 d . . . 
H110 H 1.0863 -0.0059 -0.0438 0.069 Uiso 1 1 calc R . . 
C111 C 1.1042(6) 0.0048(4) -0.1412(4) 0.042(2) Uani 1 1 d . . . 
C112 C 1.0810(6) 0.0529(5) -0.1988(4) 0.047(2) Uani 1 1 d . . . 
H112 H 1.1080 0.0408 -0.2389 0.056 Uiso 1 1 calc R . . 
C113 C 1.0188(6) 0.1185(4) -0.1986(4) 0.0369(19) Uani 1 1 d . . . 
H113 H 1.0019 0.1501 -0.2386 0.044 Uiso 1 1 calc R . . 
C114 C 1.1680(7) -0.0683(4) -0.1410(5) 0.059(3) Uani 1 1 d . . . 
H11A H 1.1464 -0.1047 -0.1044 0.071 Uiso 1 1 calc R . . 
H11B H 1.2376 -0.0629 -0.1367 0.071 Uiso 1 1 calc R . . 
H11C H 1.1614 -0.0847 -0.1818 0.071 Uiso 1 1 calc R . . 
O130 O 0.3993(4) 0.4489(3) -0.0175(3) 0.0441(14) Uani 1 1 d . . . 
C130 C 0.3649(6) 0.4439(4) -0.0687(4) 0.0325(18) Uani 1 1 d . . . 
H130 H 0.3196 0.4839 -0.0889 0.039 Uiso 1 1 calc R . . 
N130 N 0.3871(5) 0.3860(3) -0.0975(3) 0.0334(15) Uani 1 1 d . . . 
C131 C 0.4518(7) 0.3214(4) -0.0692(4) 0.048(2) Uani 1 1 d . . . 
H13B H 0.4647 0.3245 -0.0246 0.057 Uiso 1 1 calc R . . 
H13C H 0.5147 0.3183 -0.0950 0.057 Uiso 1 1 calc R . . 
H13D H 0.4199 0.2776 -0.0687 0.057 Uiso 1 1 calc R . . 
C132 C 0.3474(7) 0.3883(5) -0.1609(4) 0.054(3) Uani 1 1 d . . . 
H13E H 0.3010 0.4335 -0.1724 0.065 Uiso 1 1 calc R . . 
H13F H 0.3125 0.3455 -0.1588 0.065 Uiso 1 1 calc R . . 
H13G H 0.4021 0.3875 -0.1939 0.065 Uiso 1 1 calc R . . 
O140 O 1.0457(5) 0.7947(3) -0.0525(3) 0.0565(17) Uani 1 1 d . . . 
C140 C 0.9993(6) 0.7747(4) -0.0926(4) 0.041(2) Uani 1 1 d . . . 
H140 H 1.0143 0.7249 -0.0978 0.050 Uiso 1 1 calc R . . 
N140 N 0.9303(5) 0.8172(4) -0.1290(4) 0.0463(18) Uani 1 1 d . . . 
C141 C 0.8998(7) 0.8927(5) -0.1200(6) 0.080(4) Uani 1 1 d . . . 
H14G H 0.9467 0.9062 -0.0925 0.097 Uiso 1 1 calc R . . 
H14H H 0.8331 0.8967 -0.0990 0.097 Uiso 1 1 calc R . . 
H14I H 0.8993 0.9259 -0.1623 0.097 Uiso 1 1 calc R . . 
C142 C 0.8787(8) 0.7895(6) -0.1739(5) 0.072(3) Uani 1 1 d . . . 
H14J H 0.9062 0.7383 -0.1744 0.087 Uiso 1 1 calc R . . 
H14K H 0.8866 0.8191 -0.2175 0.087 Uiso 1 1 calc R . . 
H14L H 0.8080 0.7921 -0.1605 0.087 Uiso 1 1 calc R . . 
O150 O 0.3135(5) 0.8053(4) 0.0651(4) 0.072(2) Uani 1 1 d . . . 
C150 C 0.3458(7) 0.8475(5) 0.0194(5) 0.050(2) Uani 1 1 d . . . 
H150 H 0.3855 0.8262 -0.0130 0.060 Uiso 1 1 calc R . . 
N150 N 0.3311(5) 0.9197(4) 0.0104(3) 0.0458(18) Uani 1 1 d . . . 
C151 C 0.3780(7) 0.9663(4) -0.0438(4) 0.051(2) Uani 1 1 d . . . 
H15A H 0.4212 0.9953 -0.0271 0.061 Uiso 1 1 calc R . . 
H15B H 0.3267 0.9994 -0.0693 0.061 Uiso 1 1 calc R . . 
H15C H 0.4178 0.9354 -0.0715 0.061 Uiso 1 1 calc R . . 
C152 C 0.2771(9) 0.9568(6) 0.0595(5) 0.084(4) Uani 1 1 d . . . 
H15D H 0.2453 0.9210 0.0920 0.100 Uiso 1 1 calc R . . 
H15E H 0.2261 0.9951 0.0389 0.100 Uiso 1 1 calc R . . 
H15F H 0.3233 0.9792 0.0806 0.100 Uiso 1 1 calc R . . 
O160 O 0.3934(4) 0.4712(3) -0.3887(3) 0.0433(14) Uani 1 1 d . . . 
C160 C 0.3332(6) 0.4616(5) -0.3437(4) 0.037(2) Uani 1 1 d . . . 
H160 H 0.3389 0.4144 -0.3164 0.045 Uiso 1 1 calc R . . 
N160 N 0.2587(5) 0.5121(3) -0.3290(3) 0.0287(14) Uani 1 1 d . . . 
C161 C 0.2437(6) 0.5828(4) -0.3717(4) 0.039(2) Uani 1 1 d . . . 
H16A H 0.1990 0.5808 -0.4056 0.047 Uiso 1 1 calc R . . 
H16B H 0.3077 0.5956 -0.3918 0.047 Uiso 1 1 calc R . . 
H16C H 0.2142 0.6202 -0.3467 0.047 Uiso 1 1 calc R . . 
C162 C 0.1809(6) 0.4935(4) -0.2806(4) 0.041(2) Uani 1 1 d . . . 
H16D H 0.1972 0.4426 -0.2578 0.049 Uiso 1 1 calc R . . 
H16E H 0.1178 0.4986 -0.3018 0.049 Uiso 1 1 calc R . . 
H16F H 0.1748 0.5266 -0.2493 0.049 Uiso 1 1 calc R . . 
B1 B 0.9016(6) 0.4257(4) 0.0957(4) 0.0267(19) Uani 1 1 d D . . 
F11 F 0.9728(3) 0.4183(2) 0.0451(2) 0.0402(11) Uani 1 1 d D . . 
F12 F 0.8243(3) 0.3884(2) 0.0884(2) 0.0402(11) Uani 1 1 d D . . 
F13 F 0.9460(3) 0.3960(2) 0.1541(2) 0.0445(12) Uani 1 1 d D . . 
F14 F 0.8682(3) 0.4996(2) 0.0924(3) 0.0507(13) Uani 1 1 d D . . 
B2 B 0.6251(8) 0.8429(5) -0.0517(5) 0.041(2) Uani 1 1 d . . . 
F21 F 0.6000(4) 0.8714(3) 0.0035(2) 0.0620(15) Uani 1 1 d . . . 
F22 F 0.5497(4) 0.8044(3) -0.0622(2) 0.0533(13) Uani 1 1 d . . . 
F23 F 0.7127(4) 0.7942(3) -0.0442(2) 0.0552(14) Uani 1 1 d . . . 
F24 F 0.6340(4) 0.8968(3) -0.1066(3) 0.0687(16) Uani 1 1 d . . . 
B3 B 0.4013(7) 0.7260(4) -0.4820(4) 0.041(2) Uani 1 1 d D . . 
F31 F 0.4312(4) 0.6987(3) -0.4197(2) 0.0570(14) Uani 1 1 d D D . 
F32 F 0.3561(7) 0.6773(5) -0.5059(3) 0.074(2) Uani 0.75 1 d PD D 1 
F33 F 0.4844(7) 0.7377(7) -0.5247(4) 0.100(3) Uani 0.75 1 d PD D 1 
F34 F 0.3439(13) 0.7891(7) -0.4835(5) 0.170(7) Uani 0.75 1 d PD D 1 
F35 F 0.3010(12) 0.726(2) -0.4819(12) 0.100(3) Uani 0.25 1 d PD D 2 
F36 F 0.415(2) 0.7985(9) -0.5002(11) 0.074(2) Uani 0.25 1 d PD D 2 
F37 F 0.455(3) 0.6864(17) -0.5211(11) 0.170(7) Uani 0.25 1 d PD D 2 
B4 B 1.1296(6) 0.3755(4) -0.4041(3) 0.0274(19) Uani 1 1 d D . . 
F41 F 1.1036(4) 0.4511(2) -0.4129(2) 0.0471(12) Uani 1 1 d D E . 
F42 F 1.0681(7) 0.3427(4) -0.3601(5) 0.082(3) Uani 0.75 1 d PD E 1 
F43 F 1.1377(9) 0.3509(4) -0.4599(3) 0.091(3) Uani 0.75 1 d PD E 1 
F44 F 1.2234(7) 0.3548(4) -0.3787(6) 0.101(3) Uani 0.75 1 d PD E 1 
F45 F 1.153(3) 0.3451(13) -0.3440(7) 0.091(3) Uani 0.25 1 d PD E 2 
F46 F 1.0474(16) 0.3470(11) -0.4201(17) 0.101(3) Uani 0.25 1 d PD E 2 
F47 F 1.2029(18) 0.3667(12) -0.4507(12) 0.082(3) Uani 0.25 1 d PD E 2 
 
loop_ 
 _atom_site_aniso_label 
 _atom_site_aniso_U_11 
 _atom_site_aniso_U_22 
 _atom_site_aniso_U_33 
 _atom_site_aniso_U_23 
 _atom_site_aniso_U_13 
 _atom_site_aniso_U_12 
Ag1 0.0326(4) 0.0258(3) 0.0223(3) -0.0076(2) -0.0075(2) 0.0029(2) 
Ag2 0.0347(4) 0.0288(3) 0.0223(3) -0.0059(2) -0.0071(2) 0.0013(2) 
Ag3 0.0332(4) 0.0231(3) 0.0235(3) -0.0065(2) -0.0077(2) 0.0045(2) 
Ag4 0.0337(4) 0.0328(3) 0.0292(3) -0.0101(2) -0.0043(3) 0.0043(3) 
N1 0.024(4) 0.022(3) 0.028(3) -0.004(2) -0.006(3) -0.007(3) 
N2 0.022(3) 0.024(3) 0.024(3) -0.007(2) -0.004(3) -0.001(3) 
C2 0.011(4) 0.031(4) 0.025(4) -0.007(3) 0.000(3) 0.002(3) 
C3 0.034(5) 0.035(4) 0.028(4) -0.008(3) -0.009(3) -0.007(4) 
C4 0.039(5) 0.036(4) 0.025(4) -0.004(3) -0.003(3) -0.009(4) 
C5 0.026(4) 0.044(4) 0.017(4) -0.007(3) -0.005(3) 0.000(3) 
C6 0.048(6) 0.042(5) 0.022(4) -0.003(3) -0.004(4) -0.020(4) 
N3 0.030(4) 0.028(3) 0.030(3) -0.005(3) -0.001(3) -0.006(3) 
C8 0.050(8) 0.020(5) 0.033(6) -0.004(4) -0.006(5) -0.013(6) 
C9 0.085(10) 0.041(6) 0.039(6) 0.006(5) -0.018(6) -0.021(6) 
C10 0.150(15) 0.037(7) 0.041(7) 0.016(5) -0.031(8) -0.045(8) 
C11 0.088(10) 0.036(6) 0.038(6) -0.009(5) 0.002(6) -0.032(7) 
C12 0.062(9) 0.033(6) 0.045(9) -0.007(6) -0.005(6) -0.016(6) 
C13 0.036(7) 0.027(6) 0.054(8) -0.004(5) -0.004(6) -0.001(5) 
C14 0.154(17) 0.055(8) 0.057(9) -0.010(7) -0.004(9) -0.056(10) 
O120 0.031(4) 0.022(3) 0.068(5) -0.001(3) -0.005(4) -0.002(3) 
C121 0.040(7) 0.036(6) 0.077(8) -0.014(6) -0.001(6) -0.007(5) 
C122 0.030(6) 0.049(7) 0.062(7) -0.019(6) -0.006(5) 0.005(5) 
C123 0.045(8) 0.020(6) 0.127(12) -0.001(6) 0.005(8) 0.008(5) 
C124 0.063(10) 0.022(6) 0.137(13) -0.017(7) -0.007(9) -0.003(6) 
C16 0.021(4) 0.031(4) 0.029(4) -0.011(3) -0.007(3) -0.001(3) 
N4 0.022(3) 0.023(3) 0.027(3) -0.006(2) -0.001(3) 0.000(3) 
C18 0.024(4) 0.031(4) 0.031(4) -0.013(3) 0.001(3) 0.001(3) 
C19 0.049(6) 0.033(5) 0.051(5) -0.005(4) 0.000(4) -0.013(4) 
C20 0.048(6) 0.038(5) 0.066(6) -0.014(4) -0.007(5) -0.014(4) 
C21 0.036(5) 0.028(4) 0.064(6) -0.006(4) 0.014(4) -0.001(4) 
C22 0.034(5) 0.029(4) 0.053(5) 0.002(4) 0.001(4) 0.011(4) 
C23 0.030(5) 0.025(4) 0.033(4) -0.004(3) 0.005(3) 0.005(3) 
C24 0.052(6) 0.028(5) 0.083(7) -0.005(4) 0.022(5) -0.013(4) 
N31 0.024(4) 0.021(3) 0.030(3) -0.009(2) -0.001(3) 0.003(3) 
N32 0.020(3) 0.022(3) 0.027(3) -0.007(2) 0.000(3) -0.003(2) 
C32 0.018(4) 0.027(4) 0.033(4) -0.008(3) 0.002(3) -0.005(3) 
C33 0.044(5) 0.041(5) 0.018(4) -0.008(3) -0.003(3) -0.011(4) 
C34 0.049(5) 0.035(4) 0.021(4) -0.007(3) 0.003(4) -0.018(4) 
C35 0.024(4) 0.029(4) 0.024(4) -0.002(3) 0.000(3) -0.006(3) 
C36 0.028(4) 0.030(4) 0.026(4) -0.001(3) 0.000(3) -0.008(3) 
N33 0.021(3) 0.024(3) 0.029(3) -0.011(3) -0.003(3) 0.002(3) 
C38 0.024(4) 0.026(4) 0.046(5) -0.014(3) -0.008(4) 0.002(3) 
C39 0.049(6) 0.020(4) 0.039(5) -0.003(3) -0.009(4) -0.009(4) 
C40 0.067(7) 0.024(4) 0.060(6) 0.004(4) -0.016(5) -0.009(4) 
C41 0.049(6) 0.021(4) 0.060(6) -0.004(4) -0.018(5) -0.005(4) 
C42 0.038(5) 0.031(4) 0.054(5) -0.020(4) -0.015(4) 0.000(4) 
C43 0.021(4) 0.029(4) 0.043(5) -0.010(3) -0.008(3) 0.004(3) 
C44 0.083(8) 0.034(5) 0.098(8) -0.018(5) -0.024(7) -0.016(5) 
C46 0.027(4) 0.025(4) 0.026(4) -0.009(3) -0.002(3) -0.002(3) 
N34 0.018(3) 0.024(3) 0.034(4) -0.009(3) 0.000(3) 0.001(3) 
C48 0.023(4) 0.022(4) 0.037(4) -0.007(3) 0.005(3) 0.004(3) 
C49 0.048(6) 0.030(4) 0.044(5) -0.003(4) -0.006(4) -0.009(4) 
C50 0.048(6) 0.036(5) 0.052(5) -0.013(4) 0.001(4) -0.018(4) 
C51 0.038(5) 0.024(4) 0.066(6) -0.014(4) 0.004(4) -0.007(4) 
C52 0.031(5) 0.029(4) 0.052(5) 0.006(4) -0.001(4) 0.001(4) 
C53 0.030(5) 0.028(4) 0.044(5) -0.005(3) -0.010(4) 0.005(3) 
C54 0.066(7) 0.030(5) 0.084(8) -0.001(5) 0.004(6) -0.010(5) 
N61 0.020(3) 0.016(3) 0.031(3) -0.006(2) -0.008(3) 0.006(2) 
N62 0.026(4) 0.021(3) 0.024(3) -0.007(2) -0.002(3) 0.003(3) 
C62 0.015(4) 0.020(3) 0.021(4) -0.002(3) -0.005(3) 0.003(3) 
C63 0.030(4) 0.022(4) 0.018(4) -0.004(3) -0.009(3) 0.002(3) 
C64 0.022(4) 0.028(4) 0.026(4) -0.007(3) -0.007(3) 0.003(3) 
C65 0.019(4) 0.016(3) 0.027(4) -0.002(3) -0.002(3) 0.001(3) 
C66 0.019(4) 0.022(4) 0.026(4) -0.008(3) -0.001(3) 0.000(3) 
N63 0.015(3) 0.015(3) 0.030(3) -0.004(2) -0.007(2) 0.002(2) 
C68 0.019(4) 0.020(4) 0.030(4) -0.001(3) -0.006(3) -0.001(3) 
C69 0.029(4) 0.026(4) 0.028(4) -0.010(3) -0.007(3) 0.002(3) 
C70 0.029(5) 0.027(4) 0.042(5) -0.010(3) -0.006(4) 0.013(3) 
C71 0.041(6) 0.045(5) 0.043(5) -0.003(4) -0.011(4) 0.022(4) 
C72 0.047(6) 0.069(6) 0.037(5) -0.019(4) -0.023(4) 0.031(5) 
C73 0.036(5) 0.043(5) 0.035(4) -0.017(4) -0.009(4) 0.017(4) 
C74 0.069(8) 0.078(7) 0.062(7) -0.024(5) -0.030(6) 0.051(6) 
C76 0.016(4) 0.027(4) 0.022(4) -0.002(3) -0.003(3) -0.003(3) 
N64 0.022(3) 0.014(3) 0.023(3) 0.001(2) -0.005(2) 0.003(2) 
C78 0.016(4) 0.015(3) 0.027(4) -0.003(3) -0.003(3) -0.004(3) 
C79 0.033(5) 0.021(4) 0.028(4) -0.004(3) -0.006(3) 0.004(3) 
C80 0.027(4) 0.028(4) 0.034(4) -0.004(3) -0.013(3) 0.008(3) 
C81 0.023(4) 0.025(4) 0.042(5) -0.006(3) -0.005(3) 0.000(3) 
C82 0.022(4) 0.024(4) 0.041(4) -0.010(3) -0.002(3) 0.006(3) 
C83 0.028(4) 0.021(4) 0.027(4) 0.000(3) -0.008(3) -0.003(3) 
C84 0.041(5) 0.029(4) 0.051(5) -0.011(4) -0.008(4) 0.013(4) 
N91 0.018(3) 0.015(3) 0.029(3) -0.002(2) -0.008(2) 0.005(2) 
N92 0.021(3) 0.024(3) 0.024(3) -0.006(2) -0.007(3) 0.002(3) 
C92 0.021(4) 0.020(3) 0.028(4) -0.004(3) -0.001(3) -0.003(3) 
C93 0.028(4) 0.023(4) 0.022(4) 0.001(3) -0.005(3) 0.003(3) 
C94 0.026(4) 0.023(4) 0.020(4) -0.003(3) 0.002(3) -0.001(3) 
C95 0.022(4) 0.022(4) 0.026(4) -0.006(3) -0.004(3) -0.002(3) 
C96 0.020(4) 0.019(3) 0.026(4) -0.003(3) 0.002(3) 0.001(3) 
N93 0.020(3) 0.018(3) 0.024(3) -0.003(2) -0.001(2) 0.000(2) 
C98 0.019(4) 0.016(3) 0.034(4) -0.001(3) -0.002(3) 0.001(3) 
C99 0.027(4) 0.023(4) 0.023(4) -0.003(3) -0.003(3) 0.001(3) 
C100 0.029(5) 0.025(4) 0.033(4) -0.006(3) 0.005(3) 0.001(3) 
C101 0.024(4) 0.023(4) 0.046(5) -0.006(3) -0.001(4) 0.007(3) 
C102 0.044(5) 0.029(4) 0.050(5) 0.002(4) -0.027(4) 0.002(4) 
C103 0.034(5) 0.030(4) 0.037(4) -0.008(3) -0.010(4) 0.001(4) 
C104 0.038(5) 0.041(5) 0.057(6) 0.000(4) -0.008(4) 0.012(4) 
C106 0.027(4) 0.020(4) 0.030(4) 0.000(3) -0.002(3) 0.001(3) 
N94 0.027(4) 0.020(3) 0.037(4) -0.007(3) 0.001(3) 0.000(3) 
C108 0.026(5) 0.026(4) 0.049(5) -0.009(3) -0.004(4) 0.002(3) 
C109 0.075(7) 0.016(4) 0.046(5) -0.002(3) 0.016(5) 0.016(4) 
C110 0.067(7) 0.027(5) 0.062(6) 0.011(4) 0.012(5) 0.015(4) 
C111 0.037(5) 0.019(4) 0.071(6) -0.018(4) 0.010(4) 0.000(4) 
C112 0.038(5) 0.045(5) 0.059(6) -0.024(4) -0.008(4) 0.011(4) 
C113 0.030(5) 0.041(5) 0.042(5) -0.018(4) -0.008(4) 0.004(4) 
C114 0.053(7) 0.033(5) 0.091(8) -0.022(5) 0.002(6) 0.008(4) 
O130 0.058(4) 0.044(3) 0.032(3) -0.016(3) -0.003(3) -0.001(3) 
C130 0.030(5) 0.031(4) 0.034(5) -0.005(3) 0.005(4) -0.003(3) 
N130 0.031(4) 0.039(4) 0.033(4) -0.011(3) -0.002(3) -0.006(3) 
C131 0.061(6) 0.027(4) 0.047(5) -0.003(4) -0.005(4) 0.012(4) 
C132 0.060(7) 0.064(6) 0.048(6) -0.021(5) -0.024(5) -0.013(5) 
O140 0.067(5) 0.058(4) 0.035(3) 0.001(3) -0.014(3) 0.015(3) 
C140 0.043(6) 0.032(4) 0.039(5) 0.005(4) 0.006(4) 0.012(4) 
N140 0.037(4) 0.039(4) 0.060(5) 0.001(3) -0.006(4) -0.004(3) 
C141 0.041(6) 0.028(5) 0.164(12) 0.002(6) -0.029(7) 0.008(4) 
C142 0.045(7) 0.110(9) 0.065(7) -0.025(6) -0.006(5) -0.007(6) 
O150 0.064(5) 0.055(4) 0.092(6) 0.013(4) -0.001(4) -0.026(4) 
C150 0.039(6) 0.039(5) 0.071(7) -0.007(5) 0.004(5) -0.013(4) 
N150 0.038(5) 0.046(4) 0.052(5) -0.010(4) 0.002(4) -0.001(3) 
C151 0.054(6) 0.033(5) 0.062(6) -0.002(4) -0.003(5) -0.001(4) 
C152 0.090(9) 0.085(8) 0.068(8) -0.022(6) 0.016(7) 0.017(7) 
O160 0.022(3) 0.079(4) 0.028(3) -0.015(3) -0.002(2) 0.008(3) 
C160 0.033(5) 0.049(5) 0.031(5) -0.011(4) -0.017(4) 0.006(4) 
N160 0.031(4) 0.031(3) 0.022(3) -0.002(3) -0.002(3) 0.000(3) 
C161 0.049(6) 0.030(4) 0.037(5) -0.004(3) -0.002(4) -0.006(4) 
C162 0.033(5) 0.048(5) 0.035(5) 0.004(4) -0.004(4) 0.001(4) 
B1 0.024(5) 0.027(4) 0.030(5) -0.007(3) -0.013(4) 0.001(4) 
F11 0.035(3) 0.052(3) 0.033(2) -0.009(2) 0.004(2) -0.006(2) 
F12 0.036(3) 0.044(3) 0.045(3) -0.011(2) -0.008(2) -0.013(2) 
F13 0.049(3) 0.054(3) 0.031(2) -0.004(2) -0.017(2) -0.009(2) 
F14 0.037(3) 0.032(3) 0.086(4) -0.019(2) -0.018(3) 0.008(2) 
B2 0.047(7) 0.033(5) 0.040(6) -0.004(4) -0.007(5) -0.001(5) 
F21 0.086(4) 0.048(3) 0.055(3) -0.028(2) -0.027(3) 0.018(3) 
F22 0.054(3) 0.063(3) 0.049(3) -0.028(3) -0.006(2) -0.002(3) 
F23 0.048(3) 0.045(3) 0.070(3) -0.014(2) -0.015(3) 0.015(2) 
F24 0.066(4) 0.055(3) 0.073(4) 0.016(3) -0.012(3) -0.003(3) 
B3 0.046(7) 0.038(5) 0.043(6) -0.012(4) -0.004(5) -0.007(5) 
F31 0.069(4) 0.061(3) 0.046(3) -0.012(2) -0.019(3) -0.014(3) 
F32 0.097(6) 0.097(6) 0.047(4) -0.030(4) 0.004(4) -0.056(5) 
F33 0.090(7) 0.160(10) 0.057(5) -0.009(6) 0.007(5) -0.063(7) 
F34 0.281(18) 0.125(9) 0.058(6) -0.020(6) -0.012(8) 0.136(11) 
F35 0.090(7) 0.160(10) 0.057(5) -0.009(6) 0.007(5) -0.063(7) 
F36 0.097(6) 0.097(6) 0.047(4) -0.030(4) 0.004(4) -0.056(5) 
F37 0.281(18) 0.125(9) 0.058(6) -0.020(6) -0.012(8) 0.136(11) 
B4 0.023(5) 0.031(5) 0.028(5) -0.006(4) -0.002(4) -0.004(4) 
F41 0.060(3) 0.026(2) 0.051(3) 0.003(2) -0.009(2) -0.002(2) 
F42 0.072(6) 0.043(4) 0.108(7) 0.010(4) 0.040(5) 0.015(4) 
F43 0.159(9) 0.070(5) 0.023(4) -0.009(3) 0.005(5) 0.052(6) 
F44 0.099(7) 0.040(4) 0.172(10) -0.016(5) -0.100(7) 0.005(4) 
F45 0.159(9) 0.070(5) 0.023(4) -0.009(3) 0.005(5) 0.052(6) 
F46 0.099(7) 0.040(4) 0.172(10) -0.016(5) -0.100(7) 0.005(4) 
F47 0.072(6) 0.043(4) 0.108(7) 0.010(4) 0.040(5) 0.015(4) 
 
_geom_special_details 
; 
 All esds (except the esd in the dihedral angle between two l.s. planes) 
 are estimated using the full covariance matrix.  The cell esds are taken 
 into account individually in the estimation of esds in distances, angles 
 and torsion angles; correlations between esds in cell parameters are only 
 used when they are defined by crystal symmetry.  An approximate (isotropic) 
 treatment of cell esds is used for estimating esds involving l.s. planes. 
; 
 
loop_ 
 _geom_bond_atom_site_label_1 
 _geom_bond_atom_site_label_2 
 _geom_bond_distance 
 _geom_bond_site_symmetry_2 
 _geom_bond_publ_flag 
Ag1 N61 2.292(5) . y 
Ag1 N1 2.316(5) . y 
Ag1 N3 2.342(6) . y 
Ag1 N63 2.347(5) . y 
Ag2 N93 2.293(5) . y 
Ag2 N4 2.313(5) . y 
Ag2 N2 2.333(5) . y 
Ag2 N91 2.339(5) . y 
Ag3 N64 2.288(5) . y 
Ag3 N31 2.297(5) . y 
Ag3 N62 2.362(5) . y 
Ag3 N33 2.367(6) . y 
Ag4 N34 2.288(6) . y 
Ag4 N94 2.313(6) . y 
Ag4 N92 2.346(5) . y 
Ag4 N32 2.444(5) . y 
N1 C5 1.324(8) . ? 
N1 N2 1.331(7) . ? 
N2 C2 1.342(8) . ? 
C2 C3 1.387(9) . ? 
C2 C16 1.482(9) . ? 
C3 C4 1.374(10) . ? 
C3 H3 0.9500 . ? 
C4 C5 1.383(10) . ? 
C4 H4 0.9500 . ? 
C5 C6 1.476(10) . ? 
C6 N3 1.271(9) . ? 
C6 H6 0.9500 . ? 
N3 C8A 1.33(3) . ? 
N3 C8 1.460(10) . ? 
C8 C9 1.385(11) . ? 
C8 C13 1.390(10) . ? 
C9 C10 1.393(11) . ? 
C9 H9 0.9500 . ? 
C10 C11 1.387(12) . ? 
C10 H10 0.9500 . ? 
C11 C12 1.389(12) . ? 
C11 C14 1.533(14) . ? 
C12 C13 1.396(11) . ? 
C12 H12 0.9500 . ? 
C13 H13 0.9500 . ? 
C14 H14A 0.9800 . ? 
C14 H14B 0.9800 . ? 
C14 H14C 0.9800 . ? 
O120 C121 1.341(12) . ? 
O120 C123 1.399(12) . ? 
C121 C122 1.456(14) . ? 
C121 H12A 0.9900 . ? 
C121 H12B 0.9900 . ? 
C122 H12C 0.9800 . ? 
C122 H12D 0.9800 . ? 
C122 H12E 0.9800 . ? 
C123 C124 1.472(17) . ? 
C123 H12F 0.9900 . ? 
C123 H12G 0.9900 . ? 
C124 H12H 0.9800 . ? 
C124 H12I 0.9800 . ? 
C124 H12J 0.9800 . ? 
C8A C9A 1.384(15) . ? 
C8A C13A 1.396(15) . ? 
C9A C10A 1.392(15) . ? 
C9A H9A 0.9500 . ? 
C10A C11A 1.392(15) . ? 
C10A H10A 0.9500 . ? 
C11A C12A 1.393(15) . ? 
C11A C14A 1.55(2) . ? 
C12A C13A 1.400(15) . ? 
C12A H12K 0.9500 . ? 
C13A H13A 0.9500 . ? 
C14A H14D 0.9800 . ? 
C14A H14E 0.9800 . ? 
C14A H14F 0.9800 . ? 
O170 C170 1.30(6) . ? 
C170 N170 1.22(5) . ? 
C170 H170 0.9500 . ? 
N170 C171 1.41(5) . ? 
N170 C172 1.49(6) . ? 
C171 H17A 0.9800 . ? 
C171 H17B 0.9800 . ? 
C171 H17C 0.9800 . ? 
C172 H17D 0.9800 . ? 
C172 H17E 0.9800 . ? 
C172 H17F 0.9800 . ? 
C16 N4 1.268(8) . ? 
C16 H16 0.9500 . ? 
N4 C18 1.422(9) . ? 
C18 C19 1.379(11) . ? 
C18 C23 1.386(10) . ? 
C19 C20 1.396(11) . ? 
C19 H19 0.9500 . ? 
C20 C21 1.380(12) . ? 
C20 H20 0.9500 . ? 
C21 C22 1.389(12) . ? 
C21 C24 1.515(11) . ? 
C22 C23 1.379(10) . ? 
C22 H22 0.9500 . ? 
C23 H23 0.9500 . ? 
C24 H24A 0.9800 . ? 
C24 H24B 0.9800 . ? 
C24 H24C 0.9800 . ? 
N31 N32 1.328(7) . ? 
N31 C35 1.348(9) . ? 
N32 C32 1.341(8) . ? 
C32 C33 1.397(10) . ? 
C32 C46 1.459(9) . ? 
C33 C34 1.366(10) . ? 
C33 H33 0.9500 . ? 
C34 C35 1.395(9) . ? 
C34 H34 0.9500 . ? 
C35 C36 1.452(9) . ? 
C36 N33 1.272(8) . ? 
C36 H36 0.9500 . ? 
N33 C38 1.427(9) . ? 
C38 C39 1.396(10) . ? 
C38 C43 1.401(10) . ? 
C39 C40 1.371(10) . ? 
C39 H39 0.9500 . ? 
C40 C41 1.382(12) . ? 
C40 H40 0.9500 . ? 
C41 C42 1.382(11) . ? 
C41 C44 1.530(11) . ? 
C42 C43 1.384(10) . ? 
C42 H42 0.9500 . ? 
C43 H43 0.9500 . ? 
C44 H44A 0.9800 . ? 
C44 H44B 0.9800 . ? 
C44 H44C 0.9800 . ? 
C46 N34 1.271(9) . ? 
C46 H46 0.9500 . ? 
N34 C48 1.420(9) . ? 
C48 C49 1.380(10) . ? 
C48 C53 1.391(10) . ? 
C49 C50 1.388(10) . ? 
C49 H49 0.9500 . ? 
C50 C51 1.386(12) . ? 
C50 H50 0.9500 . ? 
C51 C52 1.368(11) . ? 
C51 C54 1.493(11) . ? 
C52 C53 1.401(10) . ? 
C52 H52 0.9500 . ? 
C53 H53 0.9500 . ? 
C54 H54A 0.9800 . ? 
C54 H54B 0.9800 . ? 
C54 H54C 0.9800 . ? 
N61 N62 1.330(7) . ? 
N61 C65 1.343(8) . ? 
N62 C62 1.336(8) . ? 
C62 C63 1.389(9) . ? 
C62 C76 1.474(9) . ? 
C63 C64 1.376(9) . ? 
C63 H63 0.9500 . ? 
C64 C65 1.397(9) . ? 
C64 H64 0.9500 . ? 
C65 C66 1.466(9) . ? 
C66 N63 1.277(8) . ? 
C66 H66 0.9500 . ? 
N63 C68 1.427(8) . ? 
C68 C73 1.389(10) . ? 
C68 C69 1.397(9) . ? 
C69 C70 1.368(9) . ? 
C69 H69 0.9500 . ? 
C70 C71 1.399(11) . ? 
C70 H70 0.9500 . ? 
C71 C72 1.394(11) . ? 
C71 C74 1.518(11) . ? 
C72 C73 1.398(10) . ? 
C72 H72 0.9500 . ? 
C73 H73 0.9500 . ? 
C74 H74A 0.9800 . ? 
C74 H74B 0.9800 . ? 
C74 H74C 0.9800 . ? 
C76 N64 1.278(8) . ? 
C76 H76 0.9500 . ? 
N64 C78 1.423(8) . ? 
C78 C83 1.387(9) . ? 
C78 C79 1.408(9) . ? 
C79 C80 1.384(9) . ? 
C79 H79 0.9500 . ? 
C80 C81 1.388(10) . ? 
C80 H80 0.9500 . ? 
C81 C82 1.384(10) . ? 
C81 C84 1.501(10) . ? 
C82 C83 1.380(9) . ? 
C82 H82 0.9500 . ? 
C83 H83 0.9500 . ? 
C84 H84A 0.9800 . ? 
C84 H84B 0.9800 . ? 
C84 H84C 0.9800 . ? 
N91 N92 1.322(7) . ? 
N91 C95 1.345(8) . ? 
N92 C92 1.342(8) . ? 
C92 C93 1.398(9) . ? 
C92 C106 1.473(9) . ? 
C93 C94 1.378(9) . ? 
C93 H93 0.9500 . ? 
C94 C95 1.395(9) . ? 
C94 H94 0.9500 . ? 
C95 C96 1.452(9) . ? 
C96 N93 1.288(8) . ? 
C96 H96 0.9500 . ? 
N93 C98 1.428(8) . ? 
C98 C103 1.383(10) . ? 
C98 C99 1.393(9) . ? 
C99 C100 1.385(9) . ? 
C99 H99 0.9500 . ? 
C100 C101 1.383(10) . ? 
C100 H100 0.9500 . ? 
C101 C102 1.399(11) . ? 
C101 C104 1.508(10) . ? 
C102 C103 1.372(10) . ? 
C102 H102 0.9500 . ? 
C103 H103 0.9500 . ? 
C104 H10B 0.9800 . ? 
C104 H10C 0.9800 . ? 
C104 H10D 0.9800 . ? 
C106 N94 1.280(9) . ? 
C106 H106 0.9500 . ? 
N94 C108 1.422(9) . ? 
C108 C113 1.385(10) . ? 
C108 C109 1.395(11) . ? 
C109 C110 1.390(11) . ? 
C109 H109 0.9500 . ? 
C110 C111 1.376(12) . ? 
C110 H110 0.9500 . ? 
C111 C112 1.386(12) . ? 
C111 C114 1.511(10) . ? 
C112 C113 1.389(10) . ? 
C112 H112 0.9500 . ? 
C113 H113 0.9500 . ? 
C114 H11A 0.9800 . ? 
C114 H11B 0.9800 . ? 
C114 H11C 0.9800 . ? 
O130 C130 1.228(9) . ? 
C130 N130 1.330(9) . ? 
C130 H130 0.9500 . ? 
N130 C131 1.442(9) . ? 
N130 C132 1.465(9) . ? 
C131 H13B 0.9800 . ? 
C131 H13C 0.9800 . ? 
C131 H13D 0.9800 . ? 
C132 H13E 0.9800 . ? 
C132 H13F 0.9800 . ? 
C132 H13G 0.9800 . ? 
O140 C140 1.233(10) . ? 
C140 N140 1.325(10) . ? 
C140 H140 0.9500 . ? 
N140 C142 1.430(11) . ? 
N140 C141 1.459(11) . ? 
C141 H14G 0.9800 . ? 
C141 H14H 0.9800 . ? 
C141 H14I 0.9800 . ? 
C142 H14J 0.9800 . ? 
C142 H14K 0.9800 . ? 
C142 H14L 0.9800 . ? 
O150 C150 1.216(10) . ? 
C150 N150 1.316(10) . ? 
C150 H150 0.9500 . ? 
N150 C152 1.452(11) . ? 
N150 C151 1.459(10) . ? 
C151 H15A 0.9800 . ? 
C151 H15B 0.9800 . ? 
C151 H15C 0.9800 . ? 
C152 H15D 0.9800 . ? 
C152 H15E 0.9800 . ? 
C152 H15F 0.9800 . ? 
O160 C160 1.207(9) . ? 
C160 N160 1.345(9) . ? 
C160 H160 0.9500 . ? 
N160 C161 1.443(9) . ? 
N160 C162 1.444(9) . ? 
C161 H16A 0.9800 . ? 
C161 H16B 0.9800 . ? 
C161 H16C 0.9800 . ? 
C162 H16D 0.9800 . ? 
C162 H16E 0.9800 . ? 
C162 H16F 0.9800 . ? 
B1 F12 1.377(8) . ? 
B1 F14 1.383(8) . ? 
B1 F13 1.388(8) . ? 
B1 F11 1.398(8) . ? 
B2 F21 1.372(10) . ? 
B2 F24 1.386(10) . ? 
B2 F22 1.387(11) . ? 
B2 F23 1.391(11) . ? 
B3 F34 1.316(10) . ? 
B3 F37 1.324(14) . ? 
B3 F32 1.358(9) . ? 
B3 F35 1.365(14) . ? 
B3 F36 1.372(14) . ? 
B3 F31 1.378(9) . ? 
B3 F33 1.406(10) . ? 
B4 F45 1.319(13) . ? 
B4 F42 1.320(9) . ? 
B4 F43 1.335(9) . ? 
B4 F47 1.362(14) . ? 
B4 F41 1.388(8) . ? 
B4 F44 1.393(9) . ? 
B4 F46 1.396(13) . ? 
 
loop_ 
 _geom_angle_atom_site_label_1 
 _geom_angle_atom_site_label_2 
 _geom_angle_atom_site_label_3 
 _geom_angle 
 _geom_angle_site_symmetry_1 
 _geom_angle_site_symmetry_3 
 _geom_angle_publ_flag 
N61 Ag1 N1 126.58(19) . . y 
N61 Ag1 N3 146.2(2) . . y 
N1 Ag1 N3 72.3(2) . . y 
N61 Ag1 N63 72.10(18) . . y 
N1 Ag1 N63 140.72(19) . . y 
N3 Ag1 N63 112.59(19) . . y 
N93 Ag2 N4 143.9(2) . . y 
N93 Ag2 N2 121.53(18) . . y 
N4 Ag2 N2 72.67(19) . . y 
N93 Ag2 N91 72.64(19) . . y 
N4 Ag2 N91 117.60(19) . . y 
N2 Ag2 N91 143.2(2) . . y 
N64 Ag3 N31 133.40(19) . . y 
N64 Ag3 N62 71.51(19) . . y 
N31 Ag3 N62 142.4(2) . . y 
N64 Ag3 N33 140.08(19) . . y 
N31 Ag3 N33 72.51(19) . . y 
N62 Ag3 N33 106.86(18) . . y 
N34 Ag4 N94 129.58(19) . . y 
N34 Ag4 N92 146.1(2) . . y 
N94 Ag4 N92 72.40(19) . . y 
N34 Ag4 N32 71.64(19) . . y 
N94 Ag4 N32 144.6(2) . . y 
N92 Ag4 N32 105.72(18) . . y 
C5 N1 N2 120.5(6) . . ?
C5 N1 Ag1 114.8(4) . . ? 
N2 N1 Ag1 124.7(4) . . ? 
N1 N2 C2 119.8(5) . . ? 
N1 N2 Ag2 126.1(4) . . ? 
C2 N2 Ag2 114.1(4) . . ? 
N2 C2 C3 122.1(6) . . ? 
N2 C2 C16 116.7(6) . . ? 
C3 C2 C16 121.2(6) . . ? 
C4 C3 C2 117.3(6) . . ? 
C4 C3 H3 121.4 . . ? 
C2 C3 H3 121.4 . . ? 
C3 C4 C5 118.5(7) . . ? 
C3 C4 H4 120.8 . . ? 
C5 C4 H4 120.8 . . ? 
N1 C5 C4 121.9(7) . . ? 
N1 C5 C6 117.3(6) . . ? 
C4 C5 C6 120.8(6) . . ? 
N3 C6 C5 121.2(7) . . ? 
N3 C6 H6 119.4 . . ? 
C5 C6 H6 119.4 . . ? 
C6 N3 C8A 121.5(12) . . ? 
C6 N3 C8 118.5(6) . . ? 
C8A N3 C8 19.9(10) . . ? 
C6 N3 Ag1 113.5(5) . . ? 
C8A N3 Ag1 124.7(11) . . ? 
C8 N3 Ag1 125.3(4) . . ? 
C9 C8 C13 119.1(9) . . ? 
C9 C8 N3 124.6(8) . . ? 
C13 C8 N3 115.8(9) . . ? 
C8 C9 C10 120.0(10) . . ? 
C8 C9 H9 120.0 . . ? 
C10 C9 H9 120.0 . . ? 
C11 C10 C9 120.8(10) . . ? 
C11 C10 H10 119.6 . . ? 
C9 C10 H10 119.6 . . ? 
C10 C11 C12 119.6(9) . . ? 
C10 C11 C14 119.1(10) . . ? 
C12 C11 C14 121.4(10) . . ? 
C11 C12 C13 119.4(10) . . ? 
C11 C12 H12 120.3 . . ? 
C13 C12 H12 120.3 . . ? 
C8 C13 C12 121.1(10) . . ? 
C8 C13 H13 119.4 . . ? 
C12 C13 H13 119.4 . . ? 
C121 O120 C123 115.4(8) . . ? 
O120 C121 C122 113.5(9) . . ? 
O120 C121 H12A 108.9 . . ? 
C122 C121 H12A 108.9 . . ? 
O120 C121 H12B 108.9 . . ? 
C122 C121 H12B 108.9 . . ? 
H12A C121 H12B 107.7 . . ? 
O120 C123 C124 109.9(10) . . ? 
O120 C123 H12F 109.7 . . ? 
C124 C123 H12F 109.7 . . ? 
O120 C123 H12G 109.7 . . ? 
C124 C123 H12G 109.7 . . ? 
H12F C123 H12G 108.2 . . ? 
N3 C8A C9A 123(2) . . ? 
N3 C8A C13A 119(2) . . ? 
C9A C8A C13A 118(2) . . ? 
C8A C9A C10A 120.1(19) . . ? 
C8A C9A H9A 120.0 . . ? 
C10A C9A H9A 120.0 . . ? 
C9A C10A C11A 122.1(19) . . ? 
C9A C10A H10A 119.0 . . ? 
C11A C10A H10A 119.0 . . ? 
C10A C11A C12A 118.3(19) . . ? 
C10A C11A C14A 119(2) . . ? 
C12A C11A C14A 123(2) . . ? 
C11A C12A C13A 119(2) . . ? 
C11A C12A H12K 120.3 . . ? 
C13A C12A H12K 120.3 . . ? 
C8A C13A C12A 122(2) . . ? 
C8A C13A H13A 119.0 . . ? 
C12A C13A H13A 119.0 . . ? 
C11A C14A H14D 109.5 . . ? 
C11A C14A H14E 109.5 . . ? 
H14D C14A H14E 109.5 . . ? 
C11A C14A H14F 109.5 . . ? 
H14D C14A H14F 109.5 . . ? 
H14E C14A H14F 109.5 . . ? 
N170 C170 O170 120(5) . . ? 
N170 C170 H170 120.1 . . ? 
O170 C170 H170 120.1 . . ? 
C170 N170 C171 127(4) . . ? 
C170 N170 C172 118(4) . . ? 
C171 N170 C172 114(4) . . ? 
N170 C171 H17A 109.5 . . ? 
N170 C171 H17B 109.5 . . ? 
H17A C171 H17B 109.5 . . ? 
N170 C171 H17C 109.5 . . ? 
H17A C171 H17C 109.5 . . ? 
H17B C171 H17C 109.5 . . ? 
N170 C172 H17D 109.5 . . ? 
N170 C172 H17E 109.5 . . ? 
H17D C172 H17E 109.5 . . ? 
N170 C172 H17F 109.5 . . ? 
H17D C172 H17F 109.5 . . ? 
H17E C172 H17F 109.5 . . ? 
N4 C16 C2 121.6(6) . . ? 
N4 C16 H16 119.2 . . ? 
C2 C16 H16 119.2 . . ? 
C16 N4 C18 120.7(6) . . ? 
C16 N4 Ag2 114.8(5) . . ? 
C18 N4 Ag2 124.5(4) . . ? 
C19 C18 C23 119.2(7) . . ? 
C19 C18 N4 122.6(7) . . ? 
C23 C18 N4 118.2(6) . . ? 
C18 C19 C20 119.3(8) . . ? 
C18 C19 H19 120.4 . . ? 
C20 C19 H19 120.4 . . ? 
C21 C20 C19 121.8(8) . . ? 
C21 C20 H20 119.1 . . ? 
C19 C20 H20 119.1 . . ? 
C20 C21 C22 118.1(7) . . ? 
C20 C21 C24 121.3(8) . . ? 
C22 C21 C24 120.5(8) . . ? 
C23 C22 C21 120.5(8) . . ? 
C23 C22 H22 119.8 . . ? 
C21 C22 H22 119.8 . . ? 
C22 C23 C18 121.1(8) . . ? 
C22 C23 H23 119.5 . . ? 
C18 C23 H23 119.5 . . ? 
C21 C24 H24A 109.5 . . ? 
C21 C24 H24B 109.5 . . ? 
H24A C24 H24B 109.5 . . ? 
C21 C24 H24C 109.5 . . ? 
H24A C24 H24C 109.5 . . ? 
H24B C24 H24C 109.5 . . ? 
N32 N31 C35 120.5(6) . . ? 
N32 N31 Ag3 124.7(4) . . ? 
C35 N31 Ag3 114.8(4) . . ? 
N31 N32 C32 119.6(6) . . ? 
N31 N32 Ag4 129.1(4) . . ? 
C32 N32 Ag4 110.9(4) . . ? 
N32 C32 C33 122.2(6) . . ? 
N32 C32 C46 117.7(6) . . ? 
C33 C32 C46 120.1(6) . . ? 
C34 C33 C32 118.2(7) . . ? 
C34 C33 H33 120.9 . . ? 
C32 C33 H33 120.9 . . ? 
C33 C34 C35 117.7(7) . . ? 
C33 C34 H34 121.1 . . ? 
C35 C34 H34 121.1 . . ? 
N31 C35 C34 121.8(6) . . ? 
N31 C35 C36 117.7(6) . . ? 
C34 C35 C36 120.5(6) . . ? 
N33 C36 C35 122.2(6) . . ? 
N33 C36 H36 118.9 . . ? 
C35 C36 H36 118.9 . . ? 
C36 N33 C38 120.7(6) . . ? 
C36 N33 Ag3 112.7(5) . . ? 
C38 N33 Ag3 126.5(4) . . ? 
C39 C38 C43 118.4(7) . . ? 
C39 C38 N33 125.0(6) . . ? 
C43 C38 N33 116.4(7) . . ? 
C40 C39 C38 120.4(7) . . ? 
C40 C39 H39 119.8 . . ? 
C38 C39 H39 119.8 . . ? 
C39 C40 C41 121.3(8) . . ? 
C39 C40 H40 119.3 . . ? 
C41 C40 H40 119.3 . . ? 
C40 C41 C42 118.8(7) . . ? 
C40 C41 C44 120.3(8) . . ? 
C42 C41 C44 120.9(8) . . ? 
C41 C42 C43 120.8(7) . . ? 
C41 C42 H42 119.6 . . ? 
C43 C42 H42 119.6 . . ? 
C42 C43 C38 120.2(7) . . ? 
C42 C43 H43 119.9 . . ? 
C38 C43 H43 119.9 . . ? 
C41 C44 H44A 109.5 . . ? 
C41 C44 H44B 109.5 . . ? 
H44A C44 H44B 109.5 . . ? 
C41 C44 H44C 109.5 . . ? 
H44A C44 H44C 109.5 . . ? 
H44B C44 H44C 109.5 . . ? 
N34 C46 C32 122.6(6) . . ? 
N34 C46 H46 118.7 . . ? 
C32 C46 H46 118.7 . . ? 
C46 N34 C48 120.2(6) . . ? 
C46 N34 Ag4 116.1(5) . . ? 
C48 N34 Ag4 123.5(4) . . ? 
C49 C48 C53 118.2(7) . . ? 
C49 C48 N34 124.6(7) . . ? 
C53 C48 N34 117.2(7) . . ? 
C48 C49 C50 121.4(8) . . ? 
C48 C49 H49 119.3 . . ? 
C50 C49 H49 119.3 . . ? 
C51 C50 C49 120.7(8) . . ? 
C51 C50 H50 119.6 . . ? 
C49 C50 H50 119.6 . . ? 
C52 C51 C50 117.8(7) . . ? 
C52 C51 C54 121.0(8) . . ? 
C50 C51 C54 121.1(8) . . ? 
C51 C52 C53 122.1(8) . . ? 
C51 C52 H52 118.9 . . ? 
C53 C52 H52 118.9 . . ? 
C48 C53 C52 119.6(7) . . ? 
C48 C53 H53 120.2 . . ? 
C52 C53 H53 120.2 . . ? 
C51 C54 H54A 109.5 . . ? 
C51 C54 H54B 109.5 . . ? 
H54A C54 H54B 109.5 . . ? 
C51 C54 H54C 109.5 . . ? 
H54A C54 H54C 109.5 . . ? 
H54B C54 H54C 109.5 . . ? 
N62 N61 C65 119.9(5) . . ? 
N62 N61 Ag1 123.8(4) . . ? 
C65 N61 Ag1 116.2(4) . . ? 
N61 N62 C62 120.3(5) . . ? 
N61 N62 Ag3 125.2(4) . . ? 
C62 N62 Ag3 114.4(4) . . ? 
N62 C62 C63 122.0(6) . . ? 
N62 C62 C76 116.7(6) . . ? 
C63 C62 C76 121.4(6) . . ? 
C64 C63 C62 118.4(6) . . ? 
C64 C63 H63 120.8 . . ? 
C62 C63 H63 120.8 . . ? 
C63 C64 C65 117.1(6) . . ? 
C63 C64 H64 121.4 . . ? 
C65 C64 H64 121.4 . . ? 
N61 C65 C64 122.3(6) . . ? 
N61 C65 C66 116.2(6) . . ? 
C64 C65 C66 121.5(6) . . ? 
N63 C66 C65 121.6(6) . . ? 
N63 C66 H66 119.2 . . ? 
C65 C66 H66 119.2 . . ? 
C66 N63 C68 122.0(6) . . ? 
C66 N63 Ag1 113.9(4) . . ? 
C68 N63 Ag1 124.2(4) . . ? 
C73 C68 C69 120.7(6) . . ? 
C73 C68 N63 115.8(6) . . ? 
C69 C68 N63 123.5(6) . . ? 
C70 C69 C68 118.9(7) . . ? 
C70 C69 H69 120.5 . . ? 
C68 C69 H69 120.5 . . ? 
C69 C70 C71 122.3(7) . . ? 
C69 C70 H70 118.8 . . ? 
C71 C70 H70 118.8 . . ? 
C72 C71 C70 117.9(7) . . ? 
C72 C71 C74 120.5(8) . . ? 
C70 C71 C74 121.6(7) . . ? 
C71 C72 C73 120.8(7) . . ? 
C71 C72 H72 119.6 . . ? 
C73 C72 H72 119.6 . . ? 
C68 C73 C72 119.3(7) . . ? 
C68 C73 H73 120.3 . . ? 
C72 C73 H73 120.3 . . ? 
C71 C74 H74A 109.5 . . ? 
C71 C74 H74B 109.5 . . ? 
H74A C74 H74B 109.5 . . ? 
C71 C74 H74C 109.5 . . ? 
H74A C74 H74C 109.5 . . ? 
H74B C74 H74C 109.5 . . ? 
N64 C76 C62 120.2(6) . . ? 
N64 C76 H76 119.9 . . ? 
C62 C76 H76 119.9 . . ? 
C76 N64 C78 122.1(6) . . ? 
C76 N64 Ag3 117.2(4) . . ? 
C78 N64 Ag3 120.6(4) . . ? 
C83 C78 C79 118.6(6) . . ? 
C83 C78 N64 116.6(6) . . ? 
C79 C78 N64 124.7(6) . . ? 
C80 C79 C78 119.5(6) . . ? 
C80 C79 H79 120.2 . . ? 
C78 C79 H79 120.2 . . ? 
C79 C80 C81 121.9(7) . . ? 
C79 C80 H80 119.0 . . ? 
C81 C80 H80 119.0 . . ? 
C82 C81 C80 117.7(6) . . ? 
C82 C81 C84 121.4(7) . . ? 
C80 C81 C84 120.9(7) . . ? 
C83 C82 C81 121.7(7) . . ? 
C83 C82 H82 119.1 . . ? 
C81 C82 H82 119.1 . . ? 
C82 C83 C78 120.5(6) . . ? 
C82 C83 H83 119.7 . . ? 
C78 C83 H83 119.7 . . ? 
C81 C84 H84A 109.5 . . ? 
C81 C84 H84B 109.5 . . ? 
H84A C84 H84B 109.5 . . ? 
C81 C84 H84C 109.5 . . ? 
H84A C84 H84C 109.5 . . ? 
H84B C84 H84C 109.5 . . ? 
N92 N91 C95 121.1(5) . . ? 
N92 N91 Ag2 125.2(4) . . ? 
C95 N91 Ag2 113.2(4) . . ? 
N91 N92 C92 119.1(5) . . ? 
N91 N92 Ag4 126.6(4) . . ? 
C92 N92 Ag4 114.2(4) . . ? 
N92 C92 C93 122.9(6) . . ? 
N92 C92 C106 116.7(6) . . ? 
C93 C92 C106 120.3(6) . . ? 
C94 C93 C92 117.2(6) . . ? 
C94 C93 H93 121.4 . . ? 
C92 C93 H93 121.4 . . ? 
C93 C94 C95 118.0(6) . . ? 
C93 C94 H94 121.0 . . ? 
C95 C94 H94 121.0 . . ? 
N91 C95 C94 121.5(6) . . ? 
N91 C95 C96 117.9(6) . . ? 
C94 C95 C96 120.6(6) . . ? 
N93 C96 C95 120.9(6) . . ? 
N93 C96 H96 119.6 . . ? 
C95 C96 H96 119.6 . . ? 
C96 N93 C98 121.7(6) . . ? 
C96 N93 Ag2 115.3(4) . . ? 
C98 N93 Ag2 123.0(4) . . ? 
C103 C98 C99 118.8(6) . . ? 
C103 C98 N93 117.8(6) . . ? 
C99 C98 N93 123.4(6) . . ? 
C100 C99 C98 120.2(6) . . ? 
C100 C99 H99 119.9 . . ? 
C98 C99 H99 119.9 . . ? 
C101 C100 C99 121.3(7) . . ? 
C101 C100 H100 119.3 . . ? 
C99 C100 H100 119.3 . . ? 
C100 C101 C102 117.8(7) . . ? 
C100 C101 C104 121.2(7) . . ? 
C102 C101 C104 121.1(7) . . ? 
C103 C102 C101 121.3(7) . . ? 
C103 C102 H102 119.4 . . ? 
C101 C102 H102 119.4 . . ? 
C102 C103 C98 120.7(7) . . ? 
C102 C103 H103 119.7 . . ? 
C98 C103 H103 119.7 . . ? 
C101 C104 H10B 109.5 . . ? 
C101 C104 H10C 109.5 . . ? 
H10B C104 H10C 109.5 . . ? 
C101 C104 H10D 109.5 . . ? 
H10B C104 H10D 109.5 . . ? 
H10C C104 H10D 109.5 . . ? 
N94 C106 C92 121.8(6) . . ? 
N94 C106 H106 119.1 . . ? 
C92 C106 H106 119.1 . . ? 
C106 N94 C108 119.9(6) . . ? 
C106 N94 Ag4 114.9(5) . . ? 
C108 N94 Ag4 125.0(5) . . ? 
C113 C108 C109 119.0(7) . . ? 
C113 C108 N94 117.6(7) . . ? 
C109 C108 N94 123.4(7) . . ? 
C110 C109 C108 119.6(8) . . ? 
C110 C109 H109 120.2 . . ? 
C108 C109 H109 120.2 . . ? 
C111 C110 C109 121.8(8) . . ? 
C111 C110 H110 119.1 . . ? 
C109 C110 H110 119.1 . . ? 
C110 C111 C112 118.3(7) . . ? 
C110 C111 C114 120.4(8) . . ? 
C112 C111 C114 121.3(8) . . ? 
C111 C112 C113 120.8(8) . . ? 
C111 C112 H112 119.6 . . ? 
C113 C112 H112 119.6 . . ? 
C108 C113 C112 120.5(8) . . ? 
C108 C113 H113 119.8 . . ? 
C112 C113 H113 119.8 . . ? 
C111 C114 H11A 109.5 . . ? 
C111 C114 H11B 109.5 . . ? 
H11A C114 H11B 109.5 . . ? 
C111 C114 H11C 109.5 . . ? 
H11A C114 H11C 109.5 . . ? 
H11B C114 H11C 109.5 . . ? 
O130 C130 N130 124.1(7) . . ? 
O130 C130 H130 117.9 . . ? 
N130 C130 H130 117.9 . . ? 
C130 N130 C131 122.0(7) . . ? 
C130 N130 C132 119.4(7) . . ? 
C131 N130 C132 118.5(7) . . ? 
N130 C131 H13B 109.5 . . ? 
N130 C131 H13C 109.5 . . ? 
H13B C131 H13C 109.5 . . ? 
N130 C131 H13D 109.5 . . ? 
H13B C131 H13D 109.5 . . ? 
H13C C131 H13D 109.5 . . ? 
N130 C132 H13E 109.5 . . ? 
N130 C132 H13F 109.5 . . ? 
H13E C132 H13F 109.5 . . ? 
N130 C132 H13G 109.5 . . ? 
H13E C132 H13G 109.5 . . ? 
H13F C132 H13G 109.5 . . ? 
O140 C140 N140 125.0(8) . . ? 
O140 C140 H140 117.5 . . ? 
N140 C140 H140 117.5 . . ? 
C140 N140 C142 121.6(8) . . ? 
C140 N140 C141 119.7(8) . . ? 
C142 N140 C141 118.5(8) . . ? 
N140 C141 H14G 109.5 . . ? 
N140 C141 H14H 109.5 . . ? 
H14G C141 H14H 109.5 . . ? 
N140 C141 H14I 109.5 . . ? 
H14G C141 H14I 109.5 . . ? 
H14H C141 H14I 109.5 . . ? 
N140 C142 H14J 109.5 . . ? 
N140 C142 H14K 109.5 . . ? 
H14J C142 H14K 109.5 . . ? 
N140 C142 H14L 109.5 . . ? 
H14J C142 H14L 109.5 . . ? 
H14K C142 H14L 109.5 . . ? 
O150 C150 N150 126.2(9) . . ? 
O150 C150 H150 116.9 . . ? 
N150 C150 H150 116.9 . . ? 
C150 N150 C152 120.6(8) . . ? 
C150 N150 C151 122.7(8) . . ? 
C152 N150 C151 116.3(8) . . ? 
N150 C151 H15A 109.5 . . ? 
N150 C151 H15B 109.5 . . ? 
H15A C151 H15B 109.5 . . ? 
N150 C151 H15C 109.5 . . ? 
H15A C151 H15C 109.5 . . ? 
H15B C151 H15C 109.5 . . ? 
N150 C152 H15D 109.5 . . ? 
N150 C152 H15E 109.5 . . ? 
H15D C152 H15E 109.5 . . ? 
N150 C152 H15F 109.5 . . ? 
H15D C152 H15F 109.5 . . ? 
H15E C152 H15F 109.5 . . ? 
O160 C160 N160 125.6(8) . . ? 
O160 C160 H160 117.2 . . ? 
N160 C160 H160 117.2 . . ? 
C160 N160 C161 118.8(7) . . ? 
C160 N160 C162 122.2(7) . . ? 
C161 N160 C162 117.6(6) . . ? 
N160 C161 H16A 109.5 . . ? 
N160 C161 H16B 109.5 . . ? 
H16A C161 H16B 109.5 . . ? 
N160 C161 H16C 109.5 . . ? 
H16A C161 H16C 109.5 . . ? 
H16B C161 H16C 109.5 . . ? 
N160 C162 H16D 109.5 . . ? 
N160 C162 H16E 109.5 . . ? 
H16D C162 H16E 109.5 . . ? 
N160 C162 H16F 109.5 . . ? 
H16D C162 H16F 109.5 . . ? 
H16E C162 H16F 109.5 . . ? 
F12 B1 F14 110.4(6) . . ? 
F12 B1 F13 110.4(6) . . ? 
F14 B1 F13 110.7(6) . . ? 
F12 B1 F11 108.6(5) . . ? 
F14 B1 F11 108.5(6) . . ? 
F13 B1 F11 108.3(6) . . ? 
F21 B2 F24 112.7(7) . . ? 
F21 B2 F22 108.4(8) . . ? 
F24 B2 F22 106.7(7) . . ? 
F21 B2 F23 110.4(7) . . ? 
F24 B2 F23 110.2(8) . . ? 
F22 B2 F23 108.3(7) . . ? 
F34 B3 F37 141.1(14) . . ? 
F34 B3 F32 111.8(11) . . ? 
F37 B3 F32 62(2) . . ? 
F34 B3 F35 62.3(14) . . ? 
F37 B3 F35 115(2) . . ? 
F32 B3 F35 54.8(15) . . ? 
F34 B3 F36 45.1(11) . . ? 
F37 B3 F36 110.3(18) . . ? 
F32 B3 F36 136.8(12) . . ? 
F35 B3 F36 105.0(15) . . ? 
F34 B3 F31 109.5(7) . . ? 
F37 B3 F31 107.8(13) . . ? 
F32 B3 F31 112.3(7) . . ? 
F35 B3 F31 108.1(12) . . ? 
F36 B3 F31 110.3(11) . . ? 
F34 B3 F33 108.6(10) . . ? 
F37 B3 F33 46.4(19) . . ? 
F32 B3 F33 104.4(7) . . ? 
F35 B3 F33 141.4(13) . . ? 
F36 B3 F33 66.3(12) . . ? 
F31 B3 F33 110.1(7) . . ? 
F45 B4 F42 55.7(15) . . ? 
F45 B4 F43 133.7(12) . . ? 
F42 B4 F43 113.8(8) . . ? 
F45 B4 F47 115.8(16) . . ? 
F42 B4 F47 146.1(12) . . ? 
F43 B4 F47 44.4(12) . . ? 
F45 B4 F41 113.2(11) . . ? 
F42 B4 F41 109.6(6) . . ? 
F43 B4 F41 112.5(6) . . ? 
F47 B4 F41 103.7(11) . . ? 
F45 B4 F44 51.4(14) . . ? 
F42 B4 F44 105.3(8) . . ? 
F43 B4 F44 104.4(8) . . ? 
F47 B4 F44 67.3(13) . . ? 
F41 B4 F44 110.9(6) . . ? 
F45 B4 F46 109.4(17) . . ? 
F42 B4 F46 57.0(14) . . ? 
F43 B4 F46 63.5(14) . . ? 
F47 B4 F46 107.7(16) . . ? 
F41 B4 F46 106.4(10) . . ? 
F44 B4 F46 142.5(11) . . ? 
 
loop_ 
 _geom_torsion_atom_site_label_1 
 _geom_torsion_atom_site_label_2 
 _geom_torsion_atom_site_label_3 
 _geom_torsion_atom_site_label_4 
 _geom_torsion 
 _geom_torsion_site_symmetry_1 
 _geom_torsion_site_symmetry_2 
 _geom_torsion_site_symmetry_3 
 _geom_torsion_site_symmetry_4 
 _geom_torsion_publ_flag 
N61 Ag1 N1 C5 -152.5(5) . . . . ? 
N3 Ag1 N1 C5 -4.4(5) . . . . ? 
N63 Ag1 N1 C5 99.8(5) . . . . ? 
N61 Ag1 N1 N2 27.5(6) . . . . ? 
N3 Ag1 N1 N2 175.6(6) . . . . ? 
N63 Ag1 N1 N2 -80.2(6) . . . . ? 
C5 N1 N2 C2 -2.0(9) . . . . ? 
Ag1 N1 N2 C2 178.0(5) . . . . ? 
C5 N1 N2 Ag2 -179.9(5) . . . . ? 
Ag1 N1 N2 Ag2 0.1(7) . . . . ? 
N93 Ag2 N2 N1 32.6(6) . . . . ? 
N4 Ag2 N2 N1 175.9(6) . . . . ? 
N91 Ag2 N2 N1 -70.9(6) . . . . ? 
N93 Ag2 N2 C2 -145.4(4) . . . . ? 
N4 Ag2 N2 C2 -2.1(4) . . . . ? 
N91 Ag2 N2 C2 111.0(5) . . . . ? 
N1 N2 C2 C3 2.2(10) . . . . ? 
Ag2 N2 C2 C3 -179.6(5) . . . . ? 
N1 N2 C2 C16 -177.4(6) . . . . ? 
Ag2 N2 C2 C16 0.7(7) . . . . ? 
N2 C2 C3 C4 -1.3(11) . . . . ? 
C16 C2 C3 C4 178.4(7) . . . . ? 
C2 C3 C4 C5 0.1(11) . . . . ? 
N2 N1 C5 C4 0.8(11) . . . . ? 
Ag1 N1 C5 C4 -179.2(6) . . . . ? 
N2 N1 C5 C6 -178.6(6) . . . . ? 
Ag1 N1 C5 C6 1.4(8) . . . . ? 
C3 C4 C5 N1 0.2(11) . . . . ? 
C3 C4 C5 C6 179.6(7) . . . . ? 
N1 C5 C6 N3 6.1(11) . . . . ? 
C4 C5 C6 N3 -173.4(8) . . . . ? 
C5 C6 N3 C8A 164.8(12) . . . . ? 
C5 C6 N3 C8 -172.5(7) . . . . ? 
C5 C6 N3 Ag1 -9.9(10) . . . . ? 
N61 Ag1 N3 C6 137.8(5) . . . . ? 
N1 Ag1 N3 C6 7.5(5) . . . . ? 
N63 Ag1 N3 C6 -130.9(5) . . . . ? 
N61 Ag1 N3 C8A -36.7(13) . . . . ? 
N1 Ag1 N3 C8A -167.0(12) . . . . ? 
N63 Ag1 N3 C8A 54.6(12) . . . . ? 
N61 Ag1 N3 C8 -61.0(8) . . . . ? 
N1 Ag1 N3 C8 168.7(7) . . . . ? 
N63 Ag1 N3 C8 30.4(7) . . . . ? 
C6 N3 C8 C9 34.0(9) . . . . ? 
C8A N3 C8 C9 138(4) . . . . ? 
Ag1 N3 C8 C9 -126.4(5) . . . . ? 
C6 N3 C8 C13 -138.1(7) . . . . ? 
C8A N3 C8 C13 -34(3) . . . . ? 
Ag1 N3 C8 C13 61.5(7) . . . . ? 
C13 C8 C9 C10 0.02(11) . . . . ? 
N3 C8 C9 C10 -171.8(7) . . . . ? 
C8 C9 C10 C11 -0.01(11) . . . . ? 
C9 C10 C11 C12 0.01(11) . . . . ? 
C9 C10 C11 C14 179.99(8) . . . . ? 
C10 C11 C12 C13 -0.01(11) . . . . ? 
C14 C11 C12 C13 -179.99(8) . . . . ? 
C9 C8 C13 C12 -0.02(11) . . . . ? 
N3 C8 C13 C12 172.5(6) . . . . ? 
C11 C12 C13 C8 0.01(11) . . . . ? 
C123 O120 C121 C122 176.4(10) . . . . ? 
C121 O120 C123 C124 -172.2(11) . . . . ? 
C6 N3 C8A C9A 9(2) . . . . ? 
C8 N3 C8A C9A -78(3) . . . . ? 
Ag1 N3 C8A C9A -176.8(11) . . . . ? 
C6 N3 C8A C13A -176.1(11) . . . . ? 
C8 N3 C8A C13A 97(4) . . . . ? 
Ag1 N3 C8A C13A -2.1(15) . . . . ? 
N3 C8A C9A C10A 174.8(17) . . . . ? 
C13A C8A C9A C10A 0.00(11) . . . . ? 
C8A C9A C10A C11A 0.00(11) . . . . ? 
C9A C10A C11A C12A 0.00(11) . . . . ? 
C9A C10A C11A C14A 180.00(8) . . . . ? 
C10A C11A C12A C13A 0.00(11) . . . . ? 
C14A C11A C12A C13A 180.00(8) . . . . ? 
N3 C8A C13A C12A -175.0(16) . . . . ? 
C9A C8A C13A C12A 0.00(11) . . . . ? 
C11A C12A C13A C8A 0.00(11) . . . . ? 
O170 C170 N170 C171 -1(8) . . . . ? 
O170 C170 N170 C172 -167(4) . . . . ? 
N2 C2 C16 N4 2.6(10) . . . . ? 
C3 C2 C16 N4 -177.0(7) . . . . ? 
C2 C16 N4 C18 177.7(6) . . . . ? 
C2 C16 N4 Ag2 -4.5(8) . . . . ? 
N93 Ag2 N4 C16 123.6(5) . . . . ? 
N2 Ag2 N4 C16 3.5(5) . . . . ? 
N91 Ag2 N4 C16 -138.1(5) . . . . ? 
N93 Ag2 N4 C18 -58.7(6) . . . . ? 
N2 Ag2 N4 C18 -178.8(6) . . . . ? 
N91 Ag2 N4 C18 39.6(6) . . . . ? 
C16 N4 C18 C19 -24.7(11) . . . . ? 
Ag2 N4 C18 C19 157.8(6) . . . . ? 
C16 N4 C18 C23 156.5(7) . . . . ? 
Ag2 N4 C18 C23 -21.0(9) . . . . ? 
C23 C18 C19 C20 -1.2(12) . . . . ? 
N4 C18 C19 C20 -179.9(7) . . . . ? 
C18 C19 C20 C21 -1.2(13) . . . . ? 
C19 C20 C21 C22 2.3(13) . . . . ? 
C19 C20 C21 C24 -178.1(8) . . . . ? 
C20 C21 C22 C23 -1.1(12) . . . . ? 
C24 C21 C22 C23 179.3(7) . . . . ? 
C21 C22 C23 C18 -1.2(11) . . . . ? 
C19 C18 C23 C22 2.3(11) . . . . ? 
N4 C18 C23 C22 -178.8(6) . . . . ? 
N64 Ag3 N31 N32 32.4(6) . . . . ? 
N62 Ag3 N31 N32 -88.6(6) . . . . ? 
N33 Ag3 N31 N32 176.3(5) . . . . ? 
N64 Ag3 N31 C35 -145.9(5) . . . . ? 
N62 Ag3 N31 C35 93.2(6) . . . . ? 
N33 Ag3 N31 C35 -2.0(5) . . . . ? 
C35 N31 N32 C32 -1.4(9) . . . . ? 
Ag3 N31 N32 C32 -179.6(5) . . . . ? 
C35 N31 N32 Ag4 170.0(5) . . . . ? 
Ag3 N31 N32 Ag4 -8.2(7) . . . . ? 
N34 Ag4 N32 N31 179.6(6) . . . . ? 
N94 Ag4 N32 N31 -46.6(7) . . . . ? 
N92 Ag4 N32 N31 35.0(6) . . . . ? 
N34 Ag4 N32 C32 -8.4(4) . . . . ? 
N94 Ag4 N32 C32 125.4(5) . . . . ? 
N92 Ag4 N32 C32 -153.0(4) . . . . ? 
N31 N32 C32 C33 -0.1(10) . . . . ? 
Ag4 N32 C32 C33 -172.9(6) . . . . ? 
N31 N32 C32 C46 -178.6(6) . . . . ? 
Ag4 N32 C32 C46 8.5(7) . . . . ? 
N32 C32 C33 C34 1.5(11) . . . . ? 
C46 C32 C33 C34 180.0(7) . . . . ? 
C32 C33 C34 C35 -1.4(11) . . . . ? 
N32 N31 C35 C34 1.5(10) . . . . ? 
Ag3 N31 C35 C34 179.9(6) . . . . ? 
N32 N31 C35 C36 -177.0(6) . . . . ? 
Ag3 N31 C35 C36 1.4(8) . . . . ? 
C33 C34 C35 N31 -0.1(12) . . . . ? 
C33 C34 C35 C36 178.4(7) . . . . ? 
N31 C35 C36 N33 1.1(11) . . . . ? 
C34 C35 C36 N33 -177.4(7) . . . . ? 
C35 C36 N33 C38 174.0(6) . . . . ? 
C35 C36 N33 Ag3 -2.8(9) . . . . ? 
N64 Ag3 N33 C36 140.7(5) . . . . ? 
N31 Ag3 N33 C36 2.5(5) . . . . ? 
N62 Ag3 N33 C36 -138.2(5) . . . . ? 
N64 Ag3 N33 C38 -35.9(6) . . . . ? 
N31 Ag3 N33 C38 -174.1(6) . . . . ? 
N62 Ag3 N33 C38 45.2(6) . . . . ? 
C36 N33 C38 C39 0.7(11) . . . . ? 
Ag3 N33 C38 C39 177.1(6) . . . . ? 
C36 N33 C38 C43 -175.6(7) . . . . ? 
Ag3 N33 C38 C43 0.8(9) . . . . ? 
C43 C38 C39 C40 1.4(12) . . . . ? 
N33 C38 C39 C40 -174.8(7) . . . . ? 
C38 C39 C40 C41 -0.3(13) . . . . ? 
C39 C40 C41 C42 -1.9(14) . . . . ? 
C39 C40 C41 C44 175.9(8) . . . . ? 
C40 C41 C42 C43 2.9(13) . . . . ? 
C44 C41 C42 C43 -174.9(8) . . . . ? 
C41 C42 C43 C38 -1.7(12) . . . . ? 
C39 C38 C43 C42 -0.5(11) . . . . ? 
N33 C38 C43 C42 176.1(6) . . . . ? 
N32 C32 C46 N34 -2.1(10) . . . . ? 
C33 C32 C46 N34 179.3(7) . . . . ? 
C32 C46 N34 C48 179.1(6) . . . . ? 
C32 C46 N34 Ag4 -6.4(9) . . . . ? 
N94 Ag4 N34 C46 -139.5(5) . . . . ? 
N92 Ag4 N34 C46 98.7(6) . . . . ? 
N32 Ag4 N34 C46 7.7(5) . . . . ? 
N94 Ag4 N34 C48 34.9(6) . . . . ? 
N92 Ag4 N34 C48 -87.0(6) . . . . ? 
N32 Ag4 N34 C48 -178.0(5) . . . . ? 
C46 N34 C48 C49 -17.8(11) . . . . ? 
Ag4 N34 C48 C49 168.1(6) . . . . ? 
C46 N34 C48 C53 163.0(7) . . . . ? 
Ag4 N34 C48 C53 -11.1(9) . . . . ? 
C53 C48 C49 C50 -2.8(12) . . . . ? 
N34 C48 C49 C50 178.0(7) . . . . ? 
C48 C49 C50 C51 0.9(13) . . . . ? 
C49 C50 C51 C52 2.1(13) . . . . ? 
C49 C50 C51 C54 -179.6(8) . . . . ? 
C50 C51 C52 C53 -3.2(13) . . . . ? 
C54 C51 C52 C53 178.5(8) . . . . ? 
C49 C48 C53 C52 1.7(11) . . . . ? 
N34 C48 C53 C52 -179.0(6) . . . . ? 
C51 C52 C53 C48 1.3(12) . . . . ? 
N1 Ag1 N61 N62 35.4(6) . . . . ? 
N3 Ag1 N61 N62 -79.9(6) . . . . ? 
N63 Ag1 N61 N62 176.0(5) . . . . ? 
N1 Ag1 N61 C65 -141.1(5) . . . . ? 
N3 Ag1 N61 C65 103.6(6) . . . . ? 
N63 Ag1 N61 C65 -0.5(5) . . . . ? 
C65 N61 N62 C62 -2.5(9) . . . . ? 
Ag1 N61 N62 C62 -178.8(5) . . . . ? 
C65 N61 N62 Ag3 -178.8(5) . . . . ? 
Ag1 N61 N62 Ag3 4.9(7) . . . . ? 
N64 Ag3 N62 N61 178.7(6) . . . . ? 
N31 Ag3 N62 N61 -42.4(7) . . . . ? 
N33 Ag3 N62 N61 40.6(6) . . . . ? 
N64 Ag3 N62 C62 2.2(4) . . . . ? 
N31 Ag3 N62 C62 141.1(4) . . . . ? 
N33 Ag3 N62 C62 -135.8(5) . . . . ? 
N61 N62 C62 C63 1.7(10) . . . . ? 
Ag3 N62 C62 C63 178.3(5) . . . . ? 
N61 N62 C62 C76 -179.8(6) . . . . ? 
Ag3 N62 C62 C76 -3.2(7) . . . . ? 
N62 C62 C63 C64 -0.2(10) . . . . ? 
C76 C62 C63 C64 -178.6(6) . . . . ? 
C62 C63 C64 C65 -0.4(10) . . . . ? 
N62 N61 C65 C64 1.9(10) . . . . ? 
Ag1 N61 C65 C64 178.5(5) . . . . ? 
N62 N61 C65 C66 -176.8(6) . . . . ? 
Ag1 N61 C65 C66 -0.2(8) . . . . ? 
C63 C64 C65 N61 -0.5(10) . . . . ? 
C63 C64 C65 C66 178.2(6) . . . . ? 
N61 C65 C66 N63 1.4(10) . . . . ? 
C64 C65 C66 N63 -177.3(6) . . . . ? 
C65 C66 N63 C68 179.6(6) . . . . ? 
C65 C66 N63 Ag1 -1.8(8) . . . . ? 
N61 Ag1 N63 C66 1.2(4) . . . . ? 
N1 Ag1 N63 C66 127.6(5) . . . . ? 
N3 Ag1 N63 C66 -143.1(5) . . . . ? 
N61 Ag1 N63 C68 179.7(5) . . . . ? 
N1 Ag1 N63 C68 -53.8(6) . . . . ? 
N3 Ag1 N63 C68 35.5(5) . . . . ? 
C66 N63 C68 C73 -170.8(7) . . . . ? 
Ag1 N63 C68 C73 10.8(9) . . . . ? 
C66 N63 C68 C69 8.7(10) . . . . ? 
Ag1 N63 C68 C69 -169.8(5) . . . . ? 
C73 C68 C69 C70 -2.2(11) . . . . ? 
N63 C68 C69 C70 178.4(7) . . . . ? 
C68 C69 C70 C71 2.9(12) . . . . ? 
C69 C70 C71 C72 -1.8(13) . . . . ? 
C69 C70 C71 C74 178.3(9) . . . . ? 
C70 C71 C72 C73 -0.1(15) . . . . ? 
C74 C71 C72 C73 179.8(10) . . . . ? 
C69 C68 C73 C72 0.4(12) . . . . ? 
N63 C68 C73 C72 179.8(8) . . . . ? 
C71 C72 C73 C68 0.7(14) . . . . ? 
N62 C62 C76 N64 2.5(10) . . . . ? 
C63 C62 C76 N64 -179.0(6) . . . . ? 
C62 C76 N64 C78 -178.1(6) . . . . ? 
C62 C76 N64 Ag3 -0.4(8) . . . . ? 
N31 Ag3 N64 C76 -147.4(5) . . . . ? 
N62 Ag3 N64 C76 -0.9(5) . . . . ? 
N33 Ag3 N64 C76 93.5(5) . . . . ? 
N31 Ag3 N64 C78 30.2(6) . . . . ? 
N62 Ag3 N64 C78 176.8(5) . . . . ? 
N33 Ag3 N64 C78 -88.8(5) . . . . ? 
C76 N64 C78 C83 -178.3(6) . . . . ? 
Ag3 N64 C78 C83 4.1(8) . . . . ? 
C76 N64 C78 C79 3.3(10) . . . . ? 
Ag3 N64 C78 C79 -174.2(5) . . . . ? 
C83 C78 C79 C80 1.3(10) . . . . ? 
N64 C78 C79 C80 179.7(6) . . . . ? 
C78 C79 C80 C81 0.0(11) . . . . ? 
C79 C80 C81 C82 -0.2(11) . . . . ? 
C79 C80 C81 C84 -179.8(7) . . . . ? 
C80 C81 C82 C83 -1.0(11) . . . . ? 
C84 C81 C82 C83 178.6(7) . . . . ? 
C81 C82 C83 C78 2.4(11) . . . . ? 
C79 C78 C83 C82 -2.5(10) . . . . ? 
N64 C78 C83 C82 179.0(6) . . . . ? 
N93 Ag2 N91 N92 175.4(6) . . . . ? 
N4 Ag2 N91 N92 33.1(6) . . . . ? 
N2 Ag2 N91 N92 -64.8(6) . . . . ? 
N93 Ag2 N91 C95 3.3(4) . . . . ? 
N4 Ag2 N91 C95 -139.0(4) . . . . ? 
N2 Ag2 N91 C95 123.1(5) . . . . ? 
C95 N91 N92 C92 -2.1(9) . . . . ? 
Ag2 N91 N92 C92 -173.6(5) . . . . ? 
C95 N91 N92 Ag4 174.2(5) . . . . ? 
Ag2 N91 N92 Ag4 2.6(7) . . . . ? 
N34 Ag4 N92 N91 -40.8(7) . . . . ? 
N94 Ag4 N92 N91 -177.4(6) . . . . ? 
N32 Ag4 N92 N91 39.6(6) . . . . ? 
N34 Ag4 N92 C92 135.7(5) . . . . ? 
N94 Ag4 N92 C92 -1.0(5) . . . . ? 
N32 Ag4 N92 C92 -144.0(5) . . . . ? 
N91 N92 C92 C93 -1.3(10) . . . . ? 
Ag4 N92 C92 C93 -178.0(5) . . . . ? 
N91 N92 C92 C106 178.0(6) . . . . ? 
Ag4 N92 C92 C106 1.3(8) . . . . ? 
N92 C92 C93 C94 3.1(11) . . . . ? 
C106 C92 C93 C94 -176.2(6) . . . . ? 
C92 C93 C94 C95 -1.6(10) . . . . ? 
N92 N91 C95 C94 3.6(10) . . . . ? 
Ag2 N91 C95 C94 176.1(5) . . . . ? 
N92 N91 C95 C96 -177.4(6) . . . . ? 
Ag2 N91 C95 C96 -4.9(8) . . . . ? 
C93 C94 C95 N91 -1.6(10) . . . . ? 
C93 C94 C95 C96 179.3(6) . . . . ? 
N91 C95 C96 N93 3.9(10) . . . . ? 
C94 C95 C96 N93 -177.0(6) . . . . ? 
C95 C96 N93 C98 -178.9(6) . . . . ? 
C95 C96 N93 Ag2 -0.7(8) . . . . ? 
N4 Ag2 N93 C96 111.9(5) . . . . ? 
N2 Ag2 N93 C96 -143.7(4) . . . . ? 
N91 Ag2 N93 C96 -1.4(5) . . . . ? 
N4 Ag2 N93 C98 -69.9(6) . . . . ? 
N2 Ag2 N93 C98 34.5(6) . . . . ? 
N91 Ag2 N93 C98 176.9(5) . . . . ? 
C96 N93 C98 C103 -174.1(6) . . . . ? 
Ag2 N93 C98 C103 7.8(9) . . . . ? 
C96 N93 C98 C99 6.4(10) . . . . ? 
Ag2 N93 C98 C99 -171.7(5) . . . . ? 
C103 C98 C99 C100 2.2(11) . . . . ? 
N93 C98 C99 C100 -178.3(6) . . . . ? 
C98 C99 C100 C101 -1.2(11) . . . . ? 
C99 C100 C101 C102 -0.5(11) . . . . ? 
C99 C100 C101 C104 178.1(7) . . . . ? 
C100 C101 C102 C103 1.1(12) . . . . ? 
C104 C101 C102 C103 -177.4(8) . . . . ? 
C101 C102 C103 C98 -0.1(12) . . . . ? 
C99 C98 C103 C102 -1.5(11) . . . . ? 
N93 C98 C103 C102 178.9(7) . . . . ? 
N92 C92 C106 N94 -0.9(10) . . . . ? 
C93 C92 C106 N94 178.4(7) . . . . ? 
C92 C106 N94 C108 -175.9(6) . . . . ? 
C92 C106 N94 Ag4 0.0(9) . . . . ? 
N34 Ag4 N94 C106 -149.7(5) . . . . ? 
N92 Ag4 N94 C106 0.5(5) . . . . ? 
N32 Ag4 N94 C106 93.0(6) . . . . ? 
N34 Ag4 N94 C108 25.9(7) . . . . ? 
N92 Ag4 N94 C108 176.1(6) . . . . ? 
N32 Ag4 N94 C108 -91.3(6) . . . . ? 
C106 N94 C108 C113 -165.2(7) . . . . ? 
Ag4 N94 C108 C113 19.3(9) . . . . ? 
C106 N94 C108 C109 16.5(12) . . . . ? 
Ag4 N94 C108 C109 -158.9(7) . . . . ? 
C113 C108 C109 C110 -0.7(13) . . . . ? 
N94 C108 C109 C110 177.5(8) . . . . ? 
C108 C109 C110 C111 -0.8(15) . . . . ? 
C109 C110 C111 C112 2.9(15) . . . . ? 
C109 C110 C111 C114 -177.8(9) . . . . ? 
C110 C111 C112 C113 -3.5(13) . . . . ? 
C114 C111 C112 C113 177.2(8) . . . . ? 
C109 C108 C113 C112 0.0(12) . . . . ? 
N94 C108 C113 C112 -178.3(7) . . . . ? 
C111 C112 C113 C108 2.1(13) . . . . ? 
O130 C130 N130 C131 2.6(12) . . . . ? 
O130 C130 N130 C132 -175.5(8) . . . . ? 
O140 C140 N140 C142 -179.0(9) . . . . ? 
O140 C140 N140 C141 -4.0(14) . . . . ? 
O150 C150 N150 C152 4.1(15) . . . . ? 
O150 C150 N150 C151 175.9(9) . . . . ? 
O160 C160 N160 C161 4.0(11) . . . . ? 
O160 C160 N160 C162 170.4(7) . . . . ? 
 
_diffrn_measured_fraction_theta_max    0.999 
_diffrn_reflns_theta_full              26.00 
_diffrn_measured_fraction_theta_full   0.999 
_refine_diff_density_max    1.788 
_refine_diff_density_min   -1.149 
_refine_diff_density_rms    0.128 

#===END
 
data_jrp69agc_squeezetwinfinal 
 
_audit_creation_method            SHELXL-97 
_chemical_name_systematic 
; 
 ? 
; 
_chemical_name_common             ? 
_chemical_melting_point           ? 
_chemical_formula_moiety          ? 
_chemical_formula_sum 
 'C178 H162 Ag8 B7 F28 N32 O16' 
_chemical_formula_weight          4476.03 
 
loop_ 
 _atom_type_symbol 
 _atom_type_description 
 _atom_type_scat_dispersion_real 
 _atom_type_scat_dispersion_imag 
 _atom_type_scat_source 
 'C'  'C'   0.0033   0.0016 
 'International Tables Vol C Tables 4.2.6.8 and 6.1.1.4' 
 'H'  'H'   0.0000   0.0000 
 'International Tables Vol C Tables 4.2.6.8 and 6.1.1.4' 
 'B'  'B'   0.0013   0.0007 
 'International Tables Vol C Tables 4.2.6.8 and 6.1.1.4' 
 'N'  'N'   0.0061   0.0033 
 'International Tables Vol C Tables 4.2.6.8 and 6.1.1.4' 
 'O'  'O'   0.0106   0.0060 
 'International Tables Vol C Tables 4.2.6.8 and 6.1.1.4' 
 'F'  'F'   0.0171   0.0103 
 'International Tables Vol C Tables 4.2.6.8 and 6.1.1.4' 
 'Ag'  'Ag'  -0.8971   1.1015 
 'International Tables Vol C Tables 4.2.6.8 and 6.1.1.4' 
 
_symmetry_cell_setting            Monoclinic
_symmetry_space_group_name_H-M    C2/c 
 
loop_ 
 _symmetry_equiv_pos_as_xyz 
 'x, y, z' 
 '-x, y, -z+1/2' 
 'x+1/2, y+1/2, z' 
 '-x+1/2, y+1/2, -z+1/2' 
 '-x, -y, -z' 
 'x, -y, z-1/2' 
 '-x+1/2, -y+1/2, -z' 
 'x+1/2, -y+1/2, z-1/2' 
 
_cell_length_a                    60.305(3) 
_cell_length_b                    21.3256(10) 
_cell_length_c                    46.174(3) 
_cell_angle_alpha                 90.00 
_cell_angle_beta                  130.615(6) 
_cell_angle_gamma                 90.00 
_cell_volume                      45076(4) 
_cell_formula_units_Z             8 
_cell_measurement_temperature     83(2) 
_cell_measurement_reflns_used     9951 
_cell_measurement_theta_min       2.260 
_cell_measurement_theta_max       26.352 
 
_exptl_crystal_description        block 
_exptl_crystal_colour             orange
_exptl_crystal_size_max           0.40 
_exptl_crystal_size_mid           0.22 
_exptl_crystal_size_min           0.16 
_exptl_crystal_density_meas       ? 
_exptl_crystal_density_diffrn     1.319 
_exptl_crystal_density_method     'not measured' 
_exptl_crystal_F_000              17960 
_exptl_absorpt_coefficient_mu     0.761 
_exptl_absorpt_correction_type   'multi-scan' 
_exptl_absorpt_correction_T_min   0.736 
_exptl_absorpt_correction_T_max   1.000 
_exptl_absorpt_process_details    'SCALE (Bruker AXS Inc.)' 
 
_exptl_special_details 
; 
 ? 
; 
 
_diffrn_ambient_temperature       83(2) 
_diffrn_radiation_wavelength      0.71073 
_diffrn_radiation_type            MoK\a 
_diffrn_radiation_source          'fine-focus sealed tube' 
_diffrn_radiation_monochromator   graphite 
_diffrn_measurement_device_type     'Bruker Kappa Apex II area detector' 
_diffrn_measurement_method        ? 
_diffrn_detector_area_resol_mean  ? 
_diffrn_standards_number          ? 
_diffrn_standards_interval_count  ? 
_diffrn_standards_interval_time   ? 
_diffrn_standards_decay_%         ? 
_diffrn_reflns_number             295222 
_diffrn_reflns_av_R_equivalents   0.0869 
_diffrn_reflns_av_sigmaI/netI     0.0603 
_diffrn_reflns_limit_h_min        -63 
_diffrn_reflns_limit_h_max        63 
_diffrn_reflns_limit_k_min        -22 
_diffrn_reflns_limit_k_max        22 
_diffrn_reflns_limit_l_min        -48 
_diffrn_reflns_limit_l_max        48 
_diffrn_reflns_theta_min          2.92 
_diffrn_reflns_theta_max          21.97 
_reflns_number_total              27431 
_reflns_number_gt                 17388 
_reflns_threshold_expression      >2sigma(I) 
 
_computing_data_collection        ? 
_computing_cell_refinement        ? 
_computing_data_reduction         ? 
_computing_structure_solution     'SHELXS-97 (Sheldrick, 1990)' 
_computing_structure_refinement   'SHELXL-97 (Sheldrick, 1997)' 
_computing_molecular_graphics     ? 
_computing_publication_material   ? 
 
_refine_special_details 
; 
 Refinement of F^2^ against ALL reflections.  The weighted R-factor wR and 
 goodness of fit S are based on F^2^, conventional R-factors R are based 
 on F, with F set to zero for negative F^2^. The threshold expression of 
 F^2^ > 2sigma(F^2^) is used only for calculating R-factors(gt) etc. and is 
 not relevant to the choice of reflections for refinement.  R-factors based 
 on F^2^ are statistically about twice as large as those based on F, and R- 
 factors based on ALL data will be even larger. 

 Refinements died at R1(observed data, I > 2sig(I))  approx 0.20 with
 fragments of disordered BF4- groups and solvate species. Data were
 subjected to the SQUEEZE procedure of PLATON (Spek etc.). A total void
 volume of 12,520 A^3^ (about 1/4 of total unit-cell volume) containing 4782
 electrons was calculated. Anisotropic refinement, with restraints on the
 geometry of the methoxyphenyl groups, the 7 BF4- (8th SQUEEZEd) anions and 
 the 3 benzene solvate species and on the atomic displacement parameters,
 brought R1 down to approx 0.12, a value somewhat higher than expected based
 R(int) and R(sigma) for the data. The data do not extend to particularly
 high resolution (0.90 A), in part intrinsic to the large unit cell and
 in other part because of the higher average atomic displacement parameter
 (Wilson U value). Inspection of the list of reflections that showed
 exceptionally poor agreement between |F(obs)| and |F(calc)| revealed
 pairs of reflections at the same resolution with |F(obs)| alternately
 much greater than or much less than |F(calc)| and then of reciprocal
 space plots, which showed strong pseudo-orthorhombicity, coupled with
 <E^2^-1> indicating acentricity (or twinning) to the data set, led to
 refinements in which pairs of reflections were related by the twin law
 (-1 0 0; 0 1 0; 1 0 1) -- the beta angle of the pseudo-orthorhombic cell
 is 90.15 deg. Inclusion of a single parameter for the ratio of the twin
 components (final value 0.3015(15) led to R1 = 0.0813, and to greatly
 reduced residual electron density. Since inclusion of twinning had
 improved electron density maps, we returned to the unSQUEEZED data.
 Although twinning, assuming a random distribution of atoms, essentially
 adds random noise to reflections, in this structure, where there are
 two complete molecules in the asymmetric unit the distribution of atoms
 is not entirely random. However, using unSQUEEZED data, incorporating
 twinning, and with a complex model for the disordered BF4- and solvate
 species led to R1 of only 0.11. Thus the parameters reported here are
 on SQUEEZED data.     

; 
 
_refine_ls_structure_factor_coef  Fsqd  
_refine_ls_matrix_type            full 
_refine_ls_weighting_scheme       calc  
_refine_ls_weighting_details 
 'calc w=1/[\s^2^(Fo^2^)+(0.1619P)^2^+0.0000P] where P=(Fo^2^+2Fc^2^)/3' 
_atom_sites_solution_primary      direct 
_atom_sites_solution_secondary    difmap 
_atom_sites_solution_hydrogens    geom 
_refine_ls_hydrogen_treatment     constr 
_refine_ls_extinction_method      none 
_refine_ls_extinction_coef        ? 
_refine_ls_number_reflns          27431 
_refine_ls_number_parameters      2392 
_refine_ls_number_restraints      2345 
_refine_ls_R_factor_all           0.1099 
_refine_ls_R_factor_gt            0.0810 
_refine_ls_wR_factor_ref          0.2463 
_refine_ls_wR_factor_gt           0.2269 
_refine_ls_goodness_of_fit_ref    1.043 
_refine_ls_restrained_S_all       1.035 
_refine_ls_shift/su_max           0.010 
_refine_ls_shift/su_mean          0.000 
 
loop_ 
 _atom_site_label 
 _atom_site_type_symbol 
 _atom_site_fract_x 
 _atom_site_fract_y 
 _atom_site_fract_z 
 _atom_site_U_iso_or_equiv 
 _atom_site_adp_type 
 _atom_site_occupancy 
 _atom_site_symmetry_multiplicity 
 _atom_site_calc_flag 
 _atom_site_refinement_flags 
 _atom_site_disorder_assembly 
 _atom_site_disorder_group 
Ag1 Ag 0.60196(2) 0.21593(5) 0.67921(3) 0.0610(3) Uani 1 1 d . . . 
Ag2 Ag 0.65586(2) 0.20910(6) 0.79214(3) 0.0692(3) Uani 1 1 d . . . 
Ag3 Ag 0.61057(2) 0.03686(5) 0.70298(3) 0.0653(3) Uani 1 1 d . . . 
Ag4 Ag 0.67061(2) 0.03091(5) 0.81623(3) 0.0656(3) Uani 1 1 d . . . 
N1 N 0.6518(2) 0.2060(5) 0.7183(3) 0.053(3) Uani 1 1 d U . . 
N2 N 0.6696(2) 0.2015(5) 0.7580(3) 0.060(3) Uani 1 1 d U . . 
C2 C 0.6996(3) 0.1917(7) 0.7778(4) 0.068(4) Uani 1 1 d U . . 
C3 C 0.7106(3) 0.1927(8) 0.7601(5) 0.083(4) Uani 1 1 d U . . 
H3 H 0.7311 0.1886 0.7749 0.099 Uiso 1 1 calc R . . 
C4 C 0.6925(3) 0.1996(8) 0.7202(5) 0.088(5) Uani 1 1 d U . . 
H4 H 0.7000 0.1988 0.7074 0.105 Uiso 1 1 calc R . . 
C5 C 0.6627(3) 0.2078(7) 0.7009(4) 0.064(4) Uani 1 1 d U . . 
C6 C 0.6423(3) 0.2150(7) 0.6606(4) 0.075(4) Uani 1 1 d U . . 
H6 H 0.6494 0.2189 0.6473 0.090 Uiso 1 1 calc R . . 
N3 N 0.6147(2) 0.2163(5) 0.6417(3) 0.056(3) Uani 1 1 d U . . 
C8 C 0.5949(3) 0.2216(3) 0.6019(4) 0.055(3) Uani 1 1 d DU . . 
C9 C 0.6029(3) 0.2238(4) 0.5801(4) 0.088(5) Uani 1 1 d DU . . 
H9 H 0.6230 0.2217 0.5923 0.105 Uiso 1 1 calc R . . 
C10 C 0.5820(3) 0.2292(4) 0.5402(4) 0.085(5) Uani 1 1 d DU . . 
H10 H 0.5878 0.2307 0.5254 0.102 Uiso 1 1 calc R . . 
C11 C 0.5533(3) 0.2322(3) 0.5232(4) 0.081(4) Uani 1 1 d DU . . 
C12 C 0.5455(3) 0.2300(5) 0.5451(4) 0.096(5) Uani 1 1 d DU . . 
H12 H 0.5254 0.2322 0.5330 0.115 Uiso 1 1 calc R . . 
C13 C 0.5661(3) 0.2247(4) 0.5845(4) 0.068(4) Uani 1 1 d DU . . 
H13 H 0.5602 0.2232 0.5992 0.082 Uiso 1 1 calc R . . 
O1 O 0.5347(3) 0.2375(5) 0.4835(4) 0.151(6) Uani 1 1 d DU . . 
C14 C 0.5062(4) 0.2425(15) 0.4659(7) 0.202(13) Uani 1 1 d DU . . 
H14A H 0.4947 0.2458 0.4383 0.303 Uiso 1 1 calc R . . 
H14B H 0.5031 0.2799 0.4752 0.303 Uiso 1 1 calc R . . 
H14C H 0.5000 0.2052 0.4715 0.303 Uiso 1 1 calc R . . 
C16 C 0.7172(3) 0.1857(6) 0.8186(4) 0.060(3) Uani 1 1 d U . . 
H16 H 0.7374 0.1759 0.8340 0.072 Uiso 1 1 calc R . . 
N4 N 0.7062(2) 0.1934(5) 0.8343(3) 0.057(3) Uani 1 1 d U . . 
C18 C 0.7231(2) 0.1878(3) 0.8744(4) 0.057(3) Uani 1 1 d DU . . 
C19 C 0.7528(2) 0.1803(4) 0.8995(3) 0.060(3) Uani 1 1 d DU . . 
H19 H 0.7630 0.1749 0.8905 0.072 Uiso 1 1 calc R . . 
C20 C 0.7677(3) 0.1808(4) 0.9383(4) 0.067(4) Uani 1 1 d DU . . 
H20 H 0.7883 0.1756 0.9556 0.080 Uiso 1 1 calc R . . 
C21 C 0.7539(3) 0.1884(3) 0.9527(4) 0.084(5) Uani 1 1 d DU . . 
C22 C 0.7239(3) 0.1959(4) 0.9271(4) 0.080(4) Uani 1 1 d DU . . 
H22 H 0.7139 0.2012 0.9364 0.096 Uiso 1 1 calc R . . 
C23 C 0.7084(3) 0.1958(4) 0.8885(4) 0.073(4) Uani 1 1 d DU . . 
H23 H 0.6877 0.2010 0.8713 0.088 Uiso 1 1 calc R . . 
O2 O 0.7665(2) 0.1896(5) 0.9905(3) 0.098(4) Uani 1 1 d DU . . 
C24 C 0.7973(3) 0.1905(9) 1.0163(4) 0.104(6) Uani 1 1 d DU . . 
H24A H 0.8046 0.1482 1.0185 0.155 Uiso 1 1 calc R . . 
H24B H 0.8045 0.2045 1.0413 0.155 Uiso 1 1 calc R . . 
H24C H 0.8041 0.2193 1.0069 0.155 Uiso 1 1 calc R . . 
N31 N 0.6603(2) 0.0421(5) 0.7378(3) 0.059(3) Uani 1 1 d U . . 
N32 N 0.6793(2) 0.0317(5) 0.7743(3) 0.058(3) Uani 1 1 d U . . 
C32 C 0.7083(3) 0.0263(7) 0.7912(4) 0.067(4) Uani 1 1 d U . . 
C33 C 0.7173(3) 0.0299(7) 0.7703(5) 0.083(5) Uani 1 1 d U . . 
H33 H 0.7375 0.0279 0.7828 0.100 Uiso 1 1 calc R . . 
C34 C 0.6971(4) 0.0362(8) 0.7320(5) 0.092(5) Uani 1 1 d U . . 
H34 H 0.7022 0.0358 0.7165 0.111 Uiso 1 1 calc R . . 
C35 C 0.6680(3) 0.0434(7) 0.7164(5) 0.071(4) Uani 1 1 d U . . 
C36 C 0.6452(3) 0.0517(7) 0.6760(4) 0.071(4) Uani 1 1 d U . . 
H36 H 0.6503 0.0594 0.6606 0.086 Uiso 1 1 calc R . . 
N33 N 0.6184(3) 0.0489(5) 0.6601(3) 0.063(3) Uani 1 1 d U . . 
C38 C 0.5947(3) 0.0547(3) 0.6193(4) 0.053(3) Uani 1 1 d DU . . 
C39 C 0.5996(2) 0.0619(3) 0.5942(3) 0.049(3) Uani 1 1 d DU . . 
H39 H 0.6189 0.0646 0.6032 0.059 Uiso 1 1 calc R . . 
C40 C 0.5753(2) 0.0653(3) 0.5549(3) 0.055(3) Uani 1 1 d DU . . 
H40 H 0.5782 0.0703 0.5371 0.066 Uiso 1 1 calc R . . 
C41 C 0.5482(3) 0.0614(3) 0.5427(4) 0.080(4) Uani 1 1 d DU . . 
C42 C 0.5437(3) 0.0542(4) 0.5684(4) 0.083(4) Uani 1 1 d DU . . 
H42 H 0.5243 0.0516 0.5592 0.099 Uiso 1 1 calc R . . 
C43 C 0.5663(3) 0.0508(4) 0.6058(4) 0.055(3) Uani 1 1 d DU . . 
H43 H 0.5630 0.0458 0.6232 0.066 Uiso 1 1 calc R . . 
O31 O 0.5233(2) 0.0643(5) 0.5045(3) 0.095(3) Uani 1 1 d DU . . 
C44 C 0.5278(4) 0.0572(10) 0.4788(4) 0.110(6) Uani 1 1 d DU . . 
H44A H 0.5355 0.0963 0.4773 0.165 Uiso 1 1 calc R . . 
H44B H 0.5092 0.0469 0.4536 0.165 Uiso 1 1 calc R . . 
H44C H 0.5418 0.0233 0.4874 0.165 Uiso 1 1 calc R . . 
C46 C 0.7307(3) 0.0199(6) 0.8353(4) 0.066(4) Uani 1 1 d U . . 
H46 H 0.7508 0.0121 0.8485 0.080 Uiso 1 1 calc R . . 
N34 N 0.7211(2) 0.0254(5) 0.8536(3) 0.060(3) Uani 1 1 d U . . 
C48 C 0.7412(3) 0.0230(3) 0.8936(4) 0.065(4) Uani 1 1 d DU . . 
C49 C 0.7708(3) 0.0222(4) 0.9151(4) 0.082(4) Uani 1 1 d DU . . 
H49 H 0.7787 0.0243 0.9029 0.098 Uiso 1 1 calc R . . 
C50 C 0.7893(4) 0.0183(4) 0.9545(4) 0.092(5) Uani 1 1 d DU . . 
H50 H 0.8099 0.0178 0.9693 0.110 Uiso 1 1 calc R . . 
C51 C 0.7778(3) 0.0153(4) 0.9717(4) 0.088(5) Uani 1 1 d DU . . 
C52 C 0.7481(4) 0.0160(5) 0.9514(5) 0.108(6) Uani 1 1 d DU . . 
H52 H 0.7402 0.0139 0.9636 0.129 Uiso 1 1 calc R . . 
C53 C 0.7301(4) 0.0199(5) 0.9113(5) 0.087(5) Uani 1 1 d DU . . 
H53 H 0.7095 0.0204 0.8963 0.105 Uiso 1 1 calc R . . 
O32 O 0.7999(3) 0.0116(6) 1.0115(4) 0.140(5) Uani 1 1 d DU . . 
C54 C 0.7913(5) 0.0188(12) 1.0308(5) 0.147(9) Uani 1 1 d DU . . 
H54A H 0.8081 0.0162 1.0582 0.220 Uiso 1 1 calc R . . 
H54B H 0.7772 -0.0142 1.0238 0.220 Uiso 1 1 calc R . . 
H54C H 0.7819 0.0599 1.0250 0.220 Uiso 1 1 calc R . . 
N61 N 0.5746(2) 0.1638(6) 0.6910(3) 0.059(3) Uani 1 1 d U . . 
N62 N 0.5790(2) 0.1028(5) 0.7001(3) 0.046(2) Uani 1 1 d U . . 
C62 C 0.5636(3) 0.0749(7) 0.7078(4) 0.068(4) Uani 1 1 d U . . 
C63 C 0.5425(3) 0.1110(7) 0.7051(4) 0.068(4) Uani 1 1 d U . . 
H63 H 0.5314 0.0926 0.7107 0.081 Uiso 1 1 calc R . . 
C64 C 0.5385(4) 0.1727(8) 0.6945(5) 0.080(4) Uani 1 1 d U . . 
H64 H 0.5239 0.1969 0.6914 0.096 Uiso 1 1 calc R . . 
C65 C 0.5550(3) 0.1978(7) 0.6886(4) 0.051(3) Uani 1 1 d U . . 
C66 C 0.5545(3) 0.2632(7) 0.6804(4) 0.056(3) Uani 1 1 d U . . 
H66 H 0.5414 0.2906 0.6789 0.067 Uiso 1 1 calc R . . 
N63 N 0.5707(2) 0.2846(5) 0.6752(3) 0.047(3) Uani 1 1 d U . . 
C68 C 0.5697(2) 0.3501(6) 0.6654(3) 0.063(3) Uani 1 1 d DU . . 
C76 C 0.5684(3) 0.0083(7) 0.7167(4) 0.065(4) Uani 1 1 d U . . 
H76 H 0.5577 -0.0126 0.7224 0.078 Uiso 1 1 calc R . . 
N64 N 0.5860(3) -0.0216(6) 0.7171(3) 0.059(3) Uani 1 1 d U . . 
C78 C 0.5917(3) -0.0861(6) 0.7258(3) 0.066(4) Uani 1 1 d DU . . 
C79 C 0.6164(3) -0.1091(7) 0.7338(3) 0.091(5) Uani 1 1 d DU . . 
H79 H 0.6288 -0.0820 0.7336 0.109 Uiso 1 1 calc R . . 
C80 C 0.6233(4) -0.1729(7) 0.7424(3) 0.094(5) Uani 1 1 d DU . . 
H80 H 0.6403 -0.1893 0.7480 0.112 Uiso 1 1 calc R . . 
C81 C 0.6053(3) -0.2115(6) 0.7427(2) 0.092(5) Uani 1 1 d DU . . 
C82 C 0.5806(4) -0.1874(7) 0.7346(3) 0.110(6) Uani 1 1 d DU . . 
H82 H 0.5682 -0.2144 0.7348 0.133 Uiso 1 1 calc R . . 
C83 C 0.5735(4) -0.1242(7) 0.7260(3) 0.097(5) Uani 1 1 d DU . . 
H83 H 0.5564 -0.1079 0.7204 0.117 Uiso 1 1 calc R . . 
O62 O 0.6135(4) -0.2734(6) 0.7513(3) 0.150(6) Uani 1 1 d DU . . 
C84 C 0.6004(6) -0.3059(11) 0.7628(8) 0.209(13) Uani 1 1 d DU . . 
H84A H 0.6043 -0.2842 0.7844 0.314 Uiso 1 1 calc R . . 
H84B H 0.6083 -0.3485 0.7704 0.314 Uiso 1 1 calc R . . 
H84C H 0.5792 -0.3077 0.7415 0.314 Uiso 1 1 calc R . . 
N91 N 0.6280(2) 0.1455(5) 0.7982(3) 0.053(3) Uani 1 1 d U . . 
N92 N 0.6333(2) 0.0842(5) 0.8069(3) 0.050(3) Uani 1 1 d U . . 
C92 C 0.6162(3) 0.0509(8) 0.8107(4) 0.072(4) Uani 1 1 d U . . 
C93 C 0.5949(4) 0.0764(8) 0.8082(5) 0.084(4) Uani 1 1 d U . . 
H93 H 0.5837 0.0522 0.8119 0.100 Uiso 1 1 calc R . . 
C94 C 0.5895(3) 0.1416(9) 0.7996(5) 0.091(5) Uani 1 1 d U . . 
H94 H 0.5746 0.1632 0.7971 0.109 Uiso 1 1 calc R . . 
C95 C 0.6078(3) 0.1715(6) 0.7953(4) 0.055(3) Uani 1 1 d U . . 
C96 C 0.6041(3) 0.2393(7) 0.7866(4) 0.069(4) Uani 1 1 d U . . 
H96 H 0.5892 0.2617 0.7838 0.083 Uiso 1 1 calc R . . 
N93 N 0.6210(2) 0.2687(6) 0.7827(3) 0.055(3) Uani 1 1 d U . . 
C98 C 0.6172(2) 0.3333(7) 0.7738(3) 0.063(3) Uani 1 1 d DU . . 
C99 C 0.6022(2) 0.3749(7) 0.7788(3) 0.085(5) Uani 1 1 d DU . . 
H99 H 0.5927 0.3608 0.7878 0.102 Uiso 1 1 calc R . . 
C100 C 0.6015(3) 0.4363(8) 0.7705(3) 0.107(6) Uani 1 1 d DU . . 
H100 H 0.5912 0.4645 0.7740 0.128 Uiso 1 1 calc R . . 
C101 C 0.6145(2) 0.4598(7) 0.7576(2) 0.092(5) Uani 1 1 d DU . . 
C102 C 0.6294(3) 0.4206(7) 0.7523(3) 0.083(4) Uani 1 1 d DU . . 
H102 H 0.6388 0.4357 0.7433 0.100 Uiso 1 1 calc R . . 
C103 C 0.6304(3) 0.3580(7) 0.7606(3) 0.077(4) Uani 1 1 d DU . . 
H103 H 0.6408 0.3302 0.7570 0.093 Uiso 1 1 calc R . . 
O91 O 0.6120(2) 0.5238(5) 0.7503(3) 0.110(4) Uani 1 1 d DU . . 
C104 C 0.6253(5) 0.5428(9) 0.7353(7) 0.160(9) Uani 1 1 d DU . . 
H90A H 0.6117 0.5695 0.7129 0.240 Uiso 1 1 calc R . . 
H90B H 0.6302 0.5057 0.7279 0.240 Uiso 1 1 calc R . . 
H90C H 0.6431 0.5664 0.7548 0.240 Uiso 1 1 calc R . . 
C106 C 0.6235(3) -0.0168(7) 0.8199(4) 0.058(3) Uani 1 1 d U . . 
H106 H 0.6122 -0.0430 0.8226 0.070 Uiso 1 1 calc R . . 
N94 N 0.6451(2) -0.0394(5) 0.8242(3) 0.059(3) Uani 1 1 d U . . 
C108 C 0.6529(3) -0.1036(6) 0.8328(3) 0.073(4) Uani 1 1 d DU . . 
C109 C 0.6756(3) -0.1216(8) 0.8336(4) 0.127(7) Uani 1 1 d DU . . 
H109 H 0.6853 -0.0916 0.8300 0.153 Uiso 1 1 calc R . . 
C110 C 0.6837(4) -0.1845(9) 0.8398(4) 0.171(8) Uani 1 1 d DU . . 
H110 H 0.6991 -0.1963 0.8403 0.206 Uiso 1 1 calc R . . 
C111 C 0.6709(4) -0.2300(8) 0.8451(3) 0.158(8) Uani 1 1 d DU . . 
C112 C 0.6488(4) -0.2111(7) 0.8442(3) 0.116(6) Uani 1 1 d DU . . 
H112 H 0.6392 -0.2414 0.8479 0.139 Uiso 1 1 calc R . . 
C113 C 0.6400(3) -0.1503(7) 0.8382(3) 0.094(5) Uani 1 1 d DU . . 
H113 H 0.6245 -0.1395 0.8377 0.113 Uiso 1 1 calc R . . 
O92 O 0.6786(4) -0.2927(7) 0.8513(5) 0.278(13) Uani 1 1 d DU . . 
C114 C 0.7079(6) -0.3047(17) 0.8738(13) 0.33(3) Uani 1 1 d DU . . 
H91A H 0.7110 -0.3501 0.8755 0.500 Uiso 1 1 calc R . . 
H91B H 0.7181 -0.2876 0.8994 0.500 Uiso 1 1 calc R . . 
H91C H 0.7155 -0.2850 0.8626 0.500 Uiso 1 1 calc R . . 
Ag5 Ag 0.86578(3) 0.43260(6) 0.93420(4) 0.0820(4) Uani 1 1 d . . . 
Ag6 Ag 0.87148(3) 0.25330(6) 0.92296(3) 0.0836(4) Uani 1 1 d . . . 
Ag7 Ag 0.79766(3) 0.50001(7) 0.92500(4) 0.0991(5) Uani 1 1 d . . . 
Ag8 Ag 0.81323(3) 0.31547(6) 0.93350(4) 0.0894(4) Uani 1 1 d . . . 
N121 N 0.8961(2) 0.3597(5) 0.9852(3) 0.058(3) Uani 1 1 d U . . 
N122 N 0.8966(3) 0.2979(6) 0.9798(3) 0.067(3) Uani 1 1 d U . . 
C122 C 0.9139(3) 0.2610(7) 1.0096(4) 0.064(4) Uani 1 1 d U . . 
C123 C 0.9312(3) 0.2856(8) 1.0474(4) 0.075(4) Uani 1 1 d U . . 
H123 H 0.9432 0.2586 1.0688 0.089 Uiso 1 1 calc R . . 
C124 C 0.9303(3) 0.3476(8) 1.0522(4) 0.072(4) Uani 1 1 d U . . 
H124 H 0.9413 0.3648 1.0771 0.087 Uiso 1 1 calc R . . 
C125 C 0.9128(3) 0.3869(7) 1.0197(4) 0.062(3) Uani 1 1 d U . . 
C126 C 0.9095(3) 0.4511(8) 1.0215(5) 0.065(4) Uani 1 1 d U . . 
H126 H 0.9197 0.4697 1.0459 0.078 Uiso 1 1 calc R . . 
N123 N 0.8931(3) 0.4867(6) 0.9914(4) 0.068(3) Uani 1 1 d U . . 
C128 C 0.88908(14) 0.5512(7) 0.9932(3) 0.065(4) Uani 1 1 d DU . . 
C129 C 0.90516(19) 0.5857(6) 1.0267(3) 0.079(4) Uani 1 1 d DU . . 
H129 H 0.9194 0.5664 1.0508 0.095 Uiso 1 1 calc R . . 
C130 C 0.8997(3) 0.6489(7) 1.0237(5) 0.105(6) Uani 1 1 d DU . . 
H130 H 0.9107 0.6728 1.0466 0.126 Uiso 1 1 calc R . . 
C131 C 0.8799(3) 0.6788(7) 0.9905(4) 0.092(5) Uani 1 1 d DU . . 
C132 C 0.8642(3) 0.6430(7) 0.9575(5) 0.082(4) Uani 1 1 d DU . . 
H132 H 0.8499 0.6618 0.9333 0.098 Uiso 1 1 calc R . . 
C133 C 0.8696(3) 0.5811(7) 0.9605(4) 0.072(4) Uani 1 1 d DU . . 
H133 H 0.8586 0.5572 0.9377 0.086 Uiso 1 1 calc R . . 
O121 O 0.8776(3) 0.7426(6) 0.9934(4) 0.134(5) Uani 1 1 d DU . . 
C134 C 0.8552(5) 0.7724(9) 0.9578(6) 0.153(9) Uani 1 1 d DU . . 
H13A H 0.8366 0.7510 0.9453 0.230 Uiso 1 1 calc R . . 
H13B H 0.8601 0.7703 0.9414 0.230 Uiso 1 1 calc R . . 
H13C H 0.8535 0.8164 0.9623 0.230 Uiso 1 1 calc R . . 
C136 C 0.9148(3) 0.1950(7) 1.0035(4) 0.057(3) Uani 1 1 d U . . 
H136 H 0.9268 0.1672 1.0246 0.068 Uiso 1 1 calc R . . 
N124 N 0.8993(2) 0.1749(5) 0.9696(4) 0.064(3) Uani 1 1 d U . . 
C138 C 0.90111(14) 0.1125(6) 0.9595(3) 0.074(4) Uani 1 1 d DU . . 
C139 C 0.9198(2) 0.0675(7) 0.9857(4) 0.106(6) Uani 1 1 d DU . . 
H139 H 0.9332 0.0779 1.0121 0.127 Uiso 1 1 calc R . . 
C140 C 0.9196(3) 0.0072(7) 0.9745(5) 0.115(6) Uani 1 1 d DU . . 
H140 H 0.9324 -0.0245 0.9923 0.138 Uiso 1 1 calc R . . 
C141 C 0.8997(3) -0.0042(7) 0.9361(5) 0.112(6) Uani 1 1 d DU . . 
C142 C 0.8805(3) 0.0394(8) 0.9087(6) 0.133(7) Uani 1 1 d DU . . 
H142 H 0.8671 0.0290 0.8823 0.160 Uiso 1 1 calc R . . 
C143 C 0.8816(3) 0.1001(8) 0.9216(5) 0.109(6) Uani 1 1 d DU . . 
H143 H 0.8689 0.1320 0.9040 0.131 Uiso 1 1 calc R . . 
O122 O 0.8963(4) -0.0630(7) 0.9194(4) 0.169(6) Uani 1 1 d DU . . 
C144 C 0.9144(7) -0.1085(10) 0.9447(8) 0.215(13) Uani 1 1 d DU . . 
H14D H 0.9137 -0.1096 0.9653 0.323 Uiso 1 1 calc R . . 
H14E H 0.9344 -0.0997 0.9555 0.323 Uiso 1 1 calc R . . 
H14F H 0.9082 -0.1492 0.9317 0.323 Uiso 1 1 calc R . . 
N151 N 0.8325(2) 0.4503(6) 0.9827(3) 0.062(3) Uani 1 1 d U . . 
N152 N 0.8372(2) 0.3889(6) 0.9848(3) 0.070(3) Uani 1 1 d U . . 
C153 C 0.8719(3) 0.3996(8) 1.0520(5) 0.077(4) Uani 1 1 d U . . 
H15A H 0.8855 0.3806 1.0763 0.092 Uiso 1 1 calc R . . 
C155 C 0.8470(3) 0.4871(8) 1.0127(4) 0.064(4) Uani 1 1 d U . . 
C156 C 0.8391(4) 0.5545(8) 1.0051(5) 0.078(4) Uani 1 1 d U . . 
H156 H 0.8498 0.5832 1.0258 0.094 Uiso 1 1 calc R . . 
N153 N 0.8189(3) 0.5749(7) 0.9725(4) 0.081(4) Uani 1 1 d U . . 
C158 C 0.81130(14) 0.6375(8) 0.9662(4) 0.095(5) Uani 1 1 d DU . . 
C159 C 0.8206(2) 0.6833(9) 0.9938(5) 0.138(7) Uani 1 1 d DU . . 
H15B H 0.8344 0.6734 1.0202 0.166 Uiso 1 1 calc R . . 
C160 C 0.8090(4) 0.7450(10) 0.9817(7) 0.180(10) Uani 1 1 d DU . . 
H16A H 0.8150 0.7766 1.0000 0.216 Uiso 1 1 calc R . . 
C161 C 0.7884(4) 0.7594(11) 0.9424(7) 0.184(10) Uani 1 1 d DU . . 
C162 C 0.7787(4) 0.7161(9) 0.9144(7) 0.150(8) Uani 1 1 d DU . . 
H16B H 0.7649 0.7260 0.8880 0.180 Uiso 1 1 calc R . . 
C163 C 0.7907(3) 0.6564(9) 0.9278(5) 0.112(5) Uani 1 1 d DU . . 
H16C H 0.7844 0.6253 0.9090 0.134 Uiso 1 1 calc R . . 
N154 N 0.8468(2) 0.2612(6) 0.9903(4) 0.064(3) Uani 1 1 d U . . 
C168 C 0.85072(10) 0.1980(7) 0.9914(3) 0.072(4) Uani 1 1 d DU . . 
C169 C 0.86824(7) 0.1625(7) 1.0240(3) 0.099(5) Uani 1 1 d DU . . 
H169 H 0.8777 0.1821 1.0480 0.119 Uiso 1 1 calc R . . 
C170 C 0.8725(3) 0.1000(7) 1.0232(5) 0.100(5) Uani 1 1 d DU . . 
H170 H 0.8847 0.0764 1.0462 0.120 Uiso 1 1 calc R . . 
C171 C 0.8592(2) 0.0731(6) 0.9898(4) 0.091(5) Uani 1 1 d DU . . 
C172 C 0.8409(2) 0.1029(6) 0.9544(4) 0.077(4) Uani 1 1 d DU . . 
H172 H 0.8316 0.0826 0.9307 0.093 Uiso 1 1 calc R . . 
C173 C 0.8381(2) 0.1649(6) 0.9583(4) 0.079(4) Uani 1 1 d DU . . 
H173 H 0.8259 0.1883 0.9353 0.095 Uiso 1 1 calc R . . 
O152 O 0.8645(3) 0.0091(6) 0.9922(4) 0.120(5) Uani 1 1 d DU . . 
C174 C 0.8519(5) -0.0225(8) 0.9593(6) 0.125(7) Uani 1 1 d DU . . 
H17A H 0.8308 -0.0249 0.9446 0.188 Uiso 1 1 calc R . . 
H17B H 0.8601 -0.0649 0.9652 0.188 Uiso 1 1 calc R . . 
H17C H 0.8558 -0.0004 0.9444 0.188 Uiso 1 1 calc R . . 
N181 N 0.8168(3) 0.4433(5) 0.8784(4) 0.081(4) Uani 1 1 d U . . 
N182 N 0.7954(3) 0.4608(5) 0.8755(4) 0.085(4) Uani 1 1 d U . . 
C182 C 0.7672(4) 0.4645(7) 0.8419(5) 0.089(5) Uani 1 1 d U . . 
C183 C 0.7626(4) 0.4538(8) 0.8095(6) 0.107(6) Uani 1 1 d U . . 
H183 H 0.7433 0.4553 0.7856 0.129 Uiso 1 1 calc R . . 
C184 C 0.7854(4) 0.4407(7) 0.8102(5) 0.091(4) Uani 1 1 d U . . 
H184 H 0.7825 0.4358 0.7874 0.109 Uiso 1 1 calc R . . 
C185 C 0.8130(3) 0.4351(7) 0.8462(5) 0.086(5) Uani 1 1 d U . . 
C186 C 0.8374(3) 0.4183(7) 0.8493(4) 0.083(4) Uani 1 1 d U . . 
H186 H 0.8342 0.4081 0.8268 0.100 Uiso 1 1 calc R . . 
N183 N 0.8640(3) 0.4167(5) 0.8821(4) 0.073(3) Uani 1 1 d U . . 
C188 C 0.8881(3) 0.4037(4) 0.8865(3) 0.065(3) Uani 1 1 d DU . . 
C189 C 0.8873(3) 0.3895(4) 0.8557(4) 0.069(4) Uani 1 1 d DU . . 
H189 H 0.8690 0.3865 0.8306 0.082 Uiso 1 1 calc R . . 
C190 C 0.9126(3) 0.3801(4) 0.8619(3) 0.068(4) Uani 1 1 d DU . . 
H190 H 0.9115 0.3707 0.8409 0.082 Uiso 1 1 calc R . . 
C191 C 0.9399(3) 0.3841(3) 0.8984(3) 0.065(4) Uani 1 1 d DU . . 
C192 C 0.9401(3) 0.3983(4) 0.9284(4) 0.067(4) Uani 1 1 d DU . . 
H192 H 0.9583 0.4014 0.9536 0.080 Uiso 1 1 calc R . . 
C193 C 0.9150(3) 0.4077(4) 0.9224(4) 0.067(4) Uani 1 1 d DU . . 
H193 H 0.9161 0.4171 0.9435 0.081 Uiso 1 1 calc R . . 
O181 O 0.9666(2) 0.3756(4) 0.9076(3) 0.084(3) Uani 1 1 d DU . . 
C194 C 0.9664(4) 0.3720(9) 0.8770(4) 0.099(6) Uani 1 1 d DU . . 
H19A H 0.9541 0.3368 0.8604 0.149 Uiso 1 1 calc R . . 
H19B H 0.9864 0.3655 0.8869 0.149 Uiso 1 1 calc R . . 
H19C H 0.9586 0.4111 0.8623 0.149 Uiso 1 1 calc R . . 
C196 C 0.7454(3) 0.4847(7) 0.8427(5) 0.085(5) Uani 1 1 d U . . 
H196 H 0.7262 0.4883 0.8188 0.102 Uiso 1 1 calc R . . 
N184 N 0.7486(3) 0.4982(6) 0.8710(4) 0.081(4) Uani 1 1 d U . . 
C198 C 0.7266(3) 0.5155(5) 0.8705(4) 0.089(5) Uani 1 1 d DU . . 
C199 C 0.6973(3) 0.5154(5) 0.8392(5) 0.095(5) Uani 1 1 d DU . . 
H199 H 0.6912 0.5031 0.8151 0.114 Uiso 1 1 calc R . . 
C200 C 0.6763(4) 0.5327(5) 0.8415(5) 0.102(5) Uani 1 1 d DU . . 
H200 H 0.6562 0.5321 0.8192 0.122 Uiso 1 1 calc R . . 
C201 C 0.6843(3) 0.5504(5) 0.8754(5) 0.110(6) Uani 1 1 d DU . . 
C202 C 0.7142(4) 0.5503(7) 0.9069(6) 0.166(8) Uani 1 1 d DU . . 
H202 H 0.7204 0.5626 0.9310 0.199 Uiso 1 1 calc R . . 
C203 C 0.7351(5) 0.5331(7) 0.9047(5) 0.132(7) Uani 1 1 d DU . . 
H203 H 0.7552 0.5336 0.9268 0.158 Uiso 1 1 calc R . . 
O182 O 0.6667(3) 0.5686(7) 0.8824(4) 0.145(6) Uani 1 1 d DU . . 
C204 C 0.6371(3) 0.5783(10) 0.8505(5) 0.124(7) Uani 1 1 d DU . . 
H20A H 0.6356 0.6017 0.8310 0.186 Uiso 1 1 calc R . . 
H20B H 0.6278 0.6023 0.8581 0.186 Uiso 1 1 calc R . . 
H20C H 0.6273 0.5377 0.8401 0.186 Uiso 1 1 calc R . . 
N211 N 0.8239(3) 0.2806(6) 0.8740(4) 0.092(4) Uani 1 1 d U . . 
N212 N 0.8045(3) 0.2957(5) 0.8769(3) 0.078(4) Uani 1 1 d U . . 
C212 C 0.7759(4) 0.3018(7) 0.8474(4) 0.085(4) Uani 1 1 d U . . 
C213 C 0.7662(4) 0.2938(8) 0.8090(4) 0.102(5) Uani 1 1 d U . . 
H213 H 0.7463 0.3001 0.7871 0.122 Uiso 1 1 calc R . . 
C214 C 0.7870(4) 0.2764(8) 0.8047(5) 0.112(6) Uani 1 1 d U . . 
H214 H 0.7815 0.2691 0.7805 0.135 Uiso 1 1 calc R . . 
C215 C 0.8159(4) 0.2710(8) 0.8391(5) 0.096(5) Uani 1 1 d U . . 
C216 C 0.8373(4) 0.2535(7) 0.8376(5) 0.090(5) Uani 1 1 d U . . 
H216 H 0.8316 0.2443 0.8134 0.108 Uiso 1 1 calc R . . 
N213 N 0.8647(3) 0.2490(5) 0.8677(3) 0.069(3) Uani 1 1 d U . . 
C218 C 0.8877(3) 0.2353(4) 0.8681(4) 0.082(4) Uani 1 1 d DU . . 
C219 C 0.8845(4) 0.2239(5) 0.8359(5) 0.093(5) Uani 1 1 d DU . . 
H219 H 0.8655 0.2272 0.8116 0.111 Uiso 1 1 calc R . . 
C220 C 0.9073(3) 0.2082(5) 0.8374(4) 0.082(4) Uani 1 1 d DU . . 
H220 H 0.9046 0.2006 0.8150 0.099 Uiso 1 1 calc R . . 
C221 C 0.9342(3) 0.2043(4) 0.8733(4) 0.087(4) Uani 1 1 d DU . . 
O211 O 0.9584(3) 0.1892(5) 0.8790(3) 0.100(4) Uani 1 1 d DU . . 
C222 C 0.9380(4) 0.2153(5) 0.9056(5) 0.107(6) Uani 1 1 d DU . . 
H222 H 0.9569 0.2121 0.9301 0.128 Uiso 1 1 calc R . . 
C223 C 0.9148(3) 0.2305(5) 0.9023(4) 0.090(5) Uani 1 1 d DU . . 
H223 H 0.9175 0.2381 0.9248 0.108 Uiso 1 1 calc R . . 
O212 O 0.6888(2) 0.3794(5) 0.9115(3) 0.106(4) Uani 1 1 d DU . . 
C224 C 0.9546(4) 0.1758(9) 0.8461(5) 0.119(7) Uani 1 1 d DU . . 
H22A H 0.9386 0.1455 0.8302 0.179 Uiso 1 1 calc R . . 
H22B H 0.9726 0.1581 0.8535 0.179 Uiso 1 1 calc R . . 
H22C H 0.9497 0.2145 0.8315 0.179 Uiso 1 1 calc R . . 
C226 C 0.7553(3) 0.3183(7) 0.8508(5) 0.085(4) Uani 1 1 d U . . 
H226 H 0.7353 0.3232 0.8287 0.101 Uiso 1 1 calc R . . 
N214 N 0.7632(3) 0.3268(5) 0.8836(4) 0.082(4) Uani 1 1 d U . . 
C228 C 0.7434(3) 0.3406(4) 0.8872(4) 0.075(4) Uani 1 1 d DU . . 
C229 C 0.7131(3) 0.3505(4) 0.8576(4) 0.079(4) Uani 1 1 d DU . . 
H229 H 0.7052 0.3482 0.8319 0.094 Uiso 1 1 calc R . . 
C230 C 0.6951(4) 0.3631(4) 0.8649(4) 0.085(5) Uani 1 1 d DU . . 
H230 H 0.6749 0.3693 0.8441 0.102 Uiso 1 1 calc R . . 
C231 C 0.7052(3) 0.3671(3) 0.9013(4) 0.087(5) Uani 1 1 d DU . . 
C232 C 0.7353(3) 0.3574(4) 0.9317(5) 0.096(5) Uani 1 1 d DU . . 
H232 H 0.7431 0.3596 0.9574 0.115 Uiso 1 1 calc R . . 
C233 C 0.7529(3) 0.3449(5) 0.9237(4) 0.072(4) Uani 1 1 d DU . . 
H233 H 0.7731 0.3387 0.9446 0.086 Uiso 1 1 calc R . . 
C234 C 0.6588(3) 0.3877(10) 0.8819(5) 0.119(7) Uani 1 1 d DU . . 
H23A H 0.6556 0.4218 0.8652 0.179 Uiso 1 1 calc R . . 
H23B H 0.6496 0.3983 0.8925 0.179 Uiso 1 1 calc R . . 
H23C H 0.6503 0.3488 0.8670 0.179 Uiso 1 1 calc R . . 
B1 B 0.7918(3) 0.1142(8) 0.8457(5) 0.116(8) Uani 1 1 d DU . . 
F11 F 0.81701(17) 0.1319(4) 0.8526(3) 0.104(3) Uani 1 1 d DU . . 
F12 F 0.7861(2) 0.1565(5) 0.8630(3) 0.111(3) Uani 1 1 d DU . . 
F13 F 0.7951(2) 0.0552(5) 0.8593(3) 0.123(4) Uani 1 1 d DU . . 
F14 F 0.7690(2) 0.1168(6) 0.8064(3) 0.170(6) Uani 1 1 d DU . . 
B2 B 0.6958(3) 0.1149(7) 0.6510(4) 0.083(5) Uani 1 1 d DU . . 
F21 F 0.6860(2) 0.1767(4) 0.6426(3) 0.104(3) Uani 1 1 d DU . . 
F22 F 0.6721(2) 0.0754(4) 0.6362(3) 0.107(3) Uani 1 1 d DU . . 
F23 F 0.7160(2) 0.1063(5) 0.6899(3) 0.127(4) Uani 1 1 d DU . . 
F24 F 0.7074(2) 0.1008(4) 0.6342(3) 0.110(3) Uani 1 1 d DU . . 
B3 B 0.6955(3) 0.8596(7) 0.7581(5) 0.093(6) Uani 1 1 d DU . . 
F31 F 0.6729(2) 0.9014(4) 0.7368(3) 0.119(4) Uani 1 1 d DU . . 
F32 F 0.6859(2) 0.7978(4) 0.7523(3) 0.128(4) Uani 1 1 d DU . . 
F33 F 0.7111(3) 0.8750(6) 0.7954(3) 0.177(6) Uani 1 1 d DU . . 
F34 F 0.7123(3) 0.8646(6) 0.7480(5) 0.208(7) Uani 1 1 d DU . . 
B4 B 0.6852(3) 0.3753(7) 0.7415(4) 0.088(6) Uani 1 1 d DU . . 
F41 F 0.6891(2) 0.3341(5) 0.7673(3) 0.116(3) Uani 1 1 d DU . . 
F42 F 0.6851(3) 0.4360(5) 0.7509(4) 0.137(4) Uani 1 1 d DU . . 
F43 F 0.7068(2) 0.3676(5) 0.7397(3) 0.135(4) Uani 1 1 d DU . . 
F44 F 0.6583(2) 0.3615(6) 0.7061(3) 0.145(5) Uani 1 1 d DU . . 
B5 B 0.4967(3) 0.0152(8) 0.6187(5) 0.106(7) Uani 1 1 d DU . . 
F51 F 0.4744(2) -0.0219(5) 0.5893(3) 0.130(4) Uani 1 1 d DU . . 
F52 F 0.5186(2) 0.0233(6) 0.6177(3) 0.136(4) Uani 1 1 d DU . . 
F53 F 0.5082(2) -0.0182(5) 0.6522(3) 0.131(4) Uani 1 1 d DU . . 
F54 F 0.4868(2) 0.0721(5) 0.6213(3) 0.127(4) Uani 1 1 d DU . . 
B6 B 0.6276(4) 0.2355(9) 0.8824(5) 0.153(12) Uani 1 1 d DU . . 
F61 F 0.6372(2) 0.2682(6) 0.9138(3) 0.135(4) Uani 1 1 d DU . . 
F62 F 0.6499(2) 0.2251(6) 0.8810(3) 0.149(5) Uani 1 1 d DU . . 
F63 F 0.6062(3) 0.2711(6) 0.8504(3) 0.175(6) Uani 1 1 d DU . . 
F64 F 0.6148(3) 0.1794(6) 0.8794(4) 0.173(6) Uani 1 1 d DU . . 
B7 B 0.4720(5) 0.3498(10) 0.6145(6) 0.215(18) Uani 1 1 d DU . . 
F71 F 0.4430(3) 0.3488(8) 0.5949(5) 0.248(9) Uani 1 1 d DU . . 
F72 F 0.4826(3) 0.2904(8) 0.6310(4) 0.222(7) Uani 1 1 d DU . . 
F73 F 0.4746(6) 0.3665(11) 0.5885(7) 0.339(13) Uani 1 1 d DU . . 
F74 F 0.4872(6) 0.3939(11) 0.6427(7) 0.45(2) Uani 1 1 d DU . . 
C241 C 0.4772(3) 0.1649(6) 0.5292(5) 0.133(6) Uani 1 1 d GDU . . 
H241 H 0.4732 0.1224 0.5212 0.160 Uiso 1 1 calc R . . 
C242 C 0.4943(3) 0.1795(9) 0.5676(4) 0.158(8) Uani 1 1 d GDU . . 
H242 H 0.5019 0.1468 0.5859 0.189 Uiso 1 1 calc R . . 
C243 C 0.5002(3) 0.2417(11) 0.5794(4) 0.159(8) Uani 1 1 d GDU . . 
H243 H 0.5118 0.2517 0.6057 0.191 Uiso 1 1 calc R . . 
C244 C 0.4891(4) 0.2894(7) 0.5526(6) 0.189(10) Uani 1 1 d GDU . . 
H244 H 0.4931 0.3320 0.5607 0.227 Uiso 1 1 calc R . . 
C245 C 0.4720(3) 0.2749(6) 0.5142(5) 0.139(7) Uani 1 1 d GDU . . 
H245 H 0.4645 0.3075 0.4959 0.167 Uiso 1 1 calc R . . 
C246 C 0.4661(3) 0.2126(7) 0.5024(3) 0.102(5) Uani 1 1 d GDU . . 
H246 H 0.4545 0.2027 0.4761 0.122 Uiso 1 1 calc R . . 
C251 C 0.7142(3) 0.0353(9) 0.9954(4) 0.144(8) Uani 1 1 d GDU . . 
H251 H 0.7292 0.0455 1.0216 0.173 Uiso 1 1 calc R . . 
C252 C 0.6980(4) 0.0829(6) 0.9687(6) 0.140(7) Uani 1 1 d GDU . . 
H252 H 0.7021 0.1255 0.9767 0.169 Uiso 1 1 calc R . . 
C253 C 0.6760(3) 0.0680(9) 0.9304(5) 0.160(7) Uani 1 1 d GDU . . 
H253 H 0.6650 0.1005 0.9122 0.192 Uiso 1 1 calc R . . 
C254 C 0.6701(3) 0.0057(11) 0.9189(4) 0.157(8) Uani 1 1 d GDU . . 
H254 H 0.6551 -0.0044 0.8927 0.189 Uiso 1 1 calc R . . 
C255 C 0.6863(4) -0.0418(7) 0.9456(5) 0.153(7) Uani 1 1 d GDU . . 
H255 H 0.6823 -0.0844 0.9377 0.184 Uiso 1 1 calc R . . 
C256 C 0.7083(3) -0.0270(7) 0.9839(5) 0.134(7) Uani 1 1 d GDU . . 
H256 H 0.7193 -0.0595 1.0021 0.161 Uiso 1 1 calc R . . 
C261 C 0.5340(5) 0.3763(9) 0.4394(6) 0.189(10) Uani 1 1 d GDU . . 
H26A H 0.5264 0.3406 0.4427 0.227 Uiso 1 1 calc R . . 
C262 C 0.5166(3) 0.4291(11) 0.4208(6) 0.199(11) Uani 1 1 d GDU . . 
H26B H 0.4971 0.4295 0.4114 0.238 Uiso 1 1 calc R . . 
C263 C 0.5277(4) 0.4814(8) 0.4160(5) 0.191(10) Uani 1 1 d GDU . . 
H26C H 0.5158 0.5174 0.4033 0.230 Uiso 1 1 calc R . . 
C264 C 0.5562(5) 0.4808(8) 0.4298(5) 0.185(9) Uani 1 1 d GDU . . 
H26D H 0.5637 0.5165 0.4265 0.222 Uiso 1 1 calc R . . 
C265 C 0.5735(3) 0.4280(10) 0.4484(5) 0.174(9) Uani 1 1 d GDU . . 
H26E H 0.5930 0.4277 0.4579 0.209 Uiso 1 1 calc R . . 
C266 C 0.5624(4) 0.3758(8) 0.4532(5) 0.186(10) Uani 1 1 d GDU . . 
H26F H 0.5743 0.3397 0.4659 0.224 Uiso 1 1 calc R . . 
C154 C 0.8672(3) 0.4625(8) 1.0487(4) 0.069(4) Uani 1 1 d U . . 
H15C H 0.8776 0.4886 1.0706 0.082 Uiso 1 1 calc R . . 
O61 O 0.5685(3) 0.5342(6) 0.6350(4) 0.158(6) Uani 1 1 d DU . . 
C73 C 0.5851(3) 0.3687(6) 0.6545(3) 0.078(4) Uani 1 1 d DU . . 
H73A H 0.5963 0.3381 0.6540 0.094 Uiso 1 1 calc R . . 
C71 C 0.5691(3) 0.4737(7) 0.6449(3) 0.116(6) Uani 1 1 d DU . . 
O151 O 0.7750(5) 0.8208(13) 0.9265(8) 0.287(13) Uani 1 1 d DU . . 
C72 C 0.5852(3) 0.4290(7) 0.6442(3) 0.109(5) Uani 1 1 d DU . . 
H72A H 0.5962 0.4397 0.6368 0.131 Uiso 1 1 calc R . . 
C74 C 0.5810(6) 0.5491(10) 0.6197(7) 0.149(9) Uani 1 1 d DU . . 
H74A H 0.5785 0.5941 0.6139 0.224 Uiso 1 1 calc R . . 
H74B H 0.5716 0.5251 0.5962 0.224 Uiso 1 1 calc R . . 
H74C H 0.6019 0.5390 0.6380 0.224 Uiso 1 1 calc R . . 
C152 C 0.8568(3) 0.3647(7) 1.0198(5) 0.068(4) Uani 1 1 d U . . 
C69 C 0.5538(3) 0.3947(7) 0.6660(3) 0.085(5) Uani 1 1 d DU . . 
H69A H 0.5428 0.3836 0.6734 0.102 Uiso 1 1 calc R . . 
C70 C 0.5535(3) 0.4562(8) 0.6558(3) 0.127(7) Uani 1 1 d DU . . 
H70A H 0.5423 0.4868 0.6563 0.153 Uiso 1 1 calc R . . 
C166 C 0.8608(3) 0.2939(7) 1.0205(5) 0.067(4) Uani 1 1 d U . . 
H16D H 0.8743 0.2735 1.0445 0.080 Uiso 1 1 calc R . . 
C164 C 0.7767(12) 0.8523(18) 0.9545(13) 0.40(4) Uani 1 1 d DU . . 
H16E H 0.7678 0.8939 0.9452 0.607 Uiso 1 1 calc R . . 
H16F H 0.7972 0.8567 0.9777 0.607 Uiso 1 1 calc R . . 
H16G H 0.7662 0.8282 0.9604 0.607 Uiso 1 1 calc R . . 
 
loop_ 
 _atom_site_aniso_label 
 _atom_site_aniso_U_11 
 _atom_site_aniso_U_22 
 _atom_site_aniso_U_33 
 _atom_site_aniso_U_23 
 _atom_site_aniso_U_13 
 _atom_site_aniso_U_12 
Ag1 0.0505(6) 0.0696(7) 0.0720(7) 0.0082(6) 0.0438(6) 0.0109(5) 
Ag2 0.0480(7) 0.0761(8) 0.0848(8) 0.0109(6) 0.0438(6) 0.0104(5) 
Ag3 0.0639(7) 0.0695(7) 0.0771(8) 0.0079(6) 0.0525(7) -0.0009(5) 
Ag4 0.0521(7) 0.0701(7) 0.0794(8) 0.0050(6) 0.0450(6) -0.0040(5) 
N1 0.040(5) 0.058(6) 0.060(6) 0.031(5) 0.031(5) 0.022(5) 
N2 0.052(6) 0.059(6) 0.073(7) 0.014(6) 0.042(6) 0.013(5) 
C2 0.045(7) 0.081(9) 0.080(8) 0.032(7) 0.040(6) 0.008(6) 
C3 0.050(7) 0.116(11) 0.085(9) 0.038(8) 0.045(7) 0.010(7) 
C4 0.059(8) 0.119(11) 0.080(8) 0.018(8) 0.043(7) 0.011(8) 
C5 0.050(7) 0.087(9) 0.071(8) 0.008(7) 0.047(6) 0.003(6) 
C6 0.059(7) 0.105(10) 0.070(8) 0.014(8) 0.046(6) 0.015(7) 
N3 0.056(6) 0.047(6) 0.081(7) 0.014(5) 0.051(5) 0.014(5) 
C8 0.050(7) 0.058(8) 0.067(7) 0.013(6) 0.042(6) 0.014(6) 
C9 0.078(9) 0.104(11) 0.084(9) 0.017(8) 0.054(7) 0.024(8) 
C10 0.089(9) 0.087(10) 0.076(8) 0.028(8) 0.052(8) 0.022(8) 
C11 0.081(9) 0.085(10) 0.055(8) 0.016(7) 0.034(7) 0.007(8) 
C12 0.064(9) 0.120(12) 0.083(9) -0.003(9) 0.038(7) -0.003(8) 
C13 0.086(8) 0.074(9) 0.064(7) -0.004(7) 0.057(7) -0.005(7) 
O1 0.103(10) 0.138(12) 0.139(13) 0.029(10) 0.047(10) -0.012(9) 
C14 0.22(2) 0.20(2) 0.20(2) -0.005(14) 0.144(16) 0.015(15) 
C16 0.042(7) 0.069(8) 0.080(8) 0.010(7) 0.044(6) -0.002(6) 
N4 0.048(6) 0.044(6) 0.066(6) 0.009(5) 0.031(5) 0.004(5) 
C18 0.035(6) 0.060(8) 0.061(7) 0.006(6) 0.026(6) -0.003(6) 
C19 0.050(7) 0.059(8) 0.070(8) 0.017(6) 0.039(6) -0.002(6) 
C20 0.049(7) 0.061(8) 0.068(8) -0.002(7) 0.028(6) -0.004(6) 
C21 0.069(8) 0.102(11) 0.081(10) 0.027(8) 0.048(7) -0.007(8) 
C22 0.066(8) 0.078(9) 0.116(10) 0.012(8) 0.069(8) 0.000(7) 
C23 0.049(7) 0.066(8) 0.100(9) 0.006(8) 0.046(7) -0.010(7) 
O2 0.095(8) 0.129(9) 0.088(8) 0.016(7) 0.067(7) -0.006(7) 
C24 0.073(10) 0.144(13) 0.092(11) 0.005(10) 0.053(9) -0.030(9) 
N31 0.045(6) 0.075(7) 0.053(6) 0.018(5) 0.031(5) 0.010(5) 
N32 0.049(6) 0.063(7) 0.063(6) 0.004(5) 0.037(5) -0.015(5) 
C32 0.046(7) 0.083(9) 0.065(7) 0.024(7) 0.034(6) 0.006(6) 
C33 0.059(8) 0.116(11) 0.090(9) 0.047(8) 0.055(7) 0.008(7) 
C34 0.073(8) 0.122(12) 0.094(9) 0.019(9) 0.060(7) -0.021(8) 
C35 0.070(7) 0.084(9) 0.086(8) 0.024(7) 0.062(7) -0.009(7) 
C36 0.073(7) 0.091(10) 0.078(8) 0.027(7) 0.062(7) -0.002(7) 
N33 0.086(7) 0.049(6) 0.067(6) 0.015(5) 0.055(6) 0.014(6) 
C38 0.070(7) 0.034(6) 0.070(7) 0.006(6) 0.052(6) 0.000(6) 
C39 0.043(6) 0.057(7) 0.057(7) 0.009(6) 0.037(6) -0.001(6) 
C40 0.062(7) 0.065(8) 0.055(7) 0.016(6) 0.046(6) 0.025(6) 
C41 0.078(8) 0.069(9) 0.077(9) 0.008(7) 0.044(8) -0.005(8) 
C42 0.062(8) 0.102(10) 0.103(10) 0.000(9) 0.063(7) -0.002(8) 
C43 0.068(7) 0.060(7) 0.084(8) 0.033(7) 0.069(7) 0.020(6) 
O31 0.076(7) 0.133(10) 0.083(8) 0.028(7) 0.054(7) 0.029(7) 
C44 0.096(12) 0.139(14) 0.085(11) 0.009(10) 0.056(10) 0.018(10) 
C46 0.049(7) 0.065(8) 0.069(7) 0.017(7) 0.031(6) 0.000(6) 
N34 0.033(6) 0.068(7) 0.067(6) 0.007(6) 0.027(5) -0.004(5) 
C48 0.059(7) 0.059(8) 0.061(7) 0.009(6) 0.032(6) -0.006(7) 
C49 0.066(8) 0.108(11) 0.093(9) 0.030(8) 0.062(7) 0.006(8) 
C50 0.073(9) 0.117(12) 0.088(9) 0.014(9) 0.054(8) -0.004(9) 
C51 0.085(9) 0.098(11) 0.084(10) 0.012(8) 0.057(8) -0.003(9) 
C52 0.110(10) 0.137(13) 0.093(10) -0.005(10) 0.073(9) 0.001(10) 
C53 0.071(9) 0.088(10) 0.098(9) 0.008(8) 0.053(8) -0.009(8) 
O32 0.161(13) 0.177(13) 0.088(10) 0.002(9) 0.084(10) 0.002(10) 
C54 0.117(14) 0.188(17) 0.133(15) 0.021(12) 0.080(12) -0.013(12) 
N61 0.052(6) 0.083(7) 0.041(6) 0.001(5) 0.030(5) -0.002(5) 
N62 0.039(5) 0.071(6) 0.038(6) -0.007(5) 0.029(5) -0.007(5) 
C62 0.066(8) 0.087(8) 0.069(9) 0.000(7) 0.051(7) -0.009(7) 
C63 0.052(7) 0.094(8) 0.080(9) -0.037(7) 0.053(7) -0.030(6) 
C64 0.089(10) 0.094(9) 0.084(10) -0.021(8) 0.068(8) -0.013(8) 
C65 0.050(7) 0.083(8) 0.046(7) -0.012(6) 0.043(6) -0.007(6) 
C66 0.046(6) 0.073(6) 0.059(7) -0.008(5) 0.040(5) 0.018(5) 
N63 0.027(5) 0.060(6) 0.053(6) -0.008(5) 0.025(5) 0.013(4) 
C68 0.051(8) 0.077(8) 0.057(8) 0.004(6) 0.032(6) 0.028(6) 
C76 0.078(9) 0.089(8) 0.049(8) 0.003(7) 0.051(7) -0.015(7) 
N64 0.072(7) 0.081(7) 0.038(6) -0.011(5) 0.041(6) -0.025(5) 
C78 0.096(9) 0.061(7) 0.042(7) 0.007(6) 0.046(7) -0.017(6) 
C79 0.109(10) 0.095(9) 0.076(10) 0.029(8) 0.063(9) -0.005(8) 
C80 0.120(11) 0.088(10) 0.087(10) 0.003(8) 0.073(9) 0.006(8) 
C81 0.120(11) 0.061(9) 0.076(10) 0.001(8) 0.055(9) -0.013(8) 
C82 0.133(12) 0.090(10) 0.114(12) 0.012(9) 0.083(11) -0.035(9) 
C83 0.108(11) 0.088(9) 0.103(11) 0.008(9) 0.072(9) -0.019(8) 
O62 0.272(18) 0.100(10) 0.128(10) 0.008(8) 0.152(12) -0.047(10) 
C84 0.22(2) 0.21(2) 0.192(19) -0.004(15) 0.131(15) 0.007(15) 
N91 0.033(5) 0.057(6) 0.063(7) -0.010(5) 0.028(5) -0.006(5) 
N92 0.044(6) 0.076(7) 0.045(6) -0.012(5) 0.035(5) -0.002(5) 
C92 0.062(8) 0.096(8) 0.080(10) -0.025(8) 0.057(8) -0.019(7) 
C93 0.090(9) 0.103(9) 0.107(11) -0.022(8) 0.086(9) -0.011(8) 
C94 0.058(8) 0.105(9) 0.115(12) -0.035(9) 0.059(8) -0.025(7) 
C95 0.043(7) 0.071(7) 0.053(8) -0.018(6) 0.033(6) -0.013(6) 
C96 0.054(8) 0.080(8) 0.074(9) -0.032(7) 0.041(7) 0.004(6) 
N93 0.039(6) 0.081(7) 0.042(6) -0.013(5) 0.025(5) -0.004(5) 
C98 0.054(8) 0.084(8) 0.042(7) -0.011(6) 0.027(6) 0.008(7) 
C99 0.063(9) 0.079(9) 0.104(11) -0.003(8) 0.049(8) 0.017(7) 
C100 0.117(12) 0.090(10) 0.118(12) -0.018(9) 0.078(10) 0.028(9) 
C101 0.099(11) 0.083(10) 0.063(9) -0.001(8) 0.039(8) 0.013(8) 
C102 0.073(9) 0.081(9) 0.059(9) 0.004(7) 0.027(7) 0.007(7) 
C103 0.066(9) 0.100(9) 0.050(8) 0.009(7) 0.031(7) 0.013(8) 
O91 0.106(9) 0.088(9) 0.116(10) 0.015(7) 0.063(8) 0.009(7) 
C104 0.168(17) 0.118(14) 0.159(16) 0.032(12) 0.090(13) 0.036(12) 
C106 0.054(8) 0.087(8) 0.053(8) -0.014(6) 0.043(7) -0.032(6) 
N94 0.047(6) 0.077(7) 0.055(6) -0.002(5) 0.035(6) -0.029(5) 
C108 0.079(9) 0.072(8) 0.056(8) 0.000(7) 0.040(7) -0.031(6) 
C109 0.069(10) 0.097(10) 0.172(15) 0.017(10) 0.059(10) -0.007(8) 
C110 0.115(13) 0.115(12) 0.257(19) 0.047(13) 0.109(12) 0.009(10) 
C111 0.107(12) 0.106(12) 0.215(18) 0.038(12) 0.084(12) -0.006(9) 
C112 0.145(13) 0.084(9) 0.108(12) 0.045(9) 0.077(10) -0.012(9) 
C113 0.120(11) 0.089(9) 0.085(10) 0.018(8) 0.072(9) -0.016(8) 
O92 0.197(18) 0.072(10) 0.41(3) 0.064(13) 0.129(18) -0.035(11) 
C114 0.32(3) 0.30(3) 0.34(3) 0.026(18) 0.20(2) -0.020(18) 
Ag5 0.0844(8) 0.0667(8) 0.0650(8) -0.0013(6) 0.0354(7) 0.0037(6) 
Ag6 0.0859(9) 0.0770(8) 0.0569(7) 0.0059(6) 0.0328(7) -0.0025(6) 
Ag7 0.0741(9) 0.1079(11) 0.0792(9) 0.0137(8) 0.0339(8) -0.0017(7) 
Ag8 0.0681(8) 0.0796(9) 0.0618(8) 0.0062(6) 0.0163(6) 0.0049(6) 
N121 0.057(6) 0.073(7) 0.049(6) 0.010(5) 0.037(5) 0.005(5) 
N122 0.074(7) 0.061(6) 0.071(7) 0.008(5) 0.049(6) 0.013(6) 
C122 0.046(8) 0.081(8) 0.065(8) 0.007(6) 0.036(7) 0.002(6) 
C123 0.066(9) 0.091(9) 0.059(8) 0.011(7) 0.037(7) 0.014(8) 
C124 0.057(8) 0.098(9) 0.056(8) 0.003(7) 0.034(7) 0.005(7) 
C125 0.059(8) 0.086(8) 0.063(8) -0.005(6) 0.049(7) -0.010(7) 
C126 0.059(8) 0.093(8) 0.069(9) -0.006(7) 0.053(7) 0.001(7) 
N123 0.061(7) 0.083(7) 0.091(8) -0.012(6) 0.062(7) -0.004(6) 
C128 0.069(8) 0.081(8) 0.084(9) -0.012(6) 0.067(7) -0.007(6) 
C129 0.078(9) 0.073(8) 0.083(9) -0.034(7) 0.052(7) -0.024(7) 
C130 0.126(13) 0.093(10) 0.092(10) -0.010(8) 0.069(9) -0.015(9) 
C131 0.088(10) 0.091(10) 0.124(11) -0.010(8) 0.081(9) -0.005(8) 
C132 0.067(9) 0.098(9) 0.103(9) 0.001(8) 0.065(8) 0.004(7) 
C133 0.076(9) 0.077(8) 0.089(9) -0.010(7) 0.066(7) -0.005(7) 
O121 0.187(14) 0.081(9) 0.169(14) -0.001(9) 0.133(12) 0.013(9) 
C134 0.154(15) 0.100(13) 0.202(18) -0.007(12) 0.114(13) 0.003(12) 
C136 0.050(8) 0.068(7) 0.063(8) 0.018(6) 0.041(7) -0.006(6) 
N124 0.042(6) 0.057(6) 0.082(8) 0.008(5) 0.036(6) -0.002(5) 
C138 0.058(8) 0.056(7) 0.097(9) 0.006(6) 0.045(7) -0.004(6) 
C139 0.106(11) 0.073(9) 0.111(11) 0.014(8) 0.058(9) 0.007(8) 
C140 0.120(13) 0.066(9) 0.121(11) 0.008(8) 0.062(9) 0.013(9) 
C141 0.118(12) 0.079(10) 0.137(12) -0.015(9) 0.083(10) -0.015(8) 
C142 0.128(14) 0.107(11) 0.124(12) -0.007(9) 0.064(10) 0.005(10) 
C143 0.124(12) 0.104(10) 0.099(9) -0.010(8) 0.072(9) -0.012(9) 
O122 0.257(18) 0.102(10) 0.151(12) 0.011(9) 0.134(13) 0.020(11) 
C144 0.24(2) 0.174(18) 0.23(2) 0.041(15) 0.149(15) 0.019(15) 
N151 0.057(7) 0.085(7) 0.064(7) 0.000(6) 0.047(6) 0.002(6) 
N152 0.050(7) 0.085(7) 0.065(7) 0.011(6) 0.033(6) 0.007(6) 
C153 0.073(9) 0.102(9) 0.063(8) 0.014(7) 0.047(7) 0.003(8) 
C155 0.056(8) 0.092(8) 0.067(8) -0.002(6) 0.050(7) -0.005(7) 
C156 0.076(9) 0.100(9) 0.098(10) -0.007(7) 0.074(8) -0.002(7) 
N153 0.076(8) 0.090(8) 0.100(9) 0.013(7) 0.067(7) 0.001(6) 
C158 0.071(9) 0.107(10) 0.122(11) 0.011(8) 0.070(8) 0.003(8) 
C159 0.160(15) 0.122(11) 0.143(12) -0.005(9) 0.104(11) -0.010(11) 
C160 0.199(18) 0.113(12) 0.211(14) 0.003(12) 0.126(13) -0.006(12) 
C161 0.163(17) 0.154(15) 0.222(16) 0.000(11) 0.119(13) 0.034(13) 
C162 0.145(15) 0.139(13) 0.172(13) 0.039(10) 0.105(12) 0.023(11) 
C163 0.117(12) 0.129(11) 0.118(10) 0.029(9) 0.089(9) 0.012(9) 
N154 0.032(6) 0.068(7) 0.068(7) 0.019(5) 0.022(5) 0.007(5) 
C168 0.064(9) 0.077(8) 0.082(9) 0.011(6) 0.051(7) -0.005(7) 
C169 0.086(10) 0.099(10) 0.089(9) 0.033(8) 0.047(8) 0.029(9) 
C170 0.097(11) 0.095(10) 0.092(9) 0.029(8) 0.054(9) 0.019(9) 
C171 0.058(9) 0.065(9) 0.117(11) 0.021(7) 0.043(8) 0.008(7) 
C172 0.064(9) 0.057(8) 0.101(9) 0.021(7) 0.050(8) -0.001(7) 
C173 0.063(9) 0.077(8) 0.100(9) 0.019(7) 0.054(8) 0.012(7) 
O152 0.094(9) 0.091(9) 0.141(12) 0.022(8) 0.061(9) 0.019(7) 
C174 0.129(14) 0.103(13) 0.154(15) 0.025(11) 0.096(12) 0.010(11) 
N181 0.079(7) 0.055(7) 0.084(8) -0.030(6) 0.042(7) 0.005(6) 
N182 0.076(7) 0.052(7) 0.100(8) -0.020(6) 0.046(6) 0.016(6) 
C182 0.090(9) 0.058(8) 0.082(9) -0.014(8) 0.039(7) 0.017(8) 
C183 0.084(9) 0.099(11) 0.104(10) -0.011(9) 0.046(8) 0.028(9) 
C184 0.091(9) 0.064(9) 0.087(9) -0.003(7) 0.044(7) 0.011(8) 
C185 0.067(8) 0.076(9) 0.089(9) -0.013(8) 0.039(7) 0.025(7) 
C186 0.082(8) 0.074(9) 0.063(9) -0.017(7) 0.033(7) -0.001(8) 
N183 0.065(6) 0.046(6) 0.090(8) -0.001(6) 0.042(6) 0.012(5) 
C188 0.078(7) 0.045(7) 0.048(7) 0.002(6) 0.030(6) -0.001(6) 
C189 0.070(8) 0.067(8) 0.045(7) -0.018(6) 0.027(6) -0.007(7) 
C190 0.085(9) 0.042(7) 0.050(7) -0.021(6) 0.032(7) -0.025(6) 
C191 0.060(8) 0.068(8) 0.050(8) 0.003(6) 0.029(6) -0.001(6) 
C192 0.065(8) 0.058(8) 0.051(7) -0.005(6) 0.026(6) -0.011(6) 
C193 0.063(7) 0.075(9) 0.058(8) -0.013(7) 0.036(6) -0.012(7) 
O181 0.077(7) 0.117(8) 0.054(6) 0.000(5) 0.042(6) -0.018(6) 
C194 0.094(11) 0.129(13) 0.059(9) 0.008(8) 0.043(8) 0.002(9) 
C196 0.054(8) 0.069(9) 0.095(11) -0.016(8) 0.032(8) 0.010(7) 
N184 0.071(7) 0.062(8) 0.085(9) 0.000(6) 0.040(7) 0.005(6) 
C198 0.077(8) 0.076(10) 0.080(9) 0.013(8) 0.037(7) 0.030(8) 
C199 0.069(8) 0.081(10) 0.094(10) -0.014(8) 0.034(7) -0.011(8) 
C200 0.081(9) 0.090(11) 0.099(10) 0.008(9) 0.043(8) 0.008(8) 
C201 0.089(10) 0.104(12) 0.125(12) 0.030(10) 0.064(9) 0.008(9) 
C202 0.125(12) 0.254(19) 0.108(12) -0.007(13) 0.071(9) 0.017(13) 
C203 0.104(11) 0.186(16) 0.087(10) 0.010(11) 0.054(9) 0.030(11) 
O182 0.084(9) 0.244(16) 0.107(10) 0.039(10) 0.062(8) 0.041(10) 
C204 0.084(11) 0.152(14) 0.129(13) 0.039(11) 0.066(10) 0.023(10) 
N211 0.109(9) 0.069(8) 0.082(8) -0.013(7) 0.055(7) 0.018(7) 
N212 0.079(7) 0.054(7) 0.057(7) -0.001(5) 0.024(6) 0.022(6) 
C212 0.083(8) 0.062(8) 0.051(8) -0.008(7) 0.017(7) 0.013(8) 
C213 0.092(10) 0.103(11) 0.049(7) -0.004(8) 0.019(7) 0.028(9) 
C214 0.112(10) 0.098(11) 0.066(8) 0.004(8) 0.031(7) 0.039(9) 
C215 0.097(9) 0.077(10) 0.074(9) -0.009(8) 0.038(8) 0.030(8) 
C216 0.104(9) 0.063(9) 0.079(10) -0.019(8) 0.049(8) 0.011(8) 
N213 0.093(7) 0.047(6) 0.054(7) 0.000(5) 0.042(6) 0.008(6) 
C218 0.098(8) 0.045(8) 0.076(9) -0.017(7) 0.044(7) -0.010(7) 
C219 0.111(10) 0.094(11) 0.068(8) 0.000(8) 0.056(8) 0.002(9) 
C220 0.103(10) 0.064(9) 0.068(8) -0.001(7) 0.050(8) -0.003(8) 
C221 0.107(10) 0.080(10) 0.083(9) -0.005(8) 0.066(8) -0.006(8) 
O211 0.106(9) 0.135(10) 0.062(7) -0.011(6) 0.056(7) 0.000(7) 
C222 0.095(10) 0.122(12) 0.082(9) -0.023(9) 0.048(8) 0.015(9) 
C223 0.110(10) 0.079(9) 0.068(8) 0.003(7) 0.052(7) 0.025(8) 
O212 0.062(7) 0.145(11) 0.086(8) 0.038(7) 0.037(7) 0.017(7) 
C224 0.119(13) 0.112(13) 0.123(14) -0.008(10) 0.077(11) -0.004(10) 
C226 0.063(8) 0.068(9) 0.075(9) 0.006(8) 0.024(7) 0.023(7) 
N214 0.082(8) 0.047(7) 0.070(8) -0.001(6) 0.029(7) 0.009(6) 
C228 0.067(8) 0.041(7) 0.074(9) 0.010(7) 0.027(7) 0.002(7) 
C229 0.068(8) 0.046(7) 0.063(8) 0.005(6) 0.017(6) -0.007(7) 
C230 0.080(9) 0.053(8) 0.074(9) 0.011(7) 0.029(8) 0.001(7) 
C231 0.055(8) 0.076(10) 0.089(10) 0.015(8) 0.029(8) -0.002(7) 
C232 0.074(9) 0.100(11) 0.079(9) 0.023(8) 0.034(7) 0.000(8) 
C233 0.041(7) 0.064(8) 0.066(8) 0.014(7) 0.015(6) 0.003(6) 
C234 0.072(11) 0.160(14) 0.118(13) 0.020(11) 0.059(10) 0.003(10) 
B1 0.090(13) 0.131(15) 0.121(15) -0.029(12) 0.066(12) 0.013(12) 
F11 0.071(6) 0.104(7) 0.153(9) 0.041(6) 0.079(6) 0.019(5) 
F12 0.088(6) 0.153(9) 0.117(8) -0.014(6) 0.078(6) 0.015(6) 
F13 0.132(8) 0.118(8) 0.168(10) -0.003(7) 0.120(8) -0.031(7) 
F14 0.099(8) 0.216(13) 0.086(7) -0.026(7) 0.011(6) 0.086(8) 
B2 0.092(12) 0.085(12) 0.096(12) 0.027(9) 0.072(10) 0.012(10) 
F21 0.114(7) 0.102(7) 0.121(8) -0.001(6) 0.087(7) 0.000(6) 
F22 0.108(7) 0.114(7) 0.124(8) -0.003(6) 0.087(7) -0.013(6) 
F23 0.100(7) 0.145(8) 0.150(10) 0.051(7) 0.088(7) 0.004(6) 
F24 0.128(8) 0.097(7) 0.160(9) 0.029(6) 0.118(8) 0.008(6) 
B3 0.089(12) 0.109(14) 0.089(13) 0.030(11) 0.062(10) 0.002(10) 
F31 0.089(7) 0.106(7) 0.091(7) -0.001(5) 0.026(6) 0.028(6) 
F32 0.139(9) 0.102(7) 0.119(8) -0.002(6) 0.073(7) 0.000(7) 
F33 0.176(12) 0.155(11) 0.080(8) 0.003(7) 0.029(8) -0.037(9) 
F34 0.259(15) 0.209(14) 0.305(18) 0.124(13) 0.250(15) 0.104(12) 
B4 0.062(11) 0.098(13) 0.065(11) -0.012(10) 0.024(9) 0.015(9) 
F41 0.119(8) 0.136(9) 0.109(8) 0.011(6) 0.082(7) -0.006(6) 
F42 0.141(9) 0.118(9) 0.168(11) -0.014(8) 0.107(9) -0.017(7) 
F43 0.094(7) 0.185(11) 0.129(9) 0.053(8) 0.075(7) 0.019(7) 
F44 0.088(7) 0.179(11) 0.098(8) -0.006(7) 0.030(6) 0.034(7) 
B5 0.093(13) 0.129(15) 0.092(14) -0.035(11) 0.058(11) -0.004(12) 
F51 0.088(7) 0.197(11) 0.089(7) -0.011(7) 0.051(6) -0.002(7) 
F52 0.093(8) 0.205(12) 0.134(9) 0.025(8) 0.085(7) 0.026(8) 
F53 0.087(7) 0.188(11) 0.098(8) -0.010(8) 0.052(7) -0.003(7) 
F54 0.108(8) 0.148(10) 0.099(8) -0.014(7) 0.057(7) 0.015(7) 
B6 0.16(2) 0.17(2) 0.127(18) 0.014(15) 0.096(15) -0.021(15) 
F61 0.108(8) 0.214(12) 0.077(7) -0.020(7) 0.057(6) -0.051(8) 
F62 0.106(9) 0.228(14) 0.109(9) -0.014(8) 0.068(7) 0.000(9) 
F63 0.188(13) 0.195(13) 0.132(11) -0.002(10) 0.099(10) -0.010(11) 
F64 0.172(12) 0.189(13) 0.127(10) 0.030(9) 0.084(9) -0.053(10) 
B7 0.24(2) 0.19(2) 0.21(2) -0.068(16) 0.143(18) 0.040(17) 
F71 0.167(14) 0.241(16) 0.258(19) -0.033(14) 0.104(13) 0.047(12) 
F72 0.134(11) 0.295(19) 0.143(12) -0.037(12) 0.049(9) 0.008(12) 
F73 0.43(3) 0.35(3) 0.31(2) -0.08(2) 0.28(2) -0.07(2) 
F74 0.46(3) 0.52(4) 0.40(3) -0.09(3) 0.30(3) -0.01(3) 
C241 0.101(12) 0.201(13) 0.099(11) 0.044(9) 0.066(10) 0.047(11) 
C242 0.146(15) 0.241(15) 0.148(12) 0.026(12) 0.123(12) 0.029(13) 
C243 0.127(14) 0.254(16) 0.146(13) -0.010(11) 0.111(12) 0.019(13) 
C244 0.187(18) 0.236(15) 0.174(14) -0.032(11) 0.130(13) -0.026(14) 
C245 0.116(13) 0.177(12) 0.138(12) -0.029(11) 0.088(11) -0.006(12) 
C246 0.088(10) 0.131(11) 0.112(11) 0.004(8) 0.076(9) -0.003(9) 
C251 0.143(15) 0.173(14) 0.123(12) -0.014(10) 0.090(11) -0.032(12) 
C252 0.120(14) 0.204(14) 0.122(12) 0.009(10) 0.090(10) -0.031(11) 
C253 0.141(14) 0.253(15) 0.153(13) 0.025(12) 0.125(11) 0.009(13) 
C254 0.153(15) 0.265(16) 0.122(12) -0.021(11) 0.120(11) -0.017(13) 
C255 0.146(15) 0.231(14) 0.137(13) -0.049(11) 0.116(11) -0.033(12) 
C256 0.126(13) 0.202(13) 0.119(11) -0.017(11) 0.100(10) -0.031(11) 
C261 0.189(15) 0.205(16) 0.195(18) -0.002(13) 0.134(14) -0.009(13) 
C262 0.176(15) 0.208(18) 0.208(19) -0.008(14) 0.123(14) -0.011(11) 
C263 0.161(14) 0.199(16) 0.190(18) -0.020(13) 0.104(13) -0.008(12) 
C264 0.177(15) 0.187(15) 0.204(18) -0.031(13) 0.130(14) -0.010(12) 
C265 0.178(14) 0.170(16) 0.169(17) -0.016(13) 0.111(13) -0.009(11) 
C266 0.171(14) 0.181(15) 0.195(18) -0.020(13) 0.114(13) -0.018(12) 
C154 0.069(9) 0.093(9) 0.062(8) -0.002(7) 0.051(7) -0.009(7) 
O61 0.259(18) 0.074(9) 0.165(13) 0.012(8) 0.149(13) 0.038(10) 
C73 0.088(9) 0.065(8) 0.087(9) -0.006(7) 0.060(8) 0.016(7) 
C71 0.149(14) 0.078(10) 0.093(11) 0.006(9) 0.067(10) 0.029(9) 
O151 0.32(3) 0.23(2) 0.36(3) 0.04(2) 0.25(2) 0.07(2) 
C72 0.118(12) 0.089(10) 0.111(12) 0.017(9) 0.071(10) 0.016(9) 
C74 0.189(17) 0.142(16) 0.146(15) 0.012(12) 0.122(13) 0.021(12) 
C152 0.060(8) 0.084(8) 0.068(8) 0.011(6) 0.045(7) 0.003(7) 
C69 0.072(9) 0.095(9) 0.070(9) 0.005(8) 0.038(8) 0.034(8) 
C70 0.147(14) 0.093(10) 0.130(14) 0.001(10) 0.085(11) 0.042(10) 
C166 0.049(8) 0.085(8) 0.077(9) 0.019(6) 0.046(7) -0.013(7) 
C164 0.40(4) 0.37(4) 0.42(4) 0.022(19) 0.26(3) -0.017(19) 
 
_geom_special_details 
; 
 All esds (except the esd in the dihedral angle between two l.s. planes) 
 are estimated using the full covariance matrix.  The cell esds are taken 
 into account individually in the estimation of esds in distances, angles 
 and torsion angles; correlations between esds in cell parameters are only 
 used when they are defined by crystal symmetry.  An approximate (isotropic) 
 treatment of cell esds is used for estimating esds involving l.s. planes. 
; 
 
loop_ 
 _geom_bond_atom_site_label_1 
 _geom_bond_atom_site_label_2 
 _geom_bond_distance 
 _geom_bond_site_symmetry_2 
 _geom_bond_publ_flag 
Ag1 N1 2.295(9) . y 
Ag1 N63 2.297(9) . y 
Ag1 N3 2.309(11) . y 
Ag1 N61 2.329(11) . y 
Ag2 N2 2.216(11) . y 
Ag2 N93 2.244(11) . y 
Ag2 N91 2.315(11) . y 
Ag2 N4 2.327(10) . y 
Ag3 N62 2.301(10) . y 
Ag3 N31 2.306(10) . y 
Ag3 N33 2.325(12) . y 
Ag3 N64 2.332(11) . y 
Ag4 N92 2.297(10) . y 
Ag4 N32 2.313(11) . y 
Ag4 N34 2.330(10) . y 
Ag4 N94 2.342(10) . y 
N1 C5 1.332(16) . ?
N1 N2 1.397(15) . ? 
N2 C2 1.412(16) . ? 
C2 C3 1.34(2) . ? 
C2 C16 1.45(2) . ? 
C3 C4 1.41(2) . ? 
C3 H3 0.9500 . ? 
C4 C5 1.404(19) . ? 
C4 H4 0.9500 . ? 
C5 C6 1.42(2) . ? 
C6 N3 1.279(16) . ? 
C6 H6 0.9500 . ? 
N3 C8 1.401(16) . ? 
C8 C13 1.360(14) . ? 
C8 C9 1.366(14) . ? 
C9 C10 1.406(15) . ? 
C9 H9 0.9500 . ? 
C10 C11 1.356(15) . ? 
C10 H10 0.9500 . ? 
C11 C12 1.369(15) . ? 
C11 O1 1.398(15) . ? 
C12 C13 1.388(14) . ? 
C12 H12 0.9500 . ? 
C13 H13 0.9500 . ? 
O1 C14 1.345(17) . ? 
C14 H14A 0.9800 . ? 
C14 H14B 0.9800 . ? 
C14 H14C 0.9800 . ? 
C16 N4 1.276(16) . ? 
C16 H16 0.9500 . ? 
N4 C18 1.422(16) . ? 
C18 C19 1.371(13) . ? 
C18 C23 1.411(14) . ? 
C19 C20 1.385(14) . ? 
C19 H19 0.9500 . ? 
C20 C21 1.370(14) . ? 
C20 H20 0.9500 . ? 
C21 O2 1.378(13) . ? 
C21 C22 1.385(14) . ? 
C22 C23 1.373(14) . ? 
C22 H22 0.9500 . ? 
C23 H23 0.9500 . ? 
O2 C24 1.407(13) . ? 
C24 H24A 0.9800 . ? 
C24 H24B 0.9800 . ? 
C24 H24C 0.9800 . ? 
N31 N32 1.302(14) . ? 
N31 C35 1.336(17) . ? 
N32 C32 1.378(16) . ? 
C32 C33 1.38(2) . ? 
C32 C46 1.55(2) . ? 
C33 C34 1.35(2) . ? 
C33 H33 0.9500 . ? 
C34 C35 1.40(2) . ? 
C34 H34 0.9500 . ? 
C35 C36 1.44(2) . ? 
C36 N33 1.272(17) . ? 
C36 H36 0.9500 . ? 
N33 C38 1.449(16) . ? 
C38 C39 1.377(13) . ? 
C38 C43 1.395(13) . ? 
C39 C40 1.408(13) . ? 
C39 H39 0.9500 . ? 
C40 C41 1.342(14) . ? 
C40 H40 0.9500 . ? 
C41 O31 1.386(13) . ? 
C41 C42 1.386(14) . ? 
C42 C43 1.335(14) . ? 
C42 H42 0.9500 . ? 
C43 H43 0.9500 . ? 
O31 C44 1.385(14) . ? 
C44 H44A 0.9800 . ? 
C44 H44B 0.9800 . ? 
C44 H44C 0.9800 . ? 
C46 N34 1.305(18) . ? 
C46 H46 0.9500 . ? 
N34 C48 1.403(17) . ? 
C48 C53 1.355(14) . ? 
C48 C49 1.367(14) . ? 
C49 C50 1.384(15) . ? 
C49 H49 0.9500 . ? 
C50 C51 1.357(15) . ? 
C50 H50 0.9500 . ? 
C51 C52 1.378(15) . ? 
C51 O32 1.404(15) . ? 
C52 C53 1.410(15) . ? 
C52 H52 0.9500 . ? 
C53 H53 0.9500 . ? 
O32 C54 1.302(15) . ? 
C54 H54A 0.9800 . ? 
C54 H54B 0.9800 . ? 
C54 H54C 0.9800 . ? 
N61 C65 1.332(16) . ? 
N61 N62 1.340(14) . ? 
N62 C62 1.330(16) . ? 
C62 C63 1.42(2) . ? 
C62 C76 1.46(2) . ? 
C63 C64 1.37(2) . ? 
C63 H63 0.9500 . ? 
C64 C65 1.302(19) . ? 
C64 H64 0.9500 . ? 
C65 C66 1.440(19) . ? 
C66 N63 1.234(16) . ? 
C66 H66 0.9500 . ? 
N63 C68 1.457(16) . ? 
C68 C73 1.367(14) . ? 
C68 C69 1.368(14) . ? 
C76 N64 1.226(17) . ? 
C76 H76 0.9500 . ? 
N64 C78 1.410(17) . ? 
C78 C83 1.368(15) . ? 
C78 C79 1.374(15) . ? 
C79 C80 1.403(15) . ? 
C79 H79 0.9500 . ? 
C80 C81 1.366(15) . ? 
C80 H80 0.9500 . ? 
C81 O62 1.374(14) . ? 
C81 C82 1.376(16) . ? 
C82 C83 1.391(15) . ? 
C82 H82 0.9500 . ? 
C83 H83 0.9500 . ? 
O62 C84 1.390(17) . ? 
C84 H84A 0.9800 . ? 
C84 H84B 0.9800 . ? 
C84 H84C 0.9800 . ? 
N91 C95 1.259(15) . ? 
N91 N92 1.344(14) . ? 
N92 C92 1.354(17) . ? 
C92 C93 1.33(2) . ? 
C92 C106 1.49(2) . ? 
C93 C94 1.42(2) . ? 
C93 H93 0.9500 . ? 
C94 C95 1.40(2) . ? 
C94 H94 0.9500 . ? 
C95 C96 1.478(19) . ? 
C96 N93 1.301(18) . ? 
C96 H96 0.9500 . ? 
N93 C98 1.414(17) . ? 
C98 C99 1.386(14) . ? 
C98 C103 1.390(14) . ? 
C99 C100 1.355(15) . ? 
C99 H99 0.9500 . ? 
C100 C101 1.358(15) . ? 
C100 H100 0.9500 . ? 
C101 C102 1.360(15) . ? 
C101 O91 1.391(14) . ? 
C102 C103 1.378(15) . ? 
C102 H102 0.9500 . ? 
C103 H103 0.9500 . ? 
O91 C104 1.413(16) . ? 
C104 H90A 0.9800 . ? 
C104 H90B 0.9800 . ? 
C104 H90C 0.9800 . ? 
C106 N94 1.275(17) . ? 
C106 H106 0.9500 . ? 
N94 C108 1.420(17) . ? 
C108 C113 1.384(14) . ? 
C108 C109 1.396(16) . ? 
C109 C110 1.393(16) . ? 
C109 H109 0.9500 . ? 
C110 C111 1.356(17) . ? 
C110 H110 0.9500 . ? 
C111 C112 1.370(16) . ? 
C111 O92 1.383(16) . ? 
C112 C113 1.358(15) . ? 
C112 H112 0.9500 . ? 
C113 H113 0.9500 . ? 
O92 C114 1.366(18) . ? 
C114 H91A 0.9800 . ? 
C114 H91B 0.9800 . ? 
C114 H91C 0.9800 . ? 
Ag5 N123 2.315(13) . y 
Ag5 N181 2.348(13) . y 
Ag5 N183 2.360(14) . y 
Ag5 N121 2.387(11) . y 
Ag6 N122 2.218(12) . y 
Ag6 N211 2.288(15) . y 
Ag6 N213 2.309(12) . y 
Ag6 N124 2.354(11) . y 
Ag7 N153 2.313(15) . y 
Ag7 N151 2.313(12) . y 
Ag7 N184 2.316(13) . y 
Ag7 N182 2.356(14) . y 
Ag8 N154 2.323(11) . y 
Ag8 N214 2.326(13) . y 
Ag8 N212 2.344(14) . y 
Ag8 N152 2.385(13) . y 
N121 N122 1.344(15) . ? 
N121 C125 1.340(17) . ? 
N122 C122 1.316(17) . ? 
C122 C123 1.42(2) . ? 
C122 C136 1.44(2) . ? 
C123 C124 1.35(2) . ? 
C123 H123 0.9500 . ? 
C124 C125 1.42(2) . ? 
C124 H124 0.9500 . ? 
C125 C126 1.39(2) . ? 
C126 N123 1.302(18) . ? 
C126 H126 0.9500 . ? 
N123 C128 1.409(17) . ? 
C128 C133 1.325(13) . ? 
C128 C129 1.387(13) . ? 
C129 C130 1.371(15) . ? 
C129 H129 0.9500 . ? 
C130 C131 1.345(15) . ? 
C130 H130 0.9500 . ? 
C131 O121 1.381(14) . ? 
C131 C132 1.385(15) . ? 
C132 C133 1.345(14) . ? 
C132 H132 0.9500 . ? 
C133 H133 0.9500 . ? 
O121 C134 1.430(16) . ? 
C134 H13A 0.9800 . ? 
C134 H13B 0.9800 . ? 
C134 H13C 0.9800 . ? 
C136 N124 1.269(17) . ? 
C136 H136 0.9500 . ? 
N124 C138 1.437(17) . ? 
C138 C143 1.355(15) . ? 
C138 C139 1.371(13) . ? 
C139 C140 1.385(15) . ? 
C139 H139 0.9500 . ? 
C140 C141 1.366(15) . ? 
C140 H140 0.9500 . ? 
C141 C142 1.379(16) . ? 
C141 O122 1.418(15) . ? 
C142 C143 1.407(16) . ? 
C142 H142 0.9500 . ? 
C143 H143 0.9500 . ? 
O122 C144 1.356(17) . ? 
C144 H14D 0.9800 . ? 
C144 H14E 0.9800 . ? 
C144 H14F 0.9800 . ? 
N151 C155 1.313(18) . ? 
N151 N152 1.331(15) . ? 
N152 C152 1.339(18) . ? 
C153 C152 1.35(2) . ? 
C153 C154 1.36(2) . ? 
C153 H15A 0.9500 . ? 
C155 C154 1.37(2) . ? 
C155 C156 1.48(2) . ? 
C156 N153 1.244(19) . ? 
C156 H156 0.9500 . ? 
N153 C158 1.38(2) . ? 
C158 C159 1.402(16) . ? 
C158 C163 1.410(15) . ? 
C159 C160 1.423(17) . ? 
C159 H15B 0.9500 . ? 
C160 C161 1.411(18) . ? 
C160 H16A 0.9500 . ? 
C161 C162 1.372(17) . ? 
C161 O151 1.462(18) . ? 
C162 C163 1.395(16) . ? 
C162 H16B 0.9500 . ? 
C163 H16C 0.9500 . ? 
N154 C166 1.271(18) . ? 
N154 C168 1.365(17) . ? 
C168 C169 1.375(11) . ? 
C168 C173 1.378(14) . ? 
C169 C170 1.361(15) . ? 
C169 H169 0.9500 . ? 
C170 C171 1.323(15) . ? 
C170 H170 0.9500 . ? 
C171 O152 1.390(13) . ? 
C171 C172 1.393(14) . ? 
C172 C173 1.358(14) . ? 
C172 H172 0.9500 . ? 
C173 H173 0.9500 . ? 
O152 C174 1.353(15) . ? 
C174 H17A 0.9800 . ? 
C174 H17B 0.9800 . ? 
C174 H17C 0.9800 . ? 
N181 N182 1.258(17) . ? 
N181 C185 1.36(2) . ? 
N182 C182 1.37(2) . ? 
C182 C183 1.36(2) . ? 
C182 C196 1.40(2) . ? 
C183 C184 1.38(2) . ? 
C183 H183 0.9500 . ? 
C184 C185 1.40(2) . ? 
C184 H184 0.9500 . ? 
C185 C186 1.43(2) . ? 
C186 N183 1.306(18) . ? 
C186 H186 0.9500 . ? 
N183 C188 1.361(17) . ? 
C188 C193 1.373(14) . ? 
C188 C189 1.421(14) . ? 
C189 C190 1.374(14) . ? 
C189 H189 0.9500 . ? 
C190 C191 1.395(13) . ? 
C190 H190 0.9500 . ? 
C191 O181 1.388(12) . ? 
C191 C192 1.409(14) . ? 
C192 C193 1.364(14) . ? 
C192 H192 0.9500 . ? 
C193 H193 0.9500 . ? 
O181 C194 1.407(13) . ? 
C194 H19A 0.9800 . ? 
C194 H19B 0.9800 . ? 
C194 H19C 0.9800 . ? 
C196 N184 1.22(2) . ? 
C196 H196 0.9500 . ? 
N184 C198 1.37(2) . ? 
C198 C203 1.356(16) . ? 
C198 C199 1.374(14) . ? 
C199 C200 1.385(16) . ? 
C199 H199 0.9500 . ? 
C200 C201 1.358(16) . ? 
C200 H200 0.9500 . ? 
C201 O182 1.354(15) . ? 
C201 C202 1.397(16) . ? 
C202 C203 1.377(17) . ? 
C202 H202 0.9500 . ? 
C203 H203 0.9500 . ? 
O182 C204 1.407(15) . ? 
C204 H20A 0.9800 . ? 
C204 H20B 0.9800 . ? 
C204 H20C 0.9800 . ? 
N211 N212 1.303(18) . ? 
N211 C215 1.36(2) . ? 
N212 C212 1.336(19) . ? 
C212 C226 1.40(2) . ? 
C212 C213 1.47(2) . ? 
C213 C214 1.44(3) . ? 
C213 H213 0.9500 . ? 
C214 C215 1.40(2) . ? 
C214 H214 0.9500 . ? 
C215 C216 1.39(2) . ? 
C216 N213 1.298(19) . ? 
C216 H216 0.9500 . ? 
N213 C218 1.408(19) . ? 
C218 C223 1.346(15) . ? 
C218 C219 1.386(15) . ? 
C219 C220 1.372(15) . ? 
C219 H219 0.9500 . ? 
C220 C221 1.374(15) . ? 
C220 H220 0.9500 . ? 
C221 O211 1.344(14) . ? 
C221 C222 1.373(15) . ? 
O211 C224 1.410(14) . ? 
C222 C223 1.349(15) . ? 
C222 H222 0.9500 . ? 
C223 H223 0.9500 . ? 
O212 C231 1.373(14) . ? 
O212 C234 1.396(14) . ? 
C224 H22A 0.9800 . ? 
C224 H22B 0.9800 . ? 
C224 H22C 0.9800 . ? 
C226 N214 1.27(2) . ? 
C226 H226 0.9500 . ? 
N214 C228 1.347(19) . ? 
C228 C233 1.383(15) . ? 
C228 C229 1.412(14) . ? 
C229 C230 1.354(15) . ? 
C229 H229 0.9500 . ? 
C230 C231 1.368(15) . ? 
C230 H230 0.9500 . ? 
C231 C232 1.408(15) . ? 
C232 C233 1.361(15) . ? 
C232 H232 0.9500 . ? 
C233 H233 0.9500 . ? 
C234 H23A 0.9800 . ? 
C234 H23B 0.9800 . ? 
C234 H23C 0.9800 . ? 
B1 F13 1.360(15) . ? 
B1 F11 1.385(15) . ? 
B1 F12 1.390(15) . ? 
B1 F14 1.393(15) . ? 
B2 F24 1.376(14) . ? 
B2 F23 1.379(14) . ? 
B2 F22 1.395(14) . ? 
B2 F21 1.394(14) . ? 
B3 F33 1.361(15) . ? 
B3 F34 1.363(15) . ? 
B3 F31 1.371(14) . ? 
B3 F32 1.394(14) . ? 
B4 F43 1.366(15) . ? 
B4 F42 1.366(14) . ? 
B4 F41 1.374(15) . ? 
B4 F44 1.392(14) . ? 
B5 F52 1.364(15) . ? 
B5 F51 1.378(15) . ? 
B5 F54 1.391(15) . ? 
B5 F53 1.406(16) . ? 
B6 F61 1.354(16) . ? 
B6 F64 1.381(16) . ? 
B6 F63 1.393(17) . ? 
B6 F62 1.402(17) . ? 
B7 F71 1.345(17) . ? 
B7 F73 1.357(18) . ? 
B7 F74 1.368(17) . ? 
B7 F72 1.402(17) . ? 
C241 C242 1.3900 . ? 
C241 C246 1.3900 . ? 
C241 H241 0.9500 . ? 
C242 C243 1.3900 . ? 
C242 H242 0.9500 . ? 
C243 C244 1.3900 . ? 
C243 H243 0.9500 . ? 
C244 C245 1.3900 . ? 
C244 H244 0.9500 . ? 
C245 C246 1.3900 . ? 
C245 H245 0.9500 . ? 
C246 H246 0.9500 . ? 
C251 C252 1.3900 . ? 
C251 C256 1.3900 . ? 
C251 H251 0.9500 . ? 
C252 C253 1.3900 . ? 
C252 H252 0.9500 . ? 
C253 C254 1.3900 . ? 
C253 H253 0.9500 . ? 
C254 C255 1.3900 . ? 
C254 H254 0.9500 . ? 
C255 C256 1.3900 . ? 
C255 H255 0.9500 . ? 
C256 H256 0.9500 . ? 
C261 C262 1.3900 . ? 
C261 C266 1.3900 . ? 
C261 H26A 0.9500 . ? 
C262 C263 1.3900 . ? 
C262 H26B 0.9500 . ? 
C263 C264 1.3900 . ? 
C263 H26C 0.9500 . ? 
C264 C265 1.3900 . ? 
C264 H26D 0.9500 . ? 
C265 C266 1.3900 . ? 
C265 H26E 0.9500 . ? 
C266 H26F 0.9500 . ? 
C154 H15C 0.9500 . ? 
O61 C74 1.364(16) . ? 
O61 C71 1.362(14) . ? 
C73 C72 1.373(15) . ? 
C73 H73A 0.9500 . ? 
C71 C70 1.375(16) . ? 
C71 C72 1.376(16) . ? 
O151 C164 1.40(2) . ? 
C72 H72A 0.9500 . ? 
C74 H74A 0.9800 . ? 
C74 H74B 0.9800 . ? 
C74 H74C 0.9800 . ? 
C152 C166 1.53(2) . ? 
C69 C70 1.391(16) . ? 
C69 H69A 0.9500 . ? 
C70 H70A 0.9500 . ? 
C166 H16D 0.9500 . ? 
C164 H16E 0.9800 . ? 
C164 H16F 0.9800 . ? 
C164 H16G 0.9800 . ? 
 
loop_ 
 _geom_angle_atom_site_label_1 
 _geom_angle_atom_site_label_2 
 _geom_angle_atom_site_label_3 
 _geom_angle 
 _geom_angle_site_symmetry_1 
 _geom_angle_site_symmetry_3 
 _geom_angle_publ_flag 
N1 Ag1 N63 135.0(4) . . y 
N1 Ag1 N3 71.7(4) . . y 
N63 Ag1 N3 126.4(4) . . y 
N1 Ag1 N61 122.4(4) . . y 
N63 Ag1 N61 69.8(4) . . y 
N3 Ag1 N61 144.1(4) . . y 
N2 Ag2 N93 129.9(4) . . y 
N2 Ag2 N91 133.0(4) . . y 
N93 Ag2 N91 72.0(4) . . y 
N2 Ag2 N4 72.3(4) . . y 
N93 Ag2 N4 142.2(4) . . y 
N91 Ag2 N4 118.0(4) . . y 
N62 Ag3 N31 131.6(4) . . y 
N62 Ag3 N33 120.1(4) . . y 
N31 Ag3 N33 72.3(4) . . y 
N62 Ag3 N64 71.9(4) . . y 
N31 Ag3 N64 127.4(4) . . y 
N33 Ag3 N64 144.5(4) . . y 
N92 Ag4 N32 124.7(4) . . y 
N92 Ag4 N34 144.3(4) . . y 
N32 Ag4 N34 73.7(4) . . y 
N92 Ag4 N94 71.5(4) . . y 
N32 Ag4 N94 131.8(4) . . y 
N34 Ag4 N94 121.8(4) . . y 
C5 N1 N2 122.1(10) . . ? 
C5 N1 Ag1 115.5(9) . . ? 
N2 N1 Ag1 122.4(8) . . ? 
N1 N2 C2 115.4(11) . . ? 
N1 N2 Ag2 126.9(8) . . ? 
C2 N2 Ag2 117.6(9) . . ? 
C3 C2 N2 122.1(13) . . ? 
C3 C2 C16 123.9(13) . . ? 
N2 C2 C16 113.8(13) . . ? 
C2 C3 C4 121.8(14) . . ? 
C2 C3 H3 119.1 . . ? 
C4 C3 H3 119.1 . . ? 
C5 C4 C3 115.1(15) . . ? 
C5 C4 H4 122.4 . . ? 
C3 C4 H4 122.4 . . ? 
N1 C5 C4 122.9(14) . . ? 
N1 C5 C6 116.7(12) . . ? 
C4 C5 C6 120.3(14) . . ? 
N3 C6 C5 121.8(14) . . ? 
N3 C6 H6 119.1 . . ? 
C5 C6 H6 119.1 . . ? 
C6 N3 C8 121.1(12) . . ? 
C6 N3 Ag1 114.1(10) . . ? 
C8 N3 Ag1 124.7(8) . . ? 
C13 C8 C9 119.3(13) . . ? 
C13 C8 N3 116.6(12) . . ? 
C9 C8 N3 124.1(12) . . ? 
C8 C9 C10 121.5(15) . . ? 
C8 C9 H9 119.3 . . ? 
C10 C9 H9 119.3 . . ? 
C11 C10 C9 118.7(15) . . ? 
C11 C10 H10 120.6 . . ? 
C9 C10 H10 120.6 . . ? 
C10 C11 C12 119.5(14) . . ? 
C10 C11 O1 113.3(14) . . ? 
C12 C11 O1 127.2(14) . . ? 
C11 C12 C13 121.7(15) . . ? 
C11 C12 H12 119.2 . . ? 
C13 C12 H12 119.2 . . ? 
C8 C13 C12 119.3(14) . . ? 
C8 C13 H13 120.4 . . ? 
C12 C13 H13 120.4 . . ? 
C14 O1 C11 114.5(16) . . ? 
O1 C14 H14A 109.5 . . ? 
O1 C14 H14B 109.5 . . ? 
H14A C14 H14B 109.5 . . ? 
O1 C14 H14C 109.5 . . ? 
H14A C14 H14C 109.5 . . ? 
H14B C14 H14C 109.5 . . ? 
N4 C16 C2 121.1(12) . . ? 
N4 C16 H16 119.5 . . ? 
C2 C16 H16 119.5 . . ? 
C16 N4 C18 122.1(11) . . ? 
C16 N4 Ag2 115.0(9) . . ? 
C18 N4 Ag2 122.7(8) . . ? 
C19 C18 C23 119.5(13) . . ? 
C19 C18 N4 123.1(12) . . ? 
C23 C18 N4 117.2(11) . . ? 
C18 C19 C20 119.0(13) . . ? 
C18 C19 H19 120.5 . . ? 
C20 C19 H19 120.5 . . ? 
C21 C20 C19 122.6(13) . . ? 
C21 C20 H20 118.7 . . ? 
C19 C20 H20 118.7 . . ? 
C20 C21 O2 127.5(12) . . ? 
C20 C21 C22 118.0(13) . . ? 
O2 C21 C22 114.5(13) . . ? 
C23 C22 C21 121.0(14) . . ? 
C23 C22 H22 119.5 . . ? 
C21 C22 H22 119.5 . . ? 
C22 C23 C18 119.8(13) . . ? 
C22 C23 H23 120.1 . . ? 
C18 C23 H23 120.1 . . ? 
C21 O2 C24 114.1(11) . . ? 
O2 C24 H24A 109.5 . . ? 
O2 C24 H24B 109.5 . . ? 
H24A C24 H24B 109.5 . . ? 
O2 C24 H24C 109.5 . . ? 
H24A C24 H24C 109.5 . . ? 
H24B C24 H24C 109.5 . . ? 
N32 N31 C35 121.5(12) . . ? 
N32 N31 Ag3 122.9(8) . . ? 
C35 N31 Ag3 114.1(9) . . ? 
N31 N32 C32 118.0(11) . . ? 
N31 N32 Ag4 126.7(9) . . ? 
C32 N32 Ag4 115.0(9) . . ? 
N32 C32 C33 122.0(13) . . ? 
N32 C32 C46 116.7(13) . . ? 
C33 C32 C46 121.2(13) . . ? 
C34 C33 C32 119.3(14) . . ? 
C34 C33 H33 120.4 . . ? 
C32 C33 H33 120.4 . . ? 
C33 C34 C35 116.4(16) . . ? 
C33 C34 H34 121.8 . . ? 
C35 C34 H34 121.8 . . ? 
N31 C35 C34 122.5(15) . . ? 
N31 C35 C36 117.4(13) . . ? 
C34 C35 C36 120.0(14) . . ? 
N33 C36 C35 121.7(13) . . ? 
N33 C36 H36 119.2 . . ? 
C35 C36 H36 119.2 . . ? 
C36 N33 C38 123.3(12) . . ? 
C36 N33 Ag3 113.8(10) . . ? 
C38 N33 Ag3 122.9(9) . . ? 
C39 C38 C43 120.2(12) . . ? 
C39 C38 N33 122.5(11) . . ? 
C43 C38 N33 117.3(11) . . ? 
C38 C39 C40 118.6(11) . . ? 
C38 C39 H39 120.7 . . ? 
C40 C39 H39 120.7 . . ? 
C41 C40 C39 119.8(12) . . ? 
C41 C40 H40 120.1 . . ? 
C39 C40 H40 120.1 . . ? 
C40 C41 O31 123.1(12) . . ? 
C40 C41 C42 120.8(12) . . ? 
O31 C41 C42 116.1(13) . . ? 
C43 C42 C41 120.7(13) . . ? 
C43 C42 H42 119.7 . . ? 
C41 C42 H42 119.7 . . ? 
C42 C43 C38 119.8(12) . . ? 
C42 C43 H43 120.1 . . ? 
C38 C43 H43 120.1 . . ? 
C44 O31 C41 115.6(11) . . ? 
O31 C44 H44A 109.5 . . ? 
O31 C44 H44B 109.5 . . ? 
H44A C44 H44B 109.5 . . ? 
O31 C44 H44C 109.5 . . ? 
H44A C44 H44C 109.5 . . ? 
H44B C44 H44C 109.5 . . ? 
N34 C46 C32 117.9(13) . . ? 
N34 C46 H46 121.1 . . ? 
C32 C46 H46 121.1 . . ? 
C46 N34 C48 119.0(11) . . ? 
C46 N34 Ag4 116.2(10) . . ? 
C48 N34 Ag4 124.6(9) . . ? 
C53 C48 C49 119.1(14) . . ? 
C53 C48 N34 117.1(13) . . ? 
C49 C48 N34 123.7(13) . . ? 
C48 C49 C50 120.8(14) . . ? 
C48 C49 H49 119.6 . . ? 
C50 C49 H49 119.6 . . ? 
C51 C50 C49 119.2(15) . . ? 
C51 C50 H50 120.4 . . ? 
C49 C50 H50 120.4 . . ? 
C50 C51 C52 122.3(15) . . ? 
C50 C51 O32 110.9(14) . . ? 
C52 C51 O32 126.8(14) . . ? 
C51 C52 C53 116.4(16) . . ? 
C51 C52 H52 121.8 . . ? 
C53 C52 H52 121.8 . . ? 
C48 C53 C52 122.1(16) . . ? 
C48 C53 H53 118.9 . . ? 
C52 C53 H53 118.9 . . ? 
C54 O32 C51 115.3(15) . . ? 
O32 C54 H54A 109.5 . . ? 
O32 C54 H54B 109.5 . . ? 
H54A C54 H54B 109.5 . . ? 
O32 C54 H54C 109.5 . . ? 
H54A C54 H54C 109.5 . . ? 
H54B C54 H54C 109.5 . . ? 
C65 N61 N62 122.6(11) . . ? 
C65 N61 Ag1 116.6(9) . . ? 
N62 N61 Ag1 120.8(8) . . ? 
C62 N62 N61 119.2(11) . . ? 
C62 N62 Ag3 114.1(9) . . ? 
N61 N62 Ag3 126.7(8) . . ? 
N62 C62 C63 118.4(14) . . ? 
N62 C62 C76 117.7(13) . . ? 
C63 C62 C76 123.9(14) . . ? 
C64 C63 C62 119.4(14) . . ? 
C64 C63 H63 120.3 . . ? 
C62 C63 H63 120.3 . . ? 
C65 C64 C63 119.3(16) . . ? 
C65 C64 H64 120.3 . . ? 
C63 C64 H64 120.3 . . ? 
C64 C65 N61 121.0(14) . . ? 
C64 C65 C66 124.6(14) . . ? 
N61 C65 C66 114.3(11) . . ? 
N63 C66 C65 122.0(11) . . ? 
N63 C66 H66 119.0 . . ? 
C65 C66 H66 119.0 . . ? 
C66 N63 C68 122.7(10) . . ? 
C66 N63 Ag1 117.3(9) . . ? 
C68 N63 Ag1 120.0(8) . . ? 
C73 C68 C69 117.4(14) . . ? 
C73 C68 N63 119.6(11) . . ? 
C69 C68 N63 123.0(13) . . ? 
N64 C76 C62 121.6(14) . . ? 
N64 C76 H76 119.2 . . ? 
C62 C76 H76 119.2 . . ? 
C76 N64 C78 123.9(12) . . ? 
C76 N64 Ag3 114.7(10) . . ? 
C78 N64 Ag3 121.4(9) . . ? 
C83 C78 C79 121.3(14) . . ? 
C83 C78 N64 122.3(14) . . ? 
C79 C78 N64 116.4(12) . . ? 
C78 C79 C80 119.3(15) . . ? 
C78 C79 H79 120.3 . . ? 
C80 C79 H79 120.3 . . ? 
C81 C80 C79 119.9(16) . . ? 
C81 C80 H80 120.0 . . ? 
C79 C80 H80 120.0 . . ? 
C80 C81 O62 116.4(15) . . ? 
C80 C81 C82 119.7(14) . . ? 
O62 C81 C82 123.9(15) . . ? 
C81 C82 C83 121.2(16) . . ? 
C81 C82 H82 119.4 . . ? 
C83 C82 H82 119.4 . . ? 
C78 C83 C82 118.6(16) . . ? 
C78 C83 H83 120.7 . . ? 
C82 C83 H83 120.7 . . ? 
C81 O62 C84 113.8(16) . . ? 
O62 C84 H84A 109.5 . . ? 
O62 C84 H84B 109.5 . . ? 
H84A C84 H84B 109.5 . . ? 
O62 C84 H84C 109.5 . . ? 
H84A C84 H84C 109.5 . . ? 
H84B C84 H84C 109.5 . . ? 
C95 N91 N92 119.0(11) . . ? 
C95 N91 Ag2 117.2(9) . . ? 
N92 N91 Ag2 123.7(7) . . ? 
N91 N92 C92 119.7(11) . . ? 
N91 N92 Ag4 123.5(8) . . ? 
C92 N92 Ag4 116.8(10) . . ? 
C93 C92 N92 123.2(16) . . ? 
C93 C92 C106 120.8(15) . . ? 
N92 C92 C106 115.9(13) . . ? 
C92 C93 C94 117.3(15) . . ? 
C92 C93 H93 121.4 . . ? 
C94 C93 H93 121.4 . . ? 
C95 C94 C93 115.2(15) . . ? 
C95 C94 H94 122.4 . . ? 
C93 C94 H94 122.4 . . ? 
N91 C95 C94 125.6(14) . . ? 
N91 C95 C96 115.0(12) . . ? 
C94 C95 C96 119.4(14) . . ? 
N93 C96 C95 121.1(12) . . ? 
N93 C96 H96 119.5 . . ? 
C95 C96 H96 119.5 . . ? 
C96 N93 C98 121.0(11) . . ? 
C96 N93 Ag2 114.7(10) . . ? 
C98 N93 Ag2 124.3(8) . . ? 
C99 C98 C103 116.9(15) . . ? 
C99 C98 N93 125.3(13) . . ? 
C103 C98 N93 117.7(12) . . ? 
C100 C99 C98 118.6(16) . . ? 
C100 C99 H99 120.7 . . ? 
C98 C99 H99 120.7 . . ? 
C99 C100 C101 123.9(16) . . ? 
C99 C100 H100 118.1 . . ? 
C101 C100 H100 118.1 . . ? 
C100 C101 C102 119.4(15) . . ? 
C100 C101 O91 117.9(15) . . ? 
C102 C101 O91 122.7(14) . . ? 
C101 C102 C103 117.6(16) . . ? 
C101 C102 H102 121.2 . . ? 
C103 C102 H102 121.2 . . ? 
C102 C103 C98 123.6(15) . . ? 
C102 C103 H103 118.2 . . ? 
C98 C103 H103 118.2 . . ? 
C101 O91 C104 113.2(13) . . ? 
O91 C104 H90A 109.5 . . ? 
O91 C104 H90B 109.5 . . ? 
H90A C104 H90B 109.5 . . ? 
O91 C104 H90C 109.5 . . ? 
H90A C104 H90C 109.5 . . ? 
H90B C104 H90C 109.5 . . ? 
N94 C106 C92 119.5(12) . . ? 
N94 C106 H106 120.2 . . ? 
C92 C106 H106 120.2 . . ? 
C106 N94 C108 121.8(11) . . ? 
C106 N94 Ag4 116.2(9) . . ? 
C108 N94 Ag4 121.9(9) . . ? 
C113 C108 C109 117.0(16) . . ? 
C113 C108 N94 128.4(15) . . ? 
C109 C108 N94 114.4(12) . . ? 
C110 C109 C108 118.4(17) . . ? 
C110 C109 H109 120.8 . . ? 
C108 C109 H109 120.8 . . ? 
C111 C110 C109 124(2) . . ? 
C111 C110 H110 117.9 . . ? 
C109 C110 H110 117.9 . . ? 
C110 C111 C112 116.2(18) . . ? 
C110 C111 O92 125.0(18) . . ? 
C112 C111 O92 118.8(19) . . ? 
C113 C112 C111 121.9(17) . . ? 
C113 C112 H112 119.1 . . ? 
C111 C112 H112 119.1 . . ? 
C112 C113 C108 122.3(17) . . ? 
C112 C113 H113 118.9 . . ? 
C108 C113 H113 118.9 . . ? 
C114 O92 C111 115.6(17) . . ? 
O92 C114 H91A 109.5 . . ? 
O92 C114 H91B 109.5 . . ? 
H91A C114 H91B 109.5 . . ? 
O92 C114 H91C 109.5 . . ? 
H91A C114 H91C 109.5 . . ? 
H91B C114 H91C 109.5 . . ? 
N123 Ag5 N181 131.0(4) . . y 
N123 Ag5 N183 139.6(4) . . y 
N181 Ag5 N183 72.9(5) . . y 
N123 Ag5 N121 71.3(4) . . y 
N181 Ag5 N121 138.9(4) . . y 
N183 Ag5 N121 114.2(4) . . y 
N122 Ag6 N211 120.7(5) . . y 
N122 Ag6 N213 145.1(5) . . y 
N211 Ag6 N213 73.2(5) . . y 
N122 Ag6 N124 72.0(4) . . y 
N211 Ag6 N124 140.7(5) . . y 
N213 Ag6 N124 119.4(4) . . y 
N153 Ag7 N151 72.3(5) . . y 
N153 Ag7 N184 124.4(5) . . y 
N151 Ag7 N184 143.0(5) . . y 
N153 Ag7 N182 144.3(5) . . y 
N151 Ag7 N182 113.0(4) . . y 
N184 Ag7 N182 73.9(5) . . y 
N154 Ag8 N214 141.7(5) . . y 
N154 Ag8 N212 124.5(4) . . y 
N214 Ag8 N212 73.1(5) . . y 
N154 Ag8 N152 71.8(4) . . y 
N214 Ag8 N152 118.2(4) . . y 
N212 Ag8 N152 140.9(5) . . y 
N122 N121 C125 123.6(12) . . ? 
N122 N121 Ag5 123.4(8) . . ? 
C125 N121 Ag5 113.0(10) . . ? 
C122 N122 N121 119.4(12) . . ? 
C122 N122 Ag6 116.6(10) . . ? 
N121 N122 Ag6 124.0(9) . . ? 
N122 C122 C123 120.7(14) . . ? 
N122 C122 C136 118.9(13) . . ? 
C123 C122 C136 120.4(14) . . ? 
C124 C123 C122 119.1(14) . . ? 
C124 C123 H123 120.4 . . ? 
C122 C123 H123 120.4 . . ? 
C123 C124 C125 119.1(15) . . ? 
C123 C124 H124 120.5 . . ? 
C125 C124 H124 120.5 . . ? 
N121 C125 C126 118.1(14) . . ? 
N121 C125 C124 118.0(15) . . ? 
C126 C125 C124 123.5(15) . . ? 
N123 C126 C125 123.1(15) . . ? 
N123 C126 H126 118.4 . . ? 
C125 C126 H126 118.4 . . ? 
C126 N123 C128 123.2(13) . . ? 
C126 N123 Ag5 114.2(10) . . ? 
C128 N123 Ag5 122.0(9) . . ? 
C133 C128 C129 118.2(14) . . ? 
C133 C128 N123 117.7(12) . . ? 
C129 C128 N123 124.1(11) . . ? 
C130 C129 C128 117.6(13) . . ? 
C130 C129 H129 121.2 . . ? 
C128 C129 H129 121.2 . . ? 
C131 C130 C129 123.9(15) . . ? 
C131 C130 H130 118.1 . . ? 
C129 C130 H130 118.1 . . ? 
C130 C131 O121 115.3(15) . . ? 
C130 C131 C132 117.1(15) . . ? 
O121 C131 C132 127.6(13) . . ? 
C133 C132 C131 118.9(15) . . ? 
C133 C132 H132 120.6 . . ? 
C131 C132 H132 120.6 . . ? 
C128 C133 C132 124.4(15) . . ? 
C128 C133 H133 117.8 . . ? 
C132 C133 H133 117.8 . . ? 
C131 O121 C134 113.9(14) . . ? 
O121 C134 H13A 109.5 . . ? 
O121 C134 H13B 109.5 . . ? 
H13A C134 H13B 109.5 . . ? 
O121 C134 H13C 109.5 . . ? 
H13A C134 H13C 109.5 . . ? 
H13B C134 H13C 109.5 . . ? 
N124 C136 C122 118.7(13) . . ? 
N124 C136 H136 120.7 . . ? 
C122 C136 H136 120.7 . . ? 
C136 N124 C138 124.2(12) . . ? 
C136 N124 Ag6 113.8(9) . . ? 
C138 N124 Ag6 121.4(9) . . ? 
C143 C138 C139 121.8(15) . . ? 
C143 C138 N124 114.5(12) . . ? 
C139 C138 N124 123.7(12) . . ? 
C138 C139 C140 121.1(14) . . ? 
C138 C139 H139 119.5 . . ? 
C140 C139 H139 119.4 . . ? 
C141 C140 C139 116.0(15) . . ? 
C141 C140 H140 122.0 . . ? 
C139 C140 H140 122.0 . . ? 
C140 C141 C142 125.1(16) . . ? 
C140 C141 O122 123.8(14) . . ? 
C142 C141 O122 111.1(15) . . ? 
C141 C142 C143 116.7(18) . . ? 
C141 C142 H142 121.6 . . ? 
C143 C142 H142 121.6 . . ? 
C138 C143 C142 119.3(18) . . ? 
C138 C143 H143 120.3 . . ? 
C142 C143 H143 120.3 . . ? 
C144 O122 C141 114.5(16) . . ? 
O122 C144 H14D 109.5 . . ? 
O122 C144 H14E 109.5 . . ? 
H14D C144 H14E 109.5 . . ? 
O122 C144 H14F 109.5 . . ? 
H14D C144 H14F 109.5 . . ? 
H14E C144 H14F 109.5 . . ? 
C155 N151 N152 123.3(13) . . ? 
C155 N151 Ag7 115.1(10) . . ? 
N152 N151 Ag7 121.6(9) . . ? 
N151 N152 C152 116.4(13) . . ? 
N151 N152 Ag8 127.8(9) . . ? 
C152 N152 Ag8 115.8(11) . . ? 
C152 C153 C154 118.6(15) . . ? 
C152 C153 H15A 120.7 . . ? 
C154 C153 H15A 120.7 . . ? 
N151 C155 C154 120.3(15) . . ? 
N151 C155 C156 115.9(14) . . ? 
C154 C155 C156 123.7(15) . . ? 
N153 C156 C155 122.5(17) . . ? 
N153 C156 H156 118.7 . . ? 
C155 C156 H156 118.7 . . ? 
C156 N153 C158 121.6(15) . . ? 
C156 N153 Ag7 114.0(12) . . ? 
C158 N153 Ag7 124.4(11) . . ? 
N153 C158 C159 127.0(13) . . ? 
N153 C158 C163 116.2(16) . . ? 
C159 C158 C163 116.7(16) . . ? 
C158 C159 C160 118.9(17) . . ? 
C158 C159 H15B 120.6 . . ? 
C160 C159 H15B 120.6 . . ? 
C161 C160 C159 120(2) . . ? 
C161 C160 H16A 119.9 . . ? 
C159 C160 H16A 119.9 . . ? 
C162 C161 C160 123(2) . . ? 
C162 C161 O151 112(2) . . ? 
C160 C161 O151 125(2) . . ? 
C161 C162 C163 115(2) . . ? 
C161 C162 H16B 122.7 . . ? 
C163 C162 H16B 122.7 . . ? 
C162 C163 C158 127(2) . . ? 
C162 C163 H16C 116.7 . . ? 
C158 C163 H16C 116.7 . . ? 
C166 N154 C168 121.6(12) . . ? 
C166 N154 Ag8 115.8(10) . . ? 
C168 N154 Ag8 122.5(9) . . ? 
N154 C168 C169 125.3(13) . . ? 
N154 C168 C173 120.5(11) . . ? 
C169 C168 C173 114.1(14) . . ? 
C170 C169 C168 122.2(14) . . ? 
C170 C169 H169 118.9 . . ? 
C168 C169 H169 118.9 . . ? 
C171 C170 C169 118.4(15) . . ? 
C171 C170 H170 120.8 . . ? 
C169 C170 H170 120.8 . . ? 
C170 C171 O152 113.6(14) . . ? 
C170 C171 C172 125.9(14) . . ? 
O152 C171 C172 120.5(13) . . ? 
C173 C172 C171 111.1(14) . . ? 
C173 C172 H172 124.4 . . ? 
C171 C172 H172 124.4 . . ? 
C172 C173 C168 128.3(15) . . ? 
C172 C173 H173 115.9 . . ? 
C168 C173 H173 115.9 . . ? 
C174 O152 C171 117.8(13) . . ? 
O152 C174 H17A 109.5 . . ? 
O152 C174 H17B 109.5 . . ? 
H17A C174 H17B 109.5 . . ? 
O152 C174 H17C 109.5 . . ? 
H17A C174 H17C 109.5 . . ? 
H17B C174 H17C 109.5 . . ? 
N182 N181 C185 119.2(14) . . ? 
N182 N181 Ag5 128.0(11) . . ? 
C185 N181 Ag5 112.4(10) . . ? 
N181 N182 C182 124.8(15) . . ? 
N181 N182 Ag7 126.3(11) . . ? 
C182 N182 Ag7 108.7(11) . . ? 
C183 C182 N182 116.6(17) . . ? 
C183 C182 C196 124.1(17) . . ? 
N182 C182 C196 119.0(17) . . ? 
C182 C183 C184 121.7(18) . . ? 
C182 C183 H183 119.1 . . ? 
C184 C183 H183 119.1 . . ? 
C183 C184 C185 116.1(18) . . ? 
C183 C184 H184 122.0 . . ? 
C185 C184 H184 122.0 . . ? 
N181 C185 C184 120.9(15) . . ? 
N181 C185 C186 119.8(15) . . ? 
C184 C185 C186 119.3(17) . . ? 
N183 C186 C185 121.7(16) . . ? 
N183 C186 H186 119.2 . . ? 
C185 C186 H186 119.2 . . ? 
C186 N183 C188 124.2(14) . . ? 
C186 N183 Ag5 112.9(11) . . ? 
C188 N183 Ag5 122.8(9) . . ? 
N183 C188 C193 118.3(13) . . ? 
N183 C188 C189 123.8(12) . . ? 
C193 C188 C189 117.9(13) . . ? 
C190 C189 C188 120.9(13) . . ? 
C190 C189 H189 119.5 . . ? 
C188 C189 H189 119.5 . . ? 
C189 C190 C191 121.1(13) . . ? 
C189 C190 H190 119.5 . . ? 
C191 C190 H190 119.5 . . ? 
O181 C191 C190 125.5(12) . . ? 
O181 C191 C192 117.7(11) . . ? 
C190 C191 C192 116.9(12) . . ? 
C193 C192 C191 122.2(13) . . ? 
C193 C192 H192 118.9 . . ? 
C191 C192 H192 118.9 . . ? 
C192 C193 C188 121.1(14) . . ? 
C192 C193 H193 119.5 . . ? 
C188 C193 H193 119.5 . . ? 
C191 O181 C194 116.9(10) . . ? 
O181 C194 H19A 109.5 . . ? 
O181 C194 H19B 109.5 . . ? 
H19A C194 H19B 109.5 . . ? 
O181 C194 H19C 109.5 . . ? 
H19A C194 H19C 109.5 . . ? 
H19B C194 H19C 109.5 . . ? 
N184 C196 C182 126.8(17) . . ? 
N184 C196 H196 116.6 . . ? 
C182 C196 H196 116.6 . . ? 
C196 N184 C198 124.8(15) . . ? 
C196 N184 Ag7 110.9(12) . . ? 
C198 N184 Ag7 124.0(11) . . ? 
C203 C198 N184 115.4(15) . . ? 
C203 C198 C199 118.6(17) . . ? 
N184 C198 C199 126.0(16) . . ? 
C198 C199 C200 122.1(17) . . ? 
C198 C199 H199 118.9 . . ? 
C200 C199 H199 118.9 . . ? 
C201 C200 C199 120.3(17) . . ? 
C201 C200 H200 119.8 . . ? 
C199 C200 H200 119.8 . . ? 
O182 C201 C200 127.7(15) . . ? 
O182 C201 C202 115.6(17) . . ? 
C200 C201 C202 116.8(17) . . ? 
C203 C202 C201 123(2) . . ? 
C203 C202 H202 118.5 . . ? 
C201 C202 H202 118.5 . . ? 
C198 C203 C202 119(2) . . ? 
C198 C203 H203 120.4 . . ? 
C202 C203 H203 120.4 . . ? 
C201 O182 C204 116.7(14) . . ? 
O182 C204 H20A 109.5 . . ? 
O182 C204 H20B 109.5 . . ? 
H20A C204 H20B 109.5 . . ? 
O182 C204 H20C 109.5 . . ? 
H20A C204 H20C 109.5 . . ? 
H20B C204 H20C 109.5 . . ? 
N212 N211 C215 120.6(15) . . ? 
N212 N211 Ag6 126.4(11) . . ? 
C215 N211 Ag6 112.5(12) . . ? 
N211 N212 C212 124.5(15) . . ? 
N211 N212 Ag8 126.5(10) . . ? 
C212 N212 Ag8 108.9(12) . . ? 
N212 C212 C226 124.0(16) . . ? 
N212 C212 C213 117.2(17) . . ? 
C226 C212 C213 118.7(15) . . ? 
C214 C213 C212 119.8(16) . . ? 
C214 C213 H213 120.1 . . ? 
C212 C213 H213 120.1 . . ? 
C215 C214 C213 114.7(18) . . ? 
C215 C214 H214 122.7 . . ? 
C213 C214 H214 122.7 . . ? 
N211 C215 C216 118.3(16) . . ? 
N211 C215 C214 123.2(19) . . ? 
C216 C215 C214 118.5(18) . . ? 
N213 C216 C215 122.9(16) . . ? 
N213 C216 H216 118.5 . . ? 
C215 C216 H216 118.5 . . ? 
C216 N213 C218 126.0(14) . . ? 
C216 N213 Ag6 111.5(12) . . ? 
C218 N213 Ag6 122.1(9) . . ? 
C223 C218 C219 117.7(16) . . ? 
C223 C218 N213 117.4(14) . . ? 
C219 C218 N213 124.8(13) . . ? 
C220 C219 C218 123.3(16) . . ? 
C220 C219 H219 118.3 . . ? 
C218 C219 H219 118.3 . . ? 
C219 C220 C221 115.8(15) . . ? 
C219 C220 H220 122.1 . . ? 
C221 C220 H220 122.1 . . ? 
O211 C221 C220 122.2(13) . . ? 
O211 C221 C222 115.8(14) . . ? 
C220 C221 C222 122.0(15) . . ? 
C221 O211 C224 116.2(12) . . ? 
C223 C222 C221 119.5(16) . . ? 
C223 C222 H222 120.3 . . ? 
C221 C222 H222 120.3 . . ? 
C218 C223 C222 121.7(16) . . ? 
C218 C223 H223 119.1 . . ? 
C222 C223 H223 119.1 . . ? 
C231 O212 C234 116.8(12) . . ? 
O211 C224 H22A 109.5 . . ? 
O211 C224 H22B 109.5 . . ? 
H22A C224 H22B 109.5 . . ? 
O211 C224 H22C 109.5 . . ? 
H22A C224 H22C 109.5 . . ? 
H22B C224 H22C 109.5 . . ? 
N214 C226 C212 119.9(15) . . ? 
N214 C226 H226 120.0 . . ? 
C212 C226 H226 120.0 . . ? 
C226 N214 C228 120.3(14) . . ? 
C226 N214 Ag8 114.0(12) . . ? 
C228 N214 Ag8 125.7(11) . . ? 
N214 C228 C233 117.8(13) . . ? 
N214 C228 C229 127.3(16) . . ? 
C233 C228 C229 114.9(15) . . ? 
C230 C229 C228 122.0(16) . . ? 
C230 C229 H229 119.0 . . ? 
C228 C229 H229 119.0 . . ? 
C229 C230 C231 121.7(16) . . ? 
C229 C230 H230 119.1 . . ? 
C231 C230 H230 119.1 . . ? 
C230 C231 O212 126.1(13) . . ? 
C230 C231 C232 118.2(15) . . ? 
O212 C231 C232 115.6(14) . . ? 
C233 C232 C231 118.9(15) . . ? 
C233 C232 H232 120.6 . . ? 
C231 C232 H232 120.6 . . ? 
C232 C233 C228 124.3(14) . . ? 
C232 C233 H233 117.9 . . ? 
C228 C233 H233 117.9 . . ? 
O212 C234 H23A 109.5 . . ? 
O212 C234 H23B 109.5 . . ? 
H23A C234 H23B 109.5 . . ? 
O212 C234 H23C 109.5 . . ? 
H23A C234 H23C 109.5 . . ? 
H23B C234 H23C 109.5 . . ? 
F13 B1 F11 109.6(12) . . ? 
F13 B1 F12 110.7(13) . . ? 
F11 B1 F12 109.6(12) . . ? 
F13 B1 F14 111.1(13) . . ? 
F11 B1 F14 107.2(13) . . ? 
F12 B1 F14 108.5(12) . . ? 
F24 B2 F23 111.2(12) . . ? 
F24 B2 F22 109.3(12) . . ? 
F23 B2 F22 108.2(11) . . ? 
F24 B2 F21 109.4(11) . . ? 
F23 B2 F21 110.0(12) . . ? 
F22 B2 F21 108.7(11) . . ? 
F33 B3 F34 111.0(14) . . ? 
F33 B3 F31 107.2(12) . . ? 
F34 B3 F31 108.6(12) . . ? 
F33 B3 F32 109.1(12) . . ? 
F34 B3 F32 108.5(13) . . ? 
F31 B3 F32 112.4(12) . . ? 
F43 B4 F42 109.6(13) . . ? 
F43 B4 F41 110.3(11) . . ? 
F42 B4 F41 111.3(12) . . ? 
F43 B4 F44 109.4(12) . . ? 
F42 B4 F44 109.3(12) . . ? 
F41 B4 F44 106.9(12) . . ? 
F52 B5 F51 112.4(12) . . ? 
F52 B5 F54 111.7(13) . . ? 
F51 B5 F54 112.9(13) . . ? 
F52 B5 F53 107.7(12) . . ? 
F51 B5 F53 105.1(12) . . ? 
F54 B5 F53 106.4(12) . . ? 
F61 B6 F64 112.0(14) . . ? 
F61 B6 F63 108.2(14) . . ? 
F64 B6 F63 107.1(14) . . ? 
F61 B6 F62 112.1(14) . . ? 
F64 B6 F62 110.3(14) . . ? 
F63 B6 F62 106.9(14) . . ? 
F71 B7 F73 105.1(16) . . ? 
F71 B7 F74 115.0(17) . . ? 
F73 B7 F74 105.7(16) . . ? 
F71 B7 F72 106.6(15) . . ? 
F73 B7 F72 116.3(17) . . ? 
F74 B7 F72 108.4(16) . . ? 
C242 C241 C246 120.0 . . ? 
C242 C241 H241 120.0 . . ? 
C246 C241 H241 120.0 . . ? 
C243 C242 C241 120.0 . . ? 
C243 C242 H242 120.0 . . ? 
C241 C242 H242 120.0 . . ? 
C244 C243 C242 120.0 . . ? 
C244 C243 H243 120.0 . . ? 
C242 C243 H243 120.0 . . ? 
C243 C244 C245 120.0 . . ? 
C243 C244 H244 120.0 . . ? 
C245 C244 H244 120.0 . . ? 
C246 C245 C244 120.0 . . ? 
C246 C245 H245 120.0 . . ? 
C244 C245 H245 120.0 . . ? 
C245 C246 C241 120.0 . . ? 
C245 C246 H246 120.0 . . ? 
C241 C246 H246 120.0 . . ? 
C252 C251 C256 120.0 . . ? 
C252 C251 H251 120.0 . . ? 
C256 C251 H251 120.0 . . ? 
C251 C252 C253 120.0 . . ? 
C251 C252 H252 120.0 . . ? 
C253 C252 H252 120.0 . . ? 
C254 C253 C252 120.0 . . ? 
C254 C253 H253 120.0 . . ? 
C252 C253 H253 120.0 . . ? 
C255 C254 C253 120.0 . . ? 
C255 C254 H254 120.0 . . ? 
C253 C254 H254 120.0 . . ? 
C254 C255 C256 120.0 . . ? 
C254 C255 H255 120.0 . . ? 
C256 C255 H255 120.0 . . ? 
C255 C256 C251 120.0 . . ? 
C255 C256 H256 120.0 . . ? 
C251 C256 H256 120.0 . . ? 
C262 C261 C266 120.0 . . ? 
C262 C261 H26A 120.0 . . ? 
C266 C261 H26A 120.0 . . ? 
C263 C262 C261 120.0 . . ? 
C263 C262 H26B 120.0 . . ? 
C261 C262 H26B 120.0 . . ? 
C262 C263 C264 120.0 . . ? 
C262 C263 H26C 120.0 . . ? 
C264 C263 H26C 120.0 . . ? 
C263 C264 C265 120.0 . . ? 
C263 C264 H26D 120.0 . . ? 
C265 C264 H26D 120.0 . . ? 
C266 C265 C264 120.0 . . ? 
C266 C265 H26E 120.0 . . ? 
C264 C265 H26E 120.0 . . ? 
C265 C266 C261 120.0 . . ? 
C265 C266 H26F 120.0 . . ? 
C261 C266 H26F 120.0 . . ? 
C153 C154 C155 118.0(15) . . ? 
C153 C154 H15C 121.0 . . ? 
C155 C154 H15C 121.0 . . ? 
C74 O61 C71 119.6(15) . . ? 
C68 C73 C72 123.8(14) . . ? 
C68 C73 H73A 118.1 . . ? 
C72 C73 H73A 118.1 . . ? 
O61 C71 C70 120.3(17) . . ? 
O61 C71 C72 120.7(15) . . ? 
C70 C71 C72 119.0(16) . . ? 
C164 O151 C161 106.3(19) . . ? 
C73 C72 C71 118.5(16) . . ? 
C73 C72 H72A 120.8 . . ? 
C71 C72 H72A 120.8 . . ? 
O61 C74 H74A 109.5 . . ? 
O61 C74 H74B 109.5 . . ? 
H74A C74 H74B 109.5 . . ? 
O61 C74 H74C 109.5 . . ? 
H74A C74 H74C 109.5 . . ? 
H74B C74 H74C 109.5 . . ? 
N152 C152 C153 123.2(16) . . ? 
N152 C152 C166 114.2(14) . . ? 
C153 C152 C166 122.5(15) . . ? 
C68 C69 C70 120.2(17) . . ? 
C68 C69 H69A 119.9 . . ? 
C70 C69 H69A 119.9 . . ? 
C71 C70 C69 121.1(17) . . ? 
C71 C70 H70A 119.4 . . ? 
C69 C70 H70A 119.4 . . ? 
N154 C166 C152 122.4(14) . . ? 
N154 C166 H16D 118.8 . . ? 
C152 C166 H16D 118.8 . . ? 
O151 C164 H16E 109.5 . . ? 
O151 C164 H16F 109.5 . . ? 
H16E C164 H16F 109.5 . . ? 
O151 C164 H16G 109.5 . . ? 
H16E C164 H16G 109.5 . . ? 
H16F C164 H16G 109.5 . . ? 
 
loop_ 
 _geom_torsion_atom_site_label_1 
 _geom_torsion_atom_site_label_2 
 _geom_torsion_atom_site_label_3 
 _geom_torsion_atom_site_label_4 
 _geom_torsion 
 _geom_torsion_site_symmetry_1 
 _geom_torsion_site_symmetry_2 
 _geom_torsion_site_symmetry_3 
 _geom_torsion_site_symmetry_4 
 _geom_torsion_publ_flag 
N63 Ag1 N1 C5 -121.2(10) . . . . ? 
N3 Ag1 N1 C5 2.4(9) . . . . ? 
N61 Ag1 N1 C5 145.6(9) . . . . ? 
N63 Ag1 N1 N2 55.7(10) . . . . ? 
N3 Ag1 N1 N2 179.3(10) . . . . ? 
N61 Ag1 N1 N2 -37.5(10) . . . . ? 
C5 N1 N2 C2 -7.1(17) . . . . ? 
Ag1 N1 N2 C2 176.2(9) . . . . ? 
C5 N1 N2 Ag2 172.2(9) . . . . ? 
Ag1 N1 N2 Ag2 -4.5(13) . . . . ? 
N93 Ag2 N2 N1 -34.6(12) . . . . ? 
N91 Ag2 N2 N1 68.7(11) . . . . ? 
N4 Ag2 N2 N1 -179.2(10) . . . . ? 
N93 Ag2 N2 C2 144.7(9) . . . . ? 
N91 Ag2 N2 C2 -112.0(10) . . . . ? 
N4 Ag2 N2 C2 0.1(9) . . . . ? 
N1 N2 C2 C3 6.2(19) . . . . ? 
Ag2 N2 C2 C3 -173.2(12) . . . . ? 
N1 N2 C2 C16 -178.6(11) . . . . ? 
Ag2 N2 C2 C16 2.1(15) . . . . ? 
N2 C2 C3 C4 -4(2) . . . . ? 
C16 C2 C3 C4 -178.9(15) . . . . ? 
C2 C3 C4 C5 2(2) . . . . ? 
N2 N1 C5 C4 6(2) . . . . ? 
Ag1 N1 C5 C4 -177.0(12) . . . . ? 
N2 N1 C5 C6 -177.5(12) . . . . ? 
Ag1 N1 C5 C6 -0.6(17) . . . . ? 
C3 C4 C5 N1 -3(2) . . . . ? 
C3 C4 C5 C6 -179.7(15) . . . . ? 
N1 C5 C6 N3 -4(2) . . . . ? 
C4 C5 C6 N3 172.9(15) . . . . ? 
C5 C6 N3 C8 -178.1(12) . . . . ? 
C5 C6 N3 Ag1 5.7(18) . . . . ? 
N1 Ag1 N3 C6 -4.2(10) . . . . ? 
N63 Ag1 N3 C6 128.8(10) . . . . ? 
N61 Ag1 N3 C6 -124.5(11) . . . . ? 
N1 Ag1 N3 C8 179.8(9) . . . . ? 
N63 Ag1 N3 C8 -47.2(9) . . . . ? 
N61 Ag1 N3 C8 59.6(10) . . . . ? 
C6 N3 C8 C13 -177.9(11) . . . . ? 
Ag1 N3 C8 C13 -2.2(9) . . . . ? 
C6 N3 C8 C9 2.1(15) . . . . ? 
Ag1 N3 C8 C9 177.8(5) . . . . ? 
C13 C8 C9 C10 -0.01(15) . . . . ? 
N3 C8 C9 C10 -180.0(7) . . . . ? 
C8 C9 C10 C11 -0.03(15) . . . . ? 
C9 C10 C11 C12 0.1(3) . . . . ? 
C9 C10 C11 O1 179.96(19) . . . . ? 
C10 C11 C12 C13 0.0(5) . . . . ? 
O1 C11 C12 C13 -179.9(3) . . . . ? 
C9 C8 C13 C12 0.0(3) . . . . ? 
N3 C8 C13 C12 180.0(7) . . . . ? 
C11 C12 C13 C8 0.0(5) . . . . ? 
C10 C11 O1 C14 -178.2(17) . . . . ? 
C12 C11 O1 C14 1.7(18) . . . . ? 
C3 C2 C16 N4 170.5(14) . . . . ? 
N2 C2 C16 N4 -4.7(19) . . . . ? 
C2 C16 N4 C18 -180.0(11) . . . . ? 
C2 C16 N4 Ag2 4.8(16) . . . . ? 
N2 Ag2 N4 C16 -2.5(9) . . . . ? 
N93 Ag2 N4 C16 -136.1(10) . . . . ? 
N91 Ag2 N4 C16 127.3(9) . . . . ? 
N2 Ag2 N4 C18 -177.8(9) . . . . ? 
N93 Ag2 N4 C18 48.7(11) . . . . ? 
N91 Ag2 N4 C18 -47.9(9) . . . . ? 
C16 N4 C18 C19 7.0(14) . . . . ? 
Ag2 N4 C18 C19 -178.1(5) . . . . ? 
C16 N4 C18 C23 -178.4(10) . . . . ? 
Ag2 N4 C18 C23 -3.5(9) . . . . ? 
C23 C18 C19 C20 0.00(14) . . . . ? 
N4 C18 C19 C20 174.4(7) . . . . ? 
C18 C19 C20 C21 0.02(15) . . . . ? 
C19 C20 C21 O2 -179.9(2) . . . . ? 
C19 C20 C21 C22 0.0(3) . . . . ? 
C20 C21 C22 C23 0.0(4) . . . . ? 
O2 C21 C22 C23 179.9(3) . . . . ? 
C21 C22 C23 C18 0.1(4) . . . . ? 
C19 C18 C23 C22 0.0(3) . . . . ? 
N4 C18 C23 C22 -174.8(7) . . . . ? 
C20 C21 O2 C24 8.1(12) . . . . ? 
C22 C21 O2 C24 -171.9(11) . . . . ? 
N62 Ag3 N31 N32 72.9(11) . . . . ? 
N33 Ag3 N31 N32 -172.2(11) . . . . ? 
N64 Ag3 N31 N32 -26.0(12) . . . . ? 
N62 Ag3 N31 C35 -120.6(10) . . . . ? 
N33 Ag3 N31 C35 -5.7(9) . . . . ? 
N64 Ag3 N31 C35 140.5(9) . . . . ? 
C35 N31 N32 C32 4.5(19) . . . . ? 
Ag3 N31 N32 C32 170.0(9) . . . . ? 
C35 N31 N32 Ag4 177.8(10) . . . . ? 
Ag3 N31 N32 Ag4 -16.7(14) . . . . ? 
N92 Ag4 N32 N31 -25.4(12) . . . . ? 
N34 Ag4 N32 N31 -171.1(11) . . . . ? 
N94 Ag4 N32 N31 70.4(12) . . . . ? 
N92 Ag4 N32 C32 148.1(9) . . . . ? 
N34 Ag4 N32 C32 2.3(9) . . . . ? 
N94 Ag4 N32 C32 -116.1(9) . . . . ? 
N31 N32 C32 C33 -2(2) . . . . ? 
Ag4 N32 C32 C33 -176.0(12) . . . . ? 
N31 N32 C32 C46 174.7(11) . . . . ? 
Ag4 N32 C32 C46 0.7(15) . . . . ? 
N32 C32 C33 C34 -3(2) . . . . ? 
C46 C32 C33 C34 -179.2(15) . . . . ? 
C32 C33 C34 C35 5(2) . . . . ? 
N32 N31 C35 C34 -3(2) . . . . ? 
Ag3 N31 C35 C34 -169.3(12) . . . . ? 
N32 N31 C35 C36 176.5(13) . . . . ? 
Ag3 N31 C35 C36 9.8(17) . . . . ? 
C33 C34 C35 N31 -2(2) . . . . ? 
C33 C34 C35 C36 178.8(15) . . . . ? 
N31 C35 C36 N33 -10(2) . . . . ? 
C34 C35 C36 N33 169.3(15) . . . . ? 
C35 C36 N33 C38 -177.6(12) . . . . ? 
C35 C36 N33 Ag3 4.2(19) . . . . ? 
N62 Ag3 N33 C36 129.1(10) . . . . ? 
N31 Ag3 N33 C36 0.8(10) . . . . ? 
N64 Ag3 N33 C36 -129.7(11) . . . . ? 
N62 Ag3 N33 C38 -49.1(9) . . . . ? 
N31 Ag3 N33 C38 -177.4(9) . . . . ? 
N64 Ag3 N33 C38 52.1(11) . . . . ? 
C36 N33 C38 C39 1.8(15) . . . . ? 
Ag3 N33 C38 C39 179.9(4) . . . . ? 
C36 N33 C38 C43 -180.0(11) . . . . ? 
Ag3 N33 C38 C43 -1.9(9) . . . . ? 
C43 C38 C39 C40 0.01(14) . . . . ? 
N33 C38 C39 C40 178.1(7) . . . . ? 
C38 C39 C40 C41 0.02(15) . . . . ? 
C39 C40 C41 O31 -180.0(2) . . . . ? 
C39 C40 C41 C42 0.0(3) . . . . ? 
C40 C41 C42 C43 0.0(4) . . . . ? 
O31 C41 C42 C43 179.9(3) . . . . ? 
C41 C42 C43 C38 0.1(4) . . . . ? 
C39 C38 C43 C42 -0.1(3) . . . . ? 
N33 C38 C43 C42 -178.3(7) . . . . ? 
C40 C41 O31 C44 14.1(12) . . . . ? 
C42 C41 O31 C44 -165.9(12) . . . . ? 
N32 C32 C46 N34 -5.9(19) . . . . ? 
C33 C32 C46 N34 170.7(14) . . . . ? 
C32 C46 N34 C48 -176.8(10) . . . . ? 
C32 C46 N34 Ag4 8.0(16) . . . . ? 
N92 Ag4 N34 C46 -133.2(10) . . . . ? 
N32 Ag4 N34 C46 -5.7(9) . . . . ? 
N94 Ag4 N34 C46 123.8(10) . . . . ? 
N92 Ag4 N34 C48 51.9(12) . . . . ? 
N32 Ag4 N34 C48 179.4(9) . . . . ? 
N94 Ag4 N34 C48 -51.1(10) . . . . ? 
C46 N34 C48 C53 -170.8(10) . . . . ? 
Ag4 N34 C48 C53 4.0(10) . . . . ? 
C46 N34 C48 C49 7.8(14) . . . . ? 
Ag4 N34 C48 C49 -177.4(5) . . . . ? 
C53 C48 C49 C50 0.00(15) . . . . ? 
N34 C48 C49 C50 -178.6(8) . . . . ? 
C48 C49 C50 C51 -0.03(15) . . . . ? 
C49 C50 C51 C52 0.0(4) . . . . ? 
C49 C50 C51 O32 179.94(18) . . . . ? 
C50 C51 C52 C53 0.0(4) . . . . ? 
O32 C51 C52 C53 -179.9(3) . . . . ? 
C49 C48 C53 C52 0.0(3) . . . . ? 
N34 C48 C53 C52 178.7(7) . . . . ? 
C51 C52 C53 C48 0.0(4) . . . . ? 
C50 C51 O32 C54 169.3(15) . . . . ? 
C52 C51 O32 C54 -10.8(16) . . . . ? 
N1 Ag1 N61 C65 132.9(9) . . . . ? 
N63 Ag1 N61 C65 1.6(9) . . . . ? 
N3 Ag1 N61 C65 -123.2(10) . . . . ? 
N1 Ag1 N61 N62 -46.3(10) . . . . ? 
N63 Ag1 N61 N62 -177.5(9) . . . . ? 
N3 Ag1 N61 N62 57.6(11) . . . . ? 
C65 N61 N62 C62 -1.1(17) . . . . ? 
Ag1 N61 N62 C62 178.0(9) . . . . ? 
C65 N61 N62 Ag3 177.3(9) . . . . ? 
Ag1 N61 N62 Ag3 -3.6(12) . . . . ? 
N31 Ag3 N62 C62 -124.2(9) . . . . ? 
N33 Ag3 N62 C62 143.3(9) . . . . ? 
N64 Ag3 N62 C62 0.1(9) . . . . ? 
N31 Ag3 N62 N61 57.4(11) . . . . ? 
N33 Ag3 N62 N61 -35.1(10) . . . . ? 
N64 Ag3 N62 N61 -178.3(10) . . . . ? 
N61 N62 C62 C63 1.2(19) . . . . ? 
Ag3 N62 C62 C63 -177.3(10) . . . . ? 
N61 N62 C62 C76 178.6(11) . . . . ? 
Ag3 N62 C62 C76 0.0(16) . . . . ? 
N62 C62 C63 C64 1(2) . . . . ? 
C76 C62 C63 C64 -176.4(14) . . . . ? 
C62 C63 C64 C65 -3(2) . . . . ? 
C63 C64 C65 N61 3(2) . . . . ? 
C63 C64 C65 C66 -174.7(13) . . . . ? 
N62 N61 C65 C64 -1(2) . . . . ? 
Ag1 N61 C65 C64 179.6(11) . . . . ? 
N62 N61 C65 C66 176.9(11) . . . . ? 
Ag1 N61 C65 C66 -2.2(14) . . . . ? 
C64 C65 C66 N63 179.8(14) . . . . ? 
N61 C65 C66 N63 1.7(19) . . . . ? 
C65 C66 N63 C68 177.6(10) . . . . ? 
C65 C66 N63 Ag1 -0.2(17) . . . . ? 
N1 Ag1 N63 C66 -116.8(10) . . . . ? 
N3 Ag1 N63 C66 142.5(10) . . . . ? 
N61 Ag1 N63 C66 -0.7(9) . . . . ? 
N1 Ag1 N63 C68 65.4(9) . . . . ? 
N3 Ag1 N63 C68 -35.3(9) . . . . ? 
N61 Ag1 N63 C68 -178.5(8) . . . . ? 
C66 N63 C68 C73 -170.4(10) . . . . ? 
Ag1 N63 C68 C73 7.3(10) . . . . ? 
C66 N63 C68 C69 8.7(15) . . . . ? 
Ag1 N63 C68 C69 -173.6(5) . . . . ? 
N62 C62 C76 N64 0(2) . . . . ? 
C63 C62 C76 N64 176.8(14) . . . . ? 
C62 C76 N64 C78 179.5(11) . . . . ? 
C62 C76 N64 Ag3 0.5(17) . . . . ? 
N62 Ag3 N64 C76 -0.3(10) . . . . ? 
N31 Ag3 N64 C76 128.6(10) . . . . ? 
N33 Ag3 N64 C76 -117.2(11) . . . . ? 
N62 Ag3 N64 C78 -179.4(9) . . . . ? 
N31 Ag3 N64 C78 -50.4(10) . . . . ? 
N33 Ag3 N64 C78 63.8(11) . . . . ? 
C76 N64 C78 C83 15.6(16) . . . . ? 
Ag3 N64 C78 C83 -165.4(6) . . . . ? 
C76 N64 C78 C79 -165.0(12) . . . . ? 
Ag3 N64 C78 C79 13.9(10) . . . . ? 
C83 C78 C79 C80 -0.01(15) . . . . ? 
N64 C78 C79 C80 -179.4(8) . . . . ? 
C78 C79 C80 C81 -0.02(15) . . . . ? 
C79 C80 C81 O62 179.96(19) . . . . ? 
C79 C80 C81 C82 0.0(3) . . . . ? 
C80 C81 C82 C83 0.0(4) . . . . ? 
O62 C81 C82 C83 -179.9(3) . . . . ? 
C79 C78 C83 C82 0.0(3) . . . . ? 
N64 C78 C83 C82 179.3(8) . . . . ? 
C81 C82 C83 C78 0.0(4) . . . . ? 
C80 C81 O62 C84 161.2(16) . . . . ? 
C82 C81 O62 C84 -18.9(17) . . . . ? 
N2 Ag2 N91 C95 -131.1(9) . . . . ? 
N93 Ag2 N91 C95 -2.8(9) . . . . ? 
N4 Ag2 N91 C95 137.5(9) . . . . ? 
N2 Ag2 N91 N92 53.5(11) . . . . ? 
N93 Ag2 N91 N92 -178.3(10) . . . . ? 
N4 Ag2 N91 N92 -38.0(10) . . . . ? 
C95 N91 N92 C92 3.1(17) . . . . ? 
Ag2 N91 N92 C92 178.5(9) . . . . ? 
C95 N91 N92 Ag4 -176.9(9) . . . . ? 
Ag2 N91 N92 Ag4 -1.5(12) . . . . ? 
N32 Ag4 N92 N91 -51.0(10) . . . . ? 
N34 Ag4 N92 N91 61.3(12) . . . . ? 
N94 Ag4 N92 N91 -179.5(10) . . . . ? 
N32 Ag4 N92 C92 129.0(9) . . . . ? 
N34 Ag4 N92 C92 -118.7(10) . . . . ? 
N94 Ag4 N92 C92 0.5(9) . . . . ? 
N91 N92 C92 C93 -4(2) . . . . ? 
Ag4 N92 C92 C93 176.3(13) . . . . ? 
N91 N92 C92 C106 179.1(11) . . . . ? 
Ag4 N92 C92 C106 -0.9(16) . . . . ? 
N92 C92 C93 C94 2(2) . . . . ? 
C106 C92 C93 C94 179.4(14) . . . . ? 
C92 C93 C94 C95 -1(2) . . . . ? 
N92 N91 C95 C94 -1(2) . . . . ? 
Ag2 N91 C95 C94 -177.2(12) . . . . ? 
N92 N91 C95 C96 178.4(11) . . . . ? 
Ag2 N91 C95 C96 2.7(15) . . . . ? 
C93 C94 C95 N91 0(2) . . . . ? 
C93 C94 C95 C96 -179.7(13) . . . . ? 
N91 C95 C96 N93 -0.6(19) . . . . ? 
C94 C95 C96 N93 179.3(14) . . . . ? 
C95 C96 N93 C98 179.1(10) . . . . ? 
C95 C96 N93 Ag2 -1.9(16) . . . . ? 
N2 Ag2 N93 C96 133.8(9) . . . . ? 
N91 Ag2 N93 C96 2.3(9) . . . . ? 
N4 Ag2 N93 C96 -110.5(10) . . . . ? 
N2 Ag2 N93 C98 -47.2(10) . . . . ? 
N91 Ag2 N93 C98 -178.7(9) . . . . ? 
N4 Ag2 N93 C98 68.5(11) . . . . ? 
C96 N93 C98 C99 19.1(14) . . . . ? 
Ag2 N93 C98 C99 -159.9(6) . . . . ? 
C96 N93 C98 C103 -163.8(10) . . . . ? 
Ag2 N93 C98 C103 17.3(10) . . . . ? 
C103 C98 C99 C100 0.00(14) . . . . ? 
N93 C98 C99 C100 177.1(8) . . . . ? 
C98 C99 C100 C101 0.01(16) . . . . ? 
C99 C100 C101 C102 0.0(3) . . . . ? 
C99 C100 C101 O91 -179.97(19) . . . . ? 
C100 C101 C102 C103 0.0(4) . . . . ? 
O91 C101 C102 C103 180.0(3) . . . . ? 
C101 C102 C103 C98 0.0(5) . . . . ? 
C99 C98 C103 C102 0.0(3) . . . . ? 
N93 C98 C103 C102 -177.4(8) . . . . ? 
C100 C101 O91 C104 -177.3(13) . . . . ? 
C102 C101 O91 C104 2.7(14) . . . . ? 
C93 C92 C106 N94 -176.3(15) . . . . ? 
N92 C92 C106 N94 0.9(19) . . . . ? 
C92 C106 N94 C108 -179.7(11) . . . . ? 
C92 C106 N94 Ag4 -0.5(16) . . . . ? 
N92 Ag4 N94 C106 0.0(9) . . . . ? 
N32 Ag4 N94 C106 -120.4(10) . . . . ? 
N34 Ag4 N94 C106 143.2(9) . . . . ? 
N92 Ag4 N94 C108 179.2(9) . . . . ? 
N32 Ag4 N94 C108 58.9(10) . . . . ? 
N34 Ag4 N94 C108 -37.6(10) . . . . ? 
C106 N94 C108 C113 -0.8(16) . . . . ? 
Ag4 N94 C108 C113 -180.0(6) . . . . ? 
C106 N94 C108 C109 175.3(11) . . . . ? 
Ag4 N94 C108 C109 -3.9(11) . . . . ? 
C113 C108 C109 C110 -0.04(14) . . . . ? 
N94 C108 C109 C110 -176.6(8) . . . . ? 
C108 C109 C110 C111 0.00(16) . . . . ? 
C109 C110 C111 C112 -0.1(3) . . . . ? 
C109 C110 C111 O92 180.0(2) . . . . ? 
C110 C111 C112 C113 0.2(4) . . . . ? 
O92 C111 C112 C113 -179.8(3) . . . . ? 
C111 C112 C113 C108 -0.3(5) . . . . ? 
C109 C108 C113 C112 0.2(3) . . . . ? 
N94 C108 C113 C112 176.2(10) . . . . ? 
C110 C111 O92 C114 38(3) . . . . ? 
C112 C111 O92 C114 -142(3) . . . . ? 
N123 Ag5 N121 N122 -179(100) . . . . ? 
N181 Ag5 N121 N122 48.9(13) . . . . ? 
N183 Ag5 N121 N122 -42.5(11) . . . . ? 
N123 Ag5 N121 C125 0.0(8) . . . . ? 
N181 Ag5 N121 C125 -131.8(9) . . . . ? 
N183 Ag5 N121 C125 136.8(9) . . . . ? 
C125 N121 N122 C122 1.2(19) . . . . ? 
Ag5 N121 N122 C122 -179.7(10) . . . . ? 
C125 N121 N122 Ag6 -175.3(9) . . . . ? 
Ag5 N121 N122 Ag6 3.9(14) . . . . ? 
N211 Ag6 N122 C122 139.8(10) . . . . ? 
N213 Ag6 N122 C122 -114.8(11) . . . . ? 
N124 Ag6 N122 C122 1.0(10) . . . . ? 
N211 Ag6 N122 N121 -43.6(12) . . . . ? 
N213 Ag6 N122 N121 61.7(13) . . . . ? 
N124 Ag6 N122 N121 177.5(11) . . . . ? 
N121 N122 C122 C123 2(2) . . . . ? 
Ag6 N122 C122 C123 179.0(11) . . . . ? 
N121 N122 C122 C136 -178.3(11) . . . . ? 
Ag6 N122 C122 C136 -1.6(17) . . . . ? 
N122 C122 C123 C124 -2(2) . . . . ? 
C136 C122 C123 C124 178.7(13) . . . . ? 
C122 C123 C124 C125 -2(2) . . . . ? 
N122 N121 C125 C126 -177.6(12) . . . . ? 
Ag5 N121 C125 C126 3.2(15) . . . . ? 
N122 N121 C125 C124 -4.8(19) . . . . ? 
Ag5 N121 C125 C124 176.0(10) . . . . ? 
C123 C124 C125 N121 5(2) . . . . ? 
C123 C124 C125 C126 177.3(14) . . . . ? 
N121 C125 C126 N123 -7(2) . . . . ? 
C124 C125 C126 N123 -179.3(13) . . . . ? 
C125 C126 N123 C128 178.2(11) . . . . ? 
C125 C126 N123 Ag5 6.6(17) . . . . ? 
N181 Ag5 N123 C126 136.3(10) . . . . ? 
N183 Ag5 N123 C126 -108.9(10) . . . . ? 
N121 Ag5 N123 C126 -3.2(9) . . . . ? 
N181 Ag5 N123 C128 -35.5(11) . . . . ? 
N183 Ag5 N123 C128 79.4(10) . . . . ? 
N121 Ag5 N123 C128 -175.0(9) . . . . ? 
C126 N123 C128 C133 -173.1(10) . . . . ? 
Ag5 N123 C128 C133 -2.1(10) . . . . ? 
C126 N123 C128 C129 9.9(15) . . . . ? 
Ag5 N123 C128 C129 -179.1(5) . . . . ? 
C133 C128 C129 C130 -0.02(15) . . . . ? 
N123 C128 C129 C130 177.0(8) . . . . ? 
C128 C129 C130 C131 0.07(16) . . . . ? 
C129 C130 C131 O121 -179.91(18) . . . . ? 
C129 C130 C131 C132 -0.1(3) . . . . ? 
C130 C131 C132 C133 0.2(4) . . . . ? 
O121 C131 C132 C133 179.9(3) . . . . ? 
C129 C128 C133 C132 0.1(4) . . . . ? 
N123 C128 C133 C132 -177.1(8) . . . . ? 
C131 C132 C133 C128 -0.1(5) . . . . ? 
C130 C131 O121 C134 -176.7(14) . . . . ? 
C132 C131 O121 C134 3.6(15) . . . . ? 
N122 C122 C136 N124 1(2) . . . . ? 
C123 C122 C136 N124 -179.2(13) . . . . ? 
C122 C136 N124 C138 171.4(10) . . . . ? 
C122 C136 N124 Ag6 -0.4(15) . . . . ? 
N122 Ag6 N124 C136 -0.3(9) . . . . ? 
N211 Ag6 N124 C136 -117.1(10) . . . . ? 
N213 Ag6 N124 C136 143.4(9) . . . . ? 
N122 Ag6 N124 C138 -172.3(9) . . . . ? 
N211 Ag6 N124 C138 70.8(11) . . . . ? 
N213 Ag6 N124 C138 -28.6(9) . . . . ? 
C136 N124 C138 C143 177.2(11) . . . . ? 
Ag6 N124 C138 C143 -11.6(10) . . . . ? 
C136 N124 C138 C139 0.2(16) . . . . ? 
Ag6 N124 C138 C139 171.3(6) . . . . ? 
C143 C138 C139 C140 -0.05(16) . . . . ? 
N124 C138 C139 C140 176.7(9) . . . . ? 
C138 C139 C140 C141 0.02(15) . . . . ? 
C139 C140 C141 C142 -0.1(4) . . . . ? 
C139 C140 C141 O122 -179.9(2) . . . . ? 
C140 C141 C142 C143 0.1(5) . . . . ? 
O122 C141 C142 C143 -180.0(3) . . . . ? 
C139 C138 C143 C142 0.1(3) . . . . ? 
N124 C138 C143 C142 -177.0(8) . . . . ? 
C141 C142 C143 C138 -0.1(4) . . . . ? 
C140 C141 O122 C144 0(2) . . . . ? 
C142 C141 O122 C144 -179.5(19) . . . . ? 
N153 Ag7 N151 C155 -1.1(9) . . . . ? 
N184 Ag7 N151 C155 -125.3(11) . . . . ? 
N182 Ag7 N151 C155 141.1(9) . . . . ? 
N153 Ag7 N151 N152 178.9(11) . . . . ? 
N184 Ag7 N151 N152 54.7(13) . . . . ? 
N182 Ag7 N151 N152 -38.9(11) . . . . ? 
C155 N151 N152 C152 3.6(19) . . . . ? 
Ag7 N151 N152 C152 -176.4(9) . . . . ? 
C155 N151 N152 Ag8 -179.6(10) . . . . ? 
Ag7 N151 N152 Ag8 0.3(15) . . . . ? 
N154 Ag8 N152 N151 -178.7(12) . . . . ? 
N214 Ag8 N152 N151 -39.1(13) . . . . ? 
N212 Ag8 N152 N151 58.6(13) . . . . ? 
N154 Ag8 N152 C152 -2.0(10) . . . . ? 
N214 Ag8 N152 C152 137.6(10) . . . . ? 
N212 Ag8 N152 C152 -124.7(10) . . . . ? 
N152 N151 C155 C154 -3(2) . . . . ? 
Ag7 N151 C155 C154 176.6(10) . . . . ? 
N152 N151 C155 C156 179.5(12) . . . . ? 
Ag7 N151 C155 C156 -0.5(15) . . . . ? 
N151 C155 C156 N153 3(2) . . . . ? 
C154 C155 C156 N153 -173.5(15) . . . . ? 
C155 C156 N153 C158 177.9(11) . . . . ? 
C155 C156 N153 Ag7 -4.4(18) . . . . ? 
N151 Ag7 N153 C156 2.9(11) . . . . ? 
N184 Ag7 N153 C156 145.9(11) . . . . ? 
N182 Ag7 N153 C156 -102.1(13) . . . . ? 
N151 Ag7 N153 C158 -179(100) . . . . ? 
N184 Ag7 N153 C158 -36.5(12) . . . . ? 
N182 Ag7 N153 C158 75.5(13) . . . . ? 
C156 N153 C158 C159 -11.4(18) . . . . ? 
Ag7 N153 C158 C159 171.1(7) . . . . ? 
C156 N153 C158 C163 172.2(12) . . . . ? 
Ag7 N153 C158 C163 -5.3(12) . . . . ? 
N153 C158 C159 C160 -176.4(10) . . . . ? 
C163 C158 C159 C160 -0.02(14) . . . . ? 
C158 C159 C160 C161 0.01(14) . . . . ? 
C159 C160 C161 C162 0.0(3) . . . . ? 
C159 C160 C161 O151 180.0(2) . . . . ? 
C160 C161 C162 C163 0.1(4) . . . . ? 
O151 C161 C162 C163 -179.9(3) . . . . ? 
C161 C162 C163 C158 -0.1(4) . . . . ? 
N153 C158 C163 C162 176.9(9) . . . . ? 
C159 C158 C163 C162 0.1(3) . . . . ? 
N214 Ag8 N154 C166 -110.5(11) . . . . ? 
N212 Ag8 N154 C166 142.0(10) . . . . ? 
N152 Ag8 N154 C166 2.1(10) . . . . ? 
N214 Ag8 N154 C168 67.6(12) . . . . ? 
N212 Ag8 N154 C168 -39.9(10) . . . . ? 
N152 Ag8 N154 C168 -180(100) . . . . ? 
C166 N154 C168 C169 4.1(15) . . . . ? 
Ag8 N154 C168 C169 -173.9(5) . . . . ? 
C166 N154 C168 C173 -171.8(10) . . . . ? 
Ag8 N154 C168 C173 10.2(10) . . . . ? 
N154 C168 C169 C170 -176.2(7) . . . . ? 
C173 C168 C169 C170 -0.03(15) . . . . ? 
C168 C169 C170 C171 -0.03(16) . . . . ? 
C169 C170 C171 O152 -178.6(7) . . . . ? 
C169 C170 C171 C172 0.0(4) . . . . ? 
C170 C171 C172 C173 0.0(5) . . . . ? 
O152 C171 C172 C173 178.6(8) . . . . ? 
C171 C172 C173 C168 -0.1(5) . . . . ? 
N154 C168 C173 C172 176.5(7) . . . . ? 
C169 C168 C173 C172 0.1(4) . . . . ? 
C170 C171 O152 C174 -179.8(15) . . . . ? 
C172 C171 O152 C174 1.5(19) . . . . ? 
N123 Ag5 N181 N182 -30.8(16) . . . . ? 
N183 Ag5 N181 N182 -172.8(14) . . . . ? 
N121 Ag5 N181 N182 79.8(13) . . . . ? 
N123 Ag5 N181 C185 142.0(10) . . . . ? 
N183 Ag5 N181 C185 -0.1(10) . . . . ? 
N121 Ag5 N181 C185 -107.5(12) . . . . ? 
C185 N181 N182 C182 9(2) . . . . ? 
Ag5 N181 N182 C182 -178.4(11) . . . . ? 
C185 N181 N182 Ag7 -165.4(11) . . . . ? 
Ag5 N181 N182 Ag7 6.9(19) . . . . ? 
N153 Ag7 N182 N181 54.1(16) . . . . ? 
N151 Ag7 N182 N181 -37.3(14) . . . . ? 
N184 Ag7 N182 N181 -178.7(14) . . . . ? 
N153 Ag7 N182 C182 -121.2(12) . . . . ? 
N151 Ag7 N182 C182 147.3(10) . . . . ? 
N184 Ag7 N182 C182 6.0(11) . . . . ? 
N181 N182 C182 C183 -6(2) . . . . ? 
Ag7 N182 C182 C183 169.4(13) . . . . ? 
N181 N182 C182 C196 179.9(15) . . . . ? 
Ag7 N182 C182 C196 -4.7(19) . . . . ? 
N182 C182 C183 C184 -1(3) . . . . ? 
C196 C182 C183 C184 172.7(17) . . . . ? 
C182 C183 C184 C185 4(3) . . . . ? 
N182 N181 C185 C184 -5(2) . . . . ? 
Ag5 N181 C185 C184 -178.9(12) . . . . ? 
N182 N181 C185 C186 176.8(14) . . . . ? 
Ag5 N181 C185 C186 3.3(19) . . . . ? 
C183 C184 C185 N181 -1(2) . . . . ? 
C183 C184 C185 C186 176.8(16) . . . . ? 
N181 C185 C186 N183 -7(2) . . . . ? 
C184 C185 C186 N183 175.1(15) . . . . ? 
C185 C186 N183 C188 -177.1(13) . . . . ? 
C185 C186 N183 Ag5 6.5(19) . . . . ? 
N123 Ag5 N183 C186 -137.6(10) . . . . ? 
N181 Ag5 N183 C186 -3.3(10) . . . . ? 
N121 Ag5 N183 C186 133.3(10) . . . . ? 
N123 Ag5 N183 C188 46.0(12) . . . . ? 
N181 Ag5 N183 C188 -179.8(10) . . . . ? 
N121 Ag5 N183 C188 -43.2(10) . . . . ? 
C186 N183 C188 C193 175.7(11) . . . . ? 
Ag5 N183 C188 C193 -8.2(10) . . . . ? 
C186 N183 C188 C189 -0.8(16) . . . . ? 
Ag5 N183 C188 C189 175.3(5) . . . . ? 
N183 C188 C189 C190 176.5(8) . . . . ? 
C193 C188 C189 C190 -0.02(14) . . . . ? 
C188 C189 C190 C191 0.06(15) . . . . ? 
C189 C190 C191 O181 -179.9(2) . . . . ? 
C189 C190 C191 C192 -0.1(3) . . . . ? 
O181 C191 C192 C193 179.9(3) . . . . ? 
C190 C191 C192 C193 0.1(4) . . . . ? 
C191 C192 C193 C188 -0.1(5) . . . . ? 
N183 C188 C193 C192 -176.7(8) . . . . ? 
C189 C188 C193 C192 0.0(3) . . . . ? 
C190 C191 O181 C194 10.2(11) . . . . ? 
C192 C191 O181 C194 -169.6(11) . . . . ? 
C183 C182 C196 N184 -175.9(18) . . . . ? 
N182 C182 C196 N184 -2(3) . . . . ? 
C182 C196 N184 C198 -177.4(15) . . . . ? 
C182 C196 N184 Ag7 8(2) . . . . ? 
N153 Ag7 N184 C196 138.6(11) . . . . ? 
N151 Ag7 N184 C196 -114.1(13) . . . . ? 
N182 Ag7 N184 C196 -7.2(12) . . . . ? 
N153 Ag7 N184 C198 -36.0(13) . . . . ? 
N151 Ag7 N184 C198 71.3(13) . . . . ? 
N182 Ag7 N184 C198 178.3(12) . . . . ? 
C196 N184 C198 C203 -175.2(14) . . . . ? 
Ag7 N184 C198 C203 -1.4(13) . . . . ? 
C196 N184 C198 C199 6(2) . . . . ? 
Ag7 N184 C198 C199 179.8(6) . . . . ? 
C203 C198 C199 C200 0.01(15) . . . . ? 
N184 C198 C199 C200 178.8(11) . . . . ? 
C198 C199 C200 C201 -0.07(16) . . . . ? 
C199 C200 C201 O182 179.9(3) . . . . ? 
C199 C200 C201 C202 0.1(3) . . . . ? 
O182 C201 C202 C203 -179.9(3) . . . . ? 
C200 C201 C202 C203 -0.1(5) . . . . ? 
N184 C198 C203 C202 -179.0(10) . . . . ? 
C199 C198 C203 C202 0.0(3) . . . . ? 
C201 C202 C203 C198 0.1(5) . . . . ? 
C200 C201 O182 C204 -9.0(14) . . . . ? 
C202 C201 O182 C204 170.7(13) . . . . ? 
N122 Ag6 N211 N212 -35.1(15) . . . . ? 
N213 Ag6 N211 N212 -179.9(14) . . . . ? 
N124 Ag6 N211 N212 64.0(15) . . . . ? 
N122 Ag6 N211 C215 153.8(11) . . . . ? 
N213 Ag6 N211 C215 9.0(11) . . . . ? 
N124 Ag6 N211 C215 -107.1(14) . . . . ? 
C215 N211 N212 C212 1(2) . . . . ? 
Ag6 N211 N212 C212 -169.0(11) . . . . ? 
C215 N211 N212 Ag8 -179.2(11) . . . . ? 
Ag6 N211 N212 Ag8 10.4(18) . . . . ? 
N154 Ag8 N212 N211 -37.6(14) . . . . ? 
N214 Ag8 N212 N211 -179.4(13) . . . . ? 
N152 Ag8 N212 N211 66.5(14) . . . . ? 
N154 Ag8 N212 C212 141.9(9) . . . . ? 
N214 Ag8 N212 C212 0.1(10) . . . . ? 
N152 Ag8 N212 C212 -114.0(11) . . . . ? 
N211 N212 C212 C226 -179.7(15) . . . . ? 
Ag8 N212 C212 C226 0.8(19) . . . . ? 
N211 N212 C212 C213 -3(2) . . . . ? 
Ag8 N212 C212 C213 177.5(12) . . . . ? 
N212 C212 C213 C214 4(2) . . . . ? 
C226 C212 C213 C214 -179.5(17) . . . . ? 
C212 C213 C214 C215 -3(3) . . . . ? 
N212 N211 C215 C216 -178.4(15) . . . . ? 
Ag6 N211 C215 C216 -7(2) . . . . ? 
N212 N211 C215 C214 0(3) . . . . ? 
Ag6 N211 C215 C214 171.5(14) . . . . ? 
C213 C214 C215 N211 1(3) . . . . ? 
C213 C214 C215 C216 179.1(17) . . . . ? 
N211 C215 C216 N213 -4(3) . . . . ? 
C214 C215 C216 N213 178.0(16) . . . . ? 
C215 C216 N213 C218 -175.8(14) . . . . ? 
C215 C216 N213 Ag6 12(2) . . . . ? 
N122 Ag6 N213 C216 -130.7(11) . . . . ? 
N211 Ag6 N213 C216 -10.7(10) . . . . ? 
N124 Ag6 N213 C216 128.5(10) . . . . ? 
N122 Ag6 N213 C218 56.5(12) . . . . ? 
N211 Ag6 N213 C218 176.6(10) . . . . ? 
N124 Ag6 N213 C218 -44.2(10) . . . . ? 
C216 N213 C218 C223 -177.9(12) . . . . ? 
Ag6 N213 C218 C223 -6.2(11) . . . . ? 
C216 N213 C218 C219 -0.5(18) . . . . ? 
Ag6 N213 C218 C219 171.1(5) . . . . ? 
C223 C218 C219 C220 0.03(16) . . . . ? 
N213 C218 C219 C220 -177.3(9) . . . . ? 
C218 C219 C220 C221 -0.08(15) . . . . ? 
C219 C220 C221 O211 179.8(2) . . . . ? 
C219 C220 C221 C222 0.1(3) . . . . ? 
C220 C221 O211 C224 -1.8(12) . . . . ? 
C222 C221 O211 C224 177.9(12) . . . . ? 
O211 C221 C222 C223 -179.8(3) . . . . ? 
C220 C221 C222 C223 -0.1(5) . . . . ? 
C219 C218 C223 C222 0.0(4) . . . . ? 
N213 C218 C223 C222 177.5(9) . . . . ? 
C221 C222 C223 C218 0.1(5) . . . . ? 
N212 C212 C226 N214 -2(3) . . . . ? 
C213 C212 C226 N214 -178.5(15) . . . . ? 
C212 C226 N214 C228 -177.7(13) . . . . ? 
C212 C226 N214 Ag8 1.8(19) . . . . ? 
N154 Ag8 N214 C226 -125.8(12) . . . . ? 
N212 Ag8 N214 C226 -1.0(11) . . . . ? 
N152 Ag8 N214 C226 138.2(11) . . . . ? 
N154 Ag8 N214 C228 53.7(13) . . . . ? 
N212 Ag8 N214 C228 178.4(11) . . . . ? 
N152 Ag8 N214 C228 -42.4(11) . . . . ? 
C226 N214 C228 C233 175.4(11) . . . . ? 
Ag8 N214 C228 C233 -4.0(12) . . . . ? 
C226 N214 C228 C229 -3.5(18) . . . . ? 
Ag8 N214 C228 C229 177.1(5) . . . . ? 
N214 C228 C229 C230 178.8(9) . . . . ? 
C233 C228 C229 C230 -0.04(14) . . . . ? 
C228 C229 C230 C231 0.10(16) . . . . ? 
C229 C230 C231 O212 -179.8(2) . . . . ? 
C229 C230 C231 C232 -0.2(3) . . . . ? 
C234 O212 C231 C230 1.0(12) . . . . ? 
C234 O212 C231 C232 -178.6(12) . . . . ? 
C230 C231 C232 C233 0.3(4) . . . . ? 
O212 C231 C232 C233 179.9(3) . . . . ? 
C231 C232 C233 C228 -0.3(5) . . . . ? 
N214 C228 C233 C232 -178.9(9) . . . . ? 
C229 C228 C233 C232 0.1(4) . . . . ? 
C246 C241 C242 C243 0.0 . . . . ? 
C241 C242 C243 C244 0.0 . . . . ? 
C242 C243 C244 C245 0.0 . . . . ? 
C243 C244 C245 C246 0.0 . . . . ? 
C244 C245 C246 C241 0.0 . . . . ? 
C242 C241 C246 C245 0.0 . . . . ? 
C256 C251 C252 C253 0.0 . . . . ? 
C251 C252 C253 C254 0.0 . . . . ? 
C252 C253 C254 C255 0.0 . . . . ? 
C253 C254 C255 C256 0.0 . . . . ? 
C254 C255 C256 C251 0.0 . . . . ? 
C252 C251 C256 C255 0.0 . . . . ? 
C266 C261 C262 C263 0.0 . . . . ? 
C261 C262 C263 C264 0.0 . . . . ? 
C262 C263 C264 C265 0.0 . . . . ? 
C263 C264 C265 C266 0.0 . . . . ? 
C264 C265 C266 C261 0.0 . . . . ? 
C262 C261 C266 C265 0.0 . . . . ? 
C152 C153 C154 C155 1(2) . . . . ? 
N151 C155 C154 C153 1(2) . . . . ? 
C156 C155 C154 C153 178.0(13) . . . . ? 
C69 C68 C73 C72 -0.1(4) . . . . ? 
N63 C68 C73 C72 179.0(8) . . . . ? 
C74 O61 C71 C70 -171.6(16) . . . . ? 
C74 O61 C71 C72 8.3(17) . . . . ? 
C162 C161 O151 C164 157(3) . . . . ? 
C160 C161 O151 C164 -23(3) . . . . ? 
C68 C73 C72 C71 0.2(5) . . . . ? 
O61 C71 C72 C73 179.9(3) . . . . ? 
C70 C71 C72 C73 -0.1(4) . . . . ? 
N151 N152 C152 C153 -2(2) . . . . ? 
Ag8 N152 C152 C153 -178.9(12) . . . . ? 
N151 N152 C152 C166 178.7(11) . . . . ? 
Ag8 N152 C152 C166 1.6(15) . . . . ? 
C154 C153 C152 N152 0(2) . . . . ? 
C154 C153 C152 C166 179.2(13) . . . . ? 
C73 C68 C69 C70 0.06(15) . . . . ? 
N63 C68 C69 C70 -179.1(8) . . . . ? 
O61 C71 C70 C69 180.0(2) . . . . ? 
C72 C71 C70 C69 0.0(3) . . . . ? 
C68 C69 C70 C71 0.00(15) . . . . ? 
C168 N154 C166 C152 179.8(10) . . . . ? 
Ag8 N154 C166 C152 -2.1(17) . . . . ? 
N152 C152 C166 N154 0(2) . . . . ? 
C153 C152 C166 N154 -179.2(14) . . . . ? 
 
_diffrn_measured_fraction_theta_max    0.996 
_diffrn_reflns_theta_full              21.97 
_diffrn_measured_fraction_theta_full   0.996 
_refine_diff_density_max    0.779 
_refine_diff_density_min   -0.582 
_refine_diff_density_rms    0.110 


#===END

 
data_jrp73 
 
_audit_creation_method            SHELXL-97 
_chemical_name_systematic 
; 
 ? 
; 
_chemical_name_common             ? 
_chemical_melting_point           ? 
_chemical_formula_moiety          ? 
_chemical_formula_sum 
 'C44 H32 Ag2 B2 Cl8 F8 N10 O4' 
_chemical_formula_weight         1437.76
 
loop_ 
 _atom_type_symbol 
 _atom_type_description 
 _atom_type_scat_dispersion_real 
 _atom_type_scat_dispersion_imag 
 _atom_type_scat_source 
 'C'  'C'   0.0033   0.0016 
 'International Tables Vol C Tables 4.2.6.8 and 6.1.1.4' 
 'H'  'H'   0.0000   0.0000 
 'International Tables Vol C Tables 4.2.6.8 and 6.1.1.4' 
 'B'  'B'   0.0013   0.0007 
 'International Tables Vol C Tables 4.2.6.8 and 6.1.1.4' 
 'N'  'N'   0.0061   0.0033 
 'International Tables Vol C Tables 4.2.6.8 and 6.1.1.4' 
 'O'  'O'   0.0106   0.0060 
 'International Tables Vol C Tables 4.2.6.8 and 6.1.1.4' 
 'F'  'F'   0.0171   0.0103 
 'International Tables Vol C Tables 4.2.6.8 and 6.1.1.4' 
 'Cl'  'Cl'   0.1484   0.1585 
 'International Tables Vol C Tables 4.2.6.8 and 6.1.1.4' 
 'Ag'  'Ag'  -0.8971   1.1015 
 'International Tables Vol C Tables 4.2.6.8 and 6.1.1.4' 
 
_symmetry_cell_setting            Triclinic 
_symmetry_space_group_name_H-M    P-1
 
loop_ 
 _symmetry_equiv_pos_as_xyz 
 'x, y, z' 
 '-x, -y, -z' 
 
_cell_length_a                    7.2637(14) 
_cell_length_b                    10.339(2) 
_cell_length_c                    36.685(8) 
_cell_angle_alpha                 97.592(4) 
_cell_angle_beta                  93.876(4) 
_cell_angle_gamma                 96.874(4) 
_cell_volume                      2701.6(10) 
_cell_formula_units_Z             2 
_cell_measurement_temperature     112(2) 
_cell_measurement_reflns_used     ? 
_cell_measurement_theta_min       ? 
_cell_measurement_theta_max       ? 
 
_exptl_crystal_description        needle 
_exptl_crystal_colour             orange
_exptl_crystal_size_max           0.40
_exptl_crystal_size_mid           0.10
_exptl_crystal_size_min           0.02 
_exptl_crystal_density_meas       ? 
_exptl_crystal_density_diffrn     1.767 
_exptl_crystal_density_method     'not measured' 
_exptl_crystal_F_000              1420 
_exptl_absorpt_coefficient_mu     1.201 
_exptl_absorpt_correction_type    'multi-scan' 
_exptl_absorpt_correction_T_min   0.75
_exptl_absorpt_correction_T_max   1.00 
_exptl_absorpt_process_details    'SADABS (Bruker AXS Inc., 2000)' 
 
_exptl_special_details 
; 
 ? 
; 
 
_diffrn_ambient_temperature       112(2) 
_diffrn_radiation_wavelength      0.71073 
_diffrn_radiation_type            MoK\a 
_diffrn_radiation_source          'fine-focus sealed tube' 
_diffrn_radiation_monochromator   graphite 
_diffrn_measurement_device_type   'Bruker SMART area detector' 
_diffrn_measurement_method        'CCD area detector'
_diffrn_detector_area_resol_mean  ? 
_diffrn_standards_number          ? 
_diffrn_standards_interval_count  ? 
_diffrn_standards_interval_time   ? 
_diffrn_standards_decay_%         ? 
_diffrn_reflns_number             19908 
_diffrn_reflns_av_R_equivalents   0.1130 
_diffrn_reflns_av_sigmaI/netI     0.2323 
_diffrn_reflns_limit_h_min        -8 
_diffrn_reflns_limit_h_max        8 
_diffrn_reflns_limit_k_min        -12 
_diffrn_reflns_limit_k_max        12 
_diffrn_reflns_limit_l_min        -40 
_diffrn_reflns_limit_l_max        45 
_diffrn_reflns_theta_min          2.00 
_diffrn_reflns_theta_max          26.41 
_reflns_number_total              10517 
_reflns_number_gt                 4908 
_reflns_threshold_expression      >2sigma(I) 
 
_computing_data_collection        ? 
_computing_cell_refinement        ? 
_computing_data_reduction         ? 
_computing_structure_solution     'SHELXS-97 (Sheldrick, 1990)' 
_computing_structure_refinement   'SHELXL-97 (Sheldrick, 1997)' 
_computing_molecular_graphics     ? 
_computing_publication_material   ? 
 
_refine_special_details 
; 
 Refinement of F^2^ against ALL reflections.  The weighted R-factor wR and 
 goodness of fit S are based on F^2^, conventional R-factors R are based 
 on F, with F set to zero for negative F^2^. The threshold expression of 
 F^2^ > 2sigma(F^2^) is used only for calculating R-factors(gt) etc. and is 
 not relevant to the choice of reflections for refinement.  R-factors based 
 on F^2^ are statistically about twice as large as those based on F, and R- 
 factors based on ALL data will be even larger. 

 All non-H ANIS. All H's calc and ride. No disorder. Two AgL strands in
 asym unit with, in each case, the other half of the side-by-side Ag2L2
 complex generated by symmetry. Each such complex has a benzene ring over
 one face. Weak interaction from each of the 2 indpt Ag(I) ions to one F
 of a BF4 anion. Nitromethane of solvation also present.
;
 
_refine_ls_structure_factor_coef  Fsqd  
_refine_ls_matrix_type            full 
_refine_ls_weighting_scheme       calc  
_refine_ls_weighting_details 
 'calc w=1/[\s^2^(Fo^2^)+(0.0180P)^2^+0.0000P] where P=(Fo^2^+2Fc^2^)/3' 
_atom_sites_solution_primary      direct 
_atom_sites_solution_secondary    difmap 
_atom_sites_solution_hydrogens    geom 
_refine_ls_hydrogen_treatment     mixed 
_refine_ls_extinction_method      none 
_refine_ls_extinction_coef        ? 
_refine_ls_number_reflns          10517 
_refine_ls_number_parameters      705 
_refine_ls_number_restraints      0 
_refine_ls_R_factor_all           0.1739 
_refine_ls_R_factor_gt            0.0644 
_refine_ls_wR_factor_ref          0.1162 
_refine_ls_wR_factor_gt           0.0943 
_refine_ls_goodness_of_fit_ref    0.923 
_refine_ls_restrained_S_all       0.923 
_refine_ls_shift/su_max           0.001 
_refine_ls_shift/su_mean          0.000 
 
loop_ 
 _atom_site_label 
 _atom_site_type_symbol 
 _atom_site_fract_x 
 _atom_site_fract_y 
 _atom_site_fract_z 
 _atom_site_U_iso_or_equiv 
 _atom_site_adp_type 
 _atom_site_occupancy 
 _atom_site_symmetry_multiplicity 
 _atom_site_calc_flag 
 _atom_site_refinement_flags 
 _atom_site_disorder_assembly 
 _atom_site_disorder_group 
Ag1 Ag 0.42248(9) 0.46273(6) 0.446834(16) 0.02851(19) Uani 1 1 d . . . 
N1 N 0.5382(8) 0.3086(6) 0.48320(16) 0.0195(15) Uani 1 1 d . . . 
N2 N 0.5889(8) 0.3343(6) 0.51967(15) 0.0195(15) Uani 1 1 d . . . 
C2 C 0.6878(10) 0.2524(7) 0.53555(19) 0.0174(18) Uani 1 1 d . . . 
C3 C 0.7269(10) 0.1335(7) 0.51581(18) 0.0208(18) Uani 1 1 d . . . 
H3 H 0.7880 0.0732 0.5281 0.025 Uiso 1 1 calc R . . 
C4 C 0.6760(10) 0.1066(7) 0.47891(19) 0.0227(19) Uani 1 1 d . . . 
H4 H 0.6979 0.0270 0.4647 0.027 Uiso 1 1 calc R . . 
C5 C 0.5890(10) 0.2025(7) 0.46278(19) 0.0165(18) Uani 1 1 d . . . 
C6 C 0.5563(10) 0.1919(8) 0.42222(19) 0.0187(18) Uani 1 1 d . . . 
H6 H 0.5608 0.1106 0.4071 0.022 Uiso 1 1 calc R . . 
N3 N 0.5216(8) 0.2940(6) 0.40754(15) 0.0207(15) Uani 1 1 d . . . 
C8 C 0.4986(10) 0.2830(7) 0.36794(18) 0.0171(17) Uani 1 1 d . . . 
C9 C 0.5459(10) 0.3974(7) 0.35294(19) 0.0209(18) Uani 1 1 d . . . 
H9 H 0.5930 0.4780 0.3680 0.025 Uiso 1 1 calc R . . 
C10 C 0.5210(9) 0.3887(7) 0.31451(19) 0.0186(18) Uani 1 1 d . . . 
Cl1 Cl 0.5787(3) 0.53281(19) 0.29420(5) 0.0299(5) Uani 1 1 d . . . 
C11 C 0.4515(10) 0.2737(8) 0.2916(2) 0.0229(19) Uani 1 1 d . . . 
H11 H 0.4394 0.2705 0.2655 0.027 Uiso 1 1 calc R . . 
C12 C 0.4004(10) 0.1638(8) 0.3080(2) 0.0235(19) Uani 1 1 d . . . 
Cl2 Cl 0.3067(3) 0.0173(2) 0.28054(5) 0.0349(6) Uani 1 1 d . . . 
C13 C 0.4211(9) 0.1656(7) 0.34651(19) 0.0207(18) Uani 1 1 d . . . 
H13 H 0.3835 0.0894 0.3574 0.025 Uiso 1 1 calc R . . 
C16 C 0.7658(10) 0.2956(8) 0.57417(19) 0.024(2) Uani 1 1 d . . . 
H16 H 0.8212 0.2360 0.5877 0.029 Uiso 1 1 calc R . . 
N4 N 0.7582(8) 0.4138(6) 0.58926(15) 0.0203(15) Uani 1 1 d . . . 
C18 C 0.8378(10) 0.4552(7) 0.62686(19) 0.0189(18) Uani 1 1 d . . . 
C19 C 0.9097(9) 0.5871(7) 0.63630(18) 0.0194(18) Uani 1 1 d . . . 
H19 H 0.9098 0.6459 0.6185 0.023 Uiso 1 1 calc R . . 
C20 C 0.9814(10) 0.6306(7) 0.6725(2) 0.0222(19) Uani 1 1 d . . . 
Cl3 Cl 1.0719(3) 0.79632(19) 0.68536(5) 0.0306(5) Uani 1 1 d . . . 
C21 C 0.9805(10) 0.5478(8) 0.69889(19) 0.0238(19) Uani 1 1 d . . . 
H21 H 1.0289 0.5800 0.7236 0.029 Uiso 1 1 calc R . . 
C22 C 0.9086(11) 0.4179(8) 0.68909(19) 0.025(2) Uani 1 1 d . . . 
Cl4 Cl 0.9075(3) 0.3118(2) 0.72265(5) 0.0402(6) Uani 1 1 d . . . 
C23 C 0.8348(10) 0.3683(7) 0.65316(19) 0.0207(18) Uani 1 1 d . . . 
H23 H 0.7841 0.2785 0.6467 0.025 Uiso 1 1 calc R . . 
Ag2 Ag 0.54026(9) 0.98370(6) 0.947110(15) 0.02779(18) Uani 1 1 d . . . 
N31 N 0.5727(8) 0.8149(6) 0.98539(15) 0.0193(15) Uani 1 1 d . . . 
N32 N 0.5554(8) 0.8305(6) 1.02141(16) 0.0208(15) Uani 1 1 d . . . 
C32 C 0.6229(9) 0.7469(7) 1.04222(18) 0.0136(17) Uani 1 1 d . . . 
C33 C 0.6943(10) 0.6342(7) 1.02666(19) 0.0223(19) Uani 1 1 d . . . 
H33 H 0.7266 0.5699 1.0413 0.027 Uiso 1 1 calc R . . 
C34 C 0.7162(10) 0.6197(7) 0.98954(19) 0.0238(19) Uani 1 1 d . . . 
H34 H 0.7698 0.5472 0.9779 0.029 Uiso 1 1 calc R . . 
C35 C 0.6570(10) 0.7153(7) 0.96933(19) 0.0150(17) Uani 1 1 d . . . 
C36 C 0.7047(10) 0.7183(8) 0.93046(18) 0.0208(19) Uani 1 1 d . . . 
H36 H 0.7498 0.6445 0.9174 0.025 Uiso 1 1 calc R . . 
N33 N 0.6855(8) 0.8194(6) 0.91458(15) 0.0201(15) Uani 1 1 d . . . 
C38 C 0.7334(10) 0.8189(7) 0.87763(18) 0.0173(17) Uani 1 1 d . . . 
C39 C 0.7918(9) 0.9416(7) 0.86699(18) 0.0182(18) Uani 1 1 d . . . 
H39 H 0.8000 1.0201 0.8840 0.022 Uiso 1 1 calc R . . 
C40 C 0.8377(10) 0.9460(7) 0.83068(19) 0.0199(18) Uani 1 1 d . . . 
Cl5 Cl 0.9095(3) 1.09845(19) 0.81681(5) 0.0301(5) Uani 1 1 d . . . 
C41 C 0.8305(10) 0.8347(8) 0.8053(2) 0.0241(19) Uani 1 1 d . . . 
H41 H 0.8652 0.8391 0.7809 0.029 Uiso 1 1 calc R . . 
C42 C 0.7692(10) 0.7138(7) 0.8170(2) 0.0221(19) Uani 1 1 d . . . 
Cl6 Cl 0.7538(3) 0.5702(2) 0.78555(5) 0.0333(5) Uani 1 1 d . . . 
C43 C 0.7195(10) 0.7043(7) 0.85239(18) 0.0203(18) Uani 1 1 d . . . 
H43 H 0.6768 0.6213 0.8593 0.024 Uiso 1 1 calc R . . 
C46 C 0.6249(9) 0.7797(7) 1.08257(19) 0.0167(18) Uani 1 1 d . . . 
H46 H 0.6448 0.7143 1.0978 0.020 Uiso 1 1 calc R . . 
N34 N 0.6004(8) 0.8943(6) 1.09743(14) 0.0153(14) Uani 1 1 d . . . 
C48 C 0.6133(10) 0.9242(7) 1.13692(19) 0.0196(18) Uani 1 1 d . . . 
C49 C 0.6637(9) 1.0559(8) 1.15063(19) 0.0207(19) Uani 1 1 d . . . 
H49 H 0.6885 1.1195 1.1345 0.025 Uiso 1 1 calc R . . 
C50 C 0.6769(10) 1.0929(7) 1.1894(2) 0.0225(19) Uani 1 1 d . . . 
Cl7 Cl 0.7313(3) 1.2581(2) 1.20782(5) 0.0306(5) Uani 1 1 d . . . 
C51 C 0.6413(10) 1.0007(8) 1.21341(19) 0.0233(19) Uani 1 1 d . . . 
H51 H 0.6505 1.0258 1.2394 0.028 Uiso 1 1 calc R . . 
C52 C 0.5918(11) 0.8705(8) 1.1974(2) 0.026(2) Uani 1 1 d . . . 
Cl8 Cl 0.5444(3) 0.7520(2) 1.22709(6) 0.0478(7) Uani 1 1 d . . . 
C53 C 0.5705(10) 0.8309(7) 1.15984(19) 0.0201(18) Uani 1 1 d . . . 
H53 H 0.5275 0.7420 1.1499 0.024 Uiso 1 1 calc R . . 
B1 B 0.0545(14) 0.0486(11) 0.4162(3) 0.034(3) Uani 1 1 d . . . 
F11 F 0.1779(7) 0.1195(5) 0.44423(15) 0.0660(17) Uani 1 1 d . . . 
F12 F -0.0574(7) 0.1318(4) 0.40175(11) 0.0431(13) Uani 1 1 d . . . 
F13 F -0.0578(6) -0.0484(4) 0.43094(11) 0.0356(12) Uani 1 1 d . . . 
F14 F 0.1482(8) -0.0140(5) 0.38931(14) 0.0649(17) Uani 1 1 d . . . 
B2 B 0.8641(14) 1.3672(10) 0.9170(3) 0.031(2) Uani 1 1 d . . . 
F21 F 0.7691(7) 1.3286(5) 0.94600(13) 0.0530(15) Uani 1 1 d . . . 
F22 F 0.7378(7) 1.3922(5) 0.88934(13) 0.0563(15) Uani 1 1 d . . . 
F23 F 0.9828(6) 1.4845(4) 0.92959(11) 0.0321(11) Uani 1 1 d . . . 
F24 F 0.9698(6) 1.2703(4) 0.90356(11) 0.0386(12) Uani 1 1 d . . . 
C60 C 0.9156(14) 0.6104(11) 0.4982(4) 0.062(3) Uani 1 1 d . . . 
H60 H 0.8561 0.6870 0.4972 0.074 Uiso 1 1 calc R . . 
C61 C 0.9077(15) 0.5189(15) 0.4672(3) 0.064(4) Uani 1 1 d . . . 
H61 H 0.8454 0.5328 0.4448 0.077 Uiso 1 1 calc R . . 
C62 C 0.9901(16) 0.4076(12) 0.4690(3) 0.052(3) Uani 1 1 d . . . 
H62 H 0.9831 0.3427 0.4478 0.063 Uiso 1 1 calc R . . 
C70 C 0.9164(13) 1.1123(11) 1.0028(5) 0.067(3) Uani 1 1 d . . . 
H70 H 0.8586 1.1903 1.0050 0.080 Uiso 1 1 calc R . . 
C71 C 0.9804(17) 1.0659(13) 0.9702(4) 0.059(4) Uani 1 1 d . . . 
H71 H 0.9656 1.1121 0.9497 0.071 Uiso 1 1 calc R . . 
C72 C 1.0634(16) 0.9571(16) 0.9664(3) 0.072(4) Uani 1 1 d . . . 
H72 H 1.1083 0.9264 0.9435 0.086 Uiso 1 1 calc R . . 
C80 C 0.2574(14) 0.1435(9) 0.6550(3) 0.059(3) Uani 1 1 d . . . 
H80A H 0.1672 0.1998 0.6646 0.071 Uiso 1 1 calc R . . 
H80B H 0.3561 0.1418 0.6745 0.071 Uiso 1 1 calc R . . 
H80C H 0.1945 0.0540 0.6470 0.071 Uiso 1 1 calc R . . 
N80 N 0.3389(12) 0.1956(8) 0.6236(2) 0.045(2) Uani 1 1 d . . . 
O80 O 0.2783(10) 0.2916(6) 0.61296(18) 0.065(2) Uani 1 1 d . . . 
O81 O 0.4573(9) 0.1366(7) 0.6079(2) 0.062(2) Uani 1 1 d . . . 
C90 C 0.1371(13) 0.4821(10) 0.8477(3) 0.058(3) Uani 1 1 d . . . 
H90A H 0.0267 0.5200 0.8395 0.070 Uiso 1 1 calc R . . 
H90B H 0.0987 0.3961 0.8552 0.070 Uiso 1 1 calc R . . 
H90C H 0.2174 0.4714 0.8274 0.070 Uiso 1 1 calc R . . 
N90 N 0.2389(12) 0.5694(9) 0.8788(2) 0.049(2) Uani 1 1 d . . . 
O90 O 0.1941(10) 0.6783(7) 0.8880(2) 0.074(2) Uani 1 1 d . . . 
O91 O 0.3701(9) 0.5262(6) 0.89567(18) 0.0535(18) Uani 1 1 d . . . 
 
loop_ 
 _atom_site_aniso_label 
 _atom_site_aniso_U_11 
 _atom_site_aniso_U_22 
 _atom_site_aniso_U_33 
 _atom_site_aniso_U_23 
 _atom_site_aniso_U_13 
 _atom_site_aniso_U_12 
Ag1 0.0418(5) 0.0217(4) 0.0234(4) 0.0029(3) -0.0046(3) 0.0140(3) 
N1 0.016(4) 0.020(4) 0.024(4) 0.010(3) 0.001(3) 0.001(3) 
N2 0.023(4) 0.027(4) 0.008(3) 0.007(3) -0.001(2) -0.004(3) 
C2 0.016(5) 0.016(5) 0.023(5) 0.013(4) 0.003(3) 0.001(3) 
C3 0.030(5) 0.021(5) 0.015(4) 0.015(4) -0.001(3) 0.003(4) 
C4 0.030(5) 0.017(5) 0.021(5) 0.003(4) 0.005(3) -0.001(4) 
C5 0.026(5) 0.007(4) 0.016(4) 0.001(3) 0.004(3) 0.002(3) 
C6 0.021(5) 0.014(5) 0.019(4) -0.002(4) 0.003(3) 0.000(3) 
N3 0.027(4) 0.019(4) 0.015(4) 0.007(3) -0.005(3) 0.001(3) 
C8 0.022(5) 0.014(5) 0.016(4) 0.006(4) -0.001(3) 0.005(3) 
C9 0.023(5) 0.012(5) 0.028(5) 0.006(4) 0.000(3) 0.002(3) 
C10 0.014(4) 0.019(5) 0.024(5) 0.008(4) 0.002(3) 0.001(3) 
Cl1 0.0329(13) 0.0265(13) 0.0320(12) 0.0174(10) -0.0023(8) -0.0010(9) 
C11 0.021(5) 0.030(5) 0.019(4) 0.008(4) 0.001(3) 0.007(4) 
C12 0.020(5) 0.023(5) 0.027(5) 0.000(4) 0.002(3) 0.003(4) 
Cl2 0.0510(15) 0.0239(13) 0.0262(12) -0.0021(10) 0.0002(9) -0.0015(10) 
C13 0.017(5) 0.022(5) 0.025(5) 0.008(4) 0.002(3) 0.005(3) 
C16 0.024(5) 0.028(6) 0.020(5) 0.007(4) 0.002(3) -0.001(4) 
N4 0.020(4) 0.022(4) 0.020(4) 0.007(3) 0.004(3) -0.001(3) 
C18 0.021(5) 0.017(5) 0.018(4) -0.002(4) 0.003(3) 0.000(3) 
C19 0.018(5) 0.024(5) 0.016(4) 0.009(4) 0.004(3) -0.003(3) 
C20 0.024(5) 0.014(5) 0.027(5) -0.003(4) 0.003(3) -0.003(3) 
Cl3 0.0328(13) 0.0238(13) 0.0329(12) 0.0042(10) -0.0041(8) -0.0024(9) 
C21 0.028(5) 0.026(5) 0.016(4) 0.003(4) -0.005(3) 0.000(4) 
C22 0.030(5) 0.031(6) 0.016(4) 0.009(4) 0.008(3) 0.002(4) 
Cl4 0.0625(17) 0.0335(14) 0.0253(12) 0.0144(10) -0.0005(10) -0.0002(11) 
C23 0.018(5) 0.018(5) 0.026(5) 0.003(4) 0.003(3) 0.002(3) 
Ag2 0.0415(5) 0.0240(4) 0.0234(4) 0.0106(3) 0.0077(3) 0.0158(3) 
N31 0.030(4) 0.013(4) 0.014(4) 0.005(3) -0.002(3) 0.000(3) 
N32 0.018(4) 0.026(4) 0.018(4) 0.005(3) 0.002(3) 0.000(3) 
C32 0.014(4) 0.011(5) 0.015(4) 0.005(3) -0.005(3) -0.002(3) 
C33 0.029(5) 0.013(5) 0.023(5) 0.004(4) 0.001(3) -0.005(4) 
C34 0.029(5) 0.019(5) 0.024(5) 0.000(4) 0.002(3) 0.008(4) 
C35 0.016(5) 0.004(4) 0.024(4) 0.004(3) -0.002(3) -0.004(3) 
C36 0.022(5) 0.029(5) 0.011(4) -0.003(4) 0.003(3) 0.010(4) 
N33 0.021(4) 0.024(4) 0.014(4) 0.003(3) -0.002(2) 0.001(3) 
C38 0.024(5) 0.012(4) 0.017(4) 0.007(4) -0.002(3) 0.005(3) 
C39 0.016(4) 0.025(5) 0.013(4) 0.001(4) -0.002(3) 0.005(3) 
C40 0.018(5) 0.023(5) 0.016(4) 0.001(4) -0.004(3) -0.003(3) 
Cl5 0.0348(13) 0.0266(13) 0.0300(12) 0.0116(10) 0.0040(8) -0.0008(9) 
C41 0.020(5) 0.035(6) 0.017(4) 0.008(4) -0.003(3) 0.001(4) 
C42 0.018(5) 0.021(5) 0.027(5) 0.002(4) 0.001(3) 0.006(4) 
Cl6 0.0486(15) 0.0283(13) 0.0203(11) -0.0017(9) 0.0000(8) 0.0024(10) 
C43 0.026(5) 0.014(5) 0.021(4) 0.001(4) 0.001(3) 0.007(3) 
C46 0.013(4) 0.013(5) 0.028(5) 0.014(4) 0.007(3) 0.005(3) 
N34 0.021(4) 0.012(4) 0.014(3) 0.005(3) -0.001(2) 0.004(3) 
C48 0.021(5) 0.016(5) 0.023(5) 0.003(4) 0.000(3) 0.005(3) 
C49 0.015(5) 0.027(5) 0.022(5) 0.010(4) 0.001(3) 0.003(3) 
C50 0.021(5) 0.020(5) 0.026(5) 0.001(4) 0.004(3) 0.000(3) 
Cl7 0.0347(13) 0.0272(13) 0.0279(12) 0.0000(10) 0.0013(8) 0.0002(10) 
C51 0.020(5) 0.030(5) 0.018(4) 0.000(4) 0.000(3) -0.002(4) 
C52 0.034(5) 0.027(5) 0.021(5) 0.019(4) 0.008(3) -0.002(4) 
Cl8 0.0783(19) 0.0376(15) 0.0295(13) 0.0192(11) 0.0099(11) -0.0031(12) 
C53 0.022(5) 0.013(4) 0.028(5) 0.010(4) 0.005(3) -0.002(3) 
B1 0.028(7) 0.040(7) 0.040(7) 0.017(6) 0.006(5) 0.009(5) 
F11 0.049(4) 0.042(4) 0.100(4) 0.018(3) -0.040(3) -0.006(3) 
F12 0.062(4) 0.036(3) 0.037(3) 0.012(2) -0.002(2) 0.026(3) 
F13 0.030(3) 0.033(3) 0.046(3) 0.014(2) 0.008(2) -0.002(2) 
F14 0.077(5) 0.050(4) 0.085(4) 0.032(3) 0.057(3) 0.027(3) 
B2 0.027(6) 0.024(6) 0.046(7) 0.016(5) 0.001(5) 0.005(5) 
F21 0.047(4) 0.043(4) 0.074(4) 0.016(3) 0.037(3) -0.001(3) 
F22 0.052(4) 0.043(4) 0.070(4) 0.008(3) -0.030(3) 0.010(3) 
F23 0.020(3) 0.029(3) 0.045(3) 0.006(2) 0.0003(19) -0.001(2) 
F24 0.050(3) 0.033(3) 0.035(3) 0.002(2) 0.008(2) 0.017(2) 
C60 0.025(7) 0.040(8) 0.124(11) 0.022(8) 0.038(7) -0.006(5) 
C61 0.036(7) 0.076(10) 0.074(9) 0.015(8) 0.012(5) -0.029(7) 
C62 0.054(8) 0.042(8) 0.050(8) -0.020(6) 0.033(6) -0.027(6) 
C70 0.022(7) 0.050(8) 0.120(11) 0.016(9) -0.025(7) -0.015(5) 
C71 0.045(8) 0.050(9) 0.079(10) 0.045(7) -0.028(6) -0.027(6) 
C72 0.034(7) 0.096(12) 0.071(9) -0.002(9) 0.005(6) -0.040(7) 
C80 0.064(8) 0.051(7) 0.061(7) 0.007(6) 0.005(5) 0.003(6) 
N80 0.051(6) 0.023(5) 0.052(6) -0.009(4) -0.009(4) -0.013(4) 
O80 0.090(6) 0.019(4) 0.081(5) -0.001(4) -0.027(4) 0.008(4) 
O81 0.041(5) 0.046(5) 0.096(6) 0.000(4) 0.015(4) -0.002(4) 
C90 0.044(7) 0.072(8) 0.068(7) 0.038(6) 0.008(5) 0.016(6) 
N90 0.035(6) 0.044(6) 0.079(7) 0.040(5) 0.021(5) 0.009(5) 
O90 0.088(6) 0.052(5) 0.104(6) 0.060(5) 0.046(4) 0.024(4) 
O91 0.027(4) 0.054(5) 0.085(5) 0.041(4) 0.004(3) -0.004(3) 
 
_geom_special_details 
; 
 All esds (except the esd in the dihedral angle between two l.s. planes) 
 are estimated using the full covariance matrix.  The cell esds are taken 
 into account individually in the estimation of esds in distances, angles 
 and torsion angles; correlations between esds in cell parameters are only 
 used when they are defined by crystal symmetry.  An approximate (isotropic) 
 treatment of cell esds is used for estimating esds involving l.s. planes. 
; 
 
loop_ 
 _geom_bond_atom_site_label_1 
 _geom_bond_atom_site_label_2 
 _geom_bond_distance 
 _geom_bond_site_symmetry_2 
 _geom_bond_publ_flag 
Ag1 N2 2.301(6) 2_666 y 
Ag1 N3 2.328(6) . y
Ag1 N4 2.391(6) 2_666 y
Ag1 N1 2.399(6) . y
Ag1 C61 3.516(11) . y
Ag1 F11 3.760(5) . y
N1 N2 1.346(7) . ? 
N1 C5 1.349(8) . ? 
N2 C2 1.338(9) . ? 
N2 Ag1 2.301(6) 2_666 ? 
C2 C3 1.411(10) . ? 
C2 C16 1.480(10) . ? 
C3 C4 1.362(9) . ? 
C3 H3 0.9500 . ? 
C4 C5 1.409(10) . ? 
C4 H4 0.9500 . ? 
C5 C6 1.478(9) . ? 
C6 N3 1.289(9) . ? 
C6 H6 0.9500 . ? 
N3 C8 1.439(8) . ? 
C8 C9 1.385(9) . ? 
C8 C13 1.391(9) . ? 
C9 C10 1.398(9) . ? 
C9 H9 0.9500 . ? 
C10 C11 1.383(9) . ? 
C10 Cl1 1.771(7) . ? 
C11 C12 1.379(10) . ? 
C11 H11 0.9500 . ? 
C12 C13 1.408(9) . ? 
C12 Cl2 1.740(7) . ? 
C13 H13 0.9500 . ? 
C16 N4 1.283(9) . ? 
C16 H16 0.9500 . ? 
N4 C18 1.448(8) . ? 
N4 Ag1 2.391(6) 2_666 ? 
C18 C19 1.390(9) . ? 
C18 C23 1.402(10) . ? 
C19 C20 1.389(9) . ? 
C19 H19 0.9500 . ? 
C20 C21 1.374(10) . ? 
C20 Cl3 1.751(7) . ? 
C21 C22 1.373(10) . ? 
C21 H21 0.9500 . ? 
C22 C23 1.396(9) . ? 
C22 Cl4 1.754(8) . ? 
C23 H23 0.9500 . ? 
Ag2 N32 2.313(6) 2_677 y 
Ag2 N33 2.342(6) . y 
Ag2 N31 2.403(6) . y 
Ag2 N34 2.436(6) 2_677 y
Ag2 C71 3.233(11) . y 
Ag2 F21 3.757(5) . y
N31 N32 1.326(7) . ? 
N31 C35 1.350(9) . ? 
N32 C32 1.340(9) . ? 
N32 Ag2 2.313(6) 2_677 ? 
C32 C33 1.401(10) . ? 
C32 C46 1.473(9) . ? 
C33 C34 1.372(9) . ? 
C33 H33 0.9500 . ? 
C34 C35 1.402(10) . ? 
C34 H34 0.9500 . ? 
C35 C36 1.494(9) . ? 
C36 N33 1.280(9) . ? 
C36 H36 0.9500 . ? 
N33 C38 1.422(8) . ? 
C38 C43 1.393(9) . ? 
C38 C39 1.402(9) . ? 
C39 C40 1.400(9) . ? 
C39 H39 0.9500 . ? 
C40 C41 1.375(9) . ? 
C40 Cl5 1.751(7) . ? 
C41 C42 1.408(10) . ? 
C41 H41 0.9500 . ? 
C42 C43 1.382(9) . ? 
C42 Cl6 1.744(7) . ? 
C43 H43 0.9500 . ? 
C46 N34 1.275(8) . ? 
C46 H46 0.9500 . ? 
N34 C48 1.435(8) . ? 
N34 Ag2 2.436(6) 2_677 ? 
C48 C53 1.383(9) . ? 
C48 C49 1.383(9) . ? 
C49 C50 1.415(9) . ? 
C49 H49 0.9500 . ? 
C50 C51 1.395(10) . ? 
C50 Cl7 1.740(7) . ? 
C51 C52 1.390(10) . ? 
C51 H51 0.9500 . ? 
C52 C53 1.379(9) . ? 
C52 Cl8 1.762(7) . ? 
C53 H53 0.9500 . ? 
B1 F14 1.372(10) . ? 
B1 F12 1.383(11) . ? 
B1 F11 1.385(10) . ? 
B1 F13 1.403(10) . ? 
B2 F21 1.383(10) . ? 
B2 F22 1.393(11) . ? 
B2 F24 1.393(11) . ? 
B2 F23 1.405(10) . ? 
C60 C61 1.372(13) . ? 
C60 C62 1.390(15) 2_766 ? 
C60 H60 0.9500 . ? 
C61 C62 1.366(15) . ? 
C61 H61 0.9500 . ? 
C62 C60 1.390(15) 2_766 ? 
C62 H62 0.9500 . ? 
C70 C71 1.362(14) . ? 
C70 C72 1.424(16) 2_777 ? 
C70 H70 0.9500 . ? 
C71 C72 1.335(16) . ? 
C71 H71 0.9500 . ? 
C72 C70 1.424(15) 2_777 ? 
C72 H72 0.9500 . ? 
C80 N80 1.467(10) . ? 
C80 H80A 0.9800 . ? 
C80 H80B 0.9800 . ? 
C80 H80C 0.9800 . ? 
N80 O80 1.230(9) . ? 
N80 O81 1.242(9) . ? 
C90 N90 1.457(11) . ? 
C90 H90A 0.9800 . ? 
C90 H90B 0.9800 . ? 
C90 H90C 0.9800 . ? 
N90 O90 1.220(9) . ? 
N90 O91 1.259(10) . ? 
 
loop_ 
 _geom_angle_atom_site_label_1 
 _geom_angle_atom_site_label_2 
 _geom_angle_atom_site_label_3 
 _geom_angle 
 _geom_angle_site_symmetry_1 
 _geom_angle_site_symmetry_3 
 _geom_angle_publ_flag 
N2 Ag1 N3 161.4(2) 2_666 . y 
N2 Ag1 N4 71.3(2) 2_666 2_666 y 
N3 Ag1 N4 108.6(2) . 2_666 y 
N2 Ag1 N1 113.2(2) 2_666 . y 
N3 Ag1 N1 71.2(2) . . y 
N4 Ag1 N1 167.12(19) 2_666 . y
N2 Ag1 C61 87.3(3) 2_666 . ? 
N3 Ag1 C61 77.8(3) . . ?
N4 Ag1 C61 126.2(3) 2_666 . ?
N1 Ag1 C61 66.6(3) . . ? 
N2 Ag1 F11 136.32(17) 2_666 . ?
N3 Ag1 F11 61.93(17) . . ? 
N4 Ag1 F11 110.37(16) 2_666 . ? 
N1 Ag1 F11 57.68(15) . . ? 
C61 Ag1 F11 118.5(3) . . ? 
N2 N1 C5 120.3(6) . . ? 
N2 N1 Ag1 124.7(5) . . ? 
C5 N1 Ag1 113.4(5) . . ? 
C2 N2 N1 119.3(6) . . ? 
C2 N2 Ag1 116.8(5) . 2_666 ? 
N1 N2 Ag1 122.0(5) . 2_666 ? 
N2 C2 C3 121.8(7) . . ? 
N2 C2 C16 117.2(7) . . ? 
C3 C2 C16 120.9(7) . . ? 
C4 C3 C2 119.1(7) . . ? 
C4 C3 H3 120.5 . . ? 
C2 C3 H3 120.5 . . ? 
C3 C4 C5 116.8(7) . . ? 
C3 C4 H4 121.6 . . ? 
C5 C4 H4 121.6 . . ? 
N1 C5 C4 122.1(6) . . ? 
N1 C5 C6 117.4(7) . . ? 
C4 C5 C6 120.5(7) . . ? 
N3 C6 C5 119.5(7) . . ? 
N3 C6 H6 120.2 . . ? 
C5 C6 H6 120.2 . . ? 
C6 N3 C8 118.5(6) . . ? 
C6 N3 Ag1 115.9(5) . . ? 
C8 N3 Ag1 123.4(5) . . ? 
C9 C8 C13 122.5(6) . . ? 
C9 C8 N3 116.3(6) . . ? 
C13 C8 N3 121.1(6) . . ? 
C8 C9 C10 116.9(6) . . ? 
C8 C9 H9 121.6 . . ? 
C10 C9 H9 121.6 . . ? 
C11 C10 C9 123.4(7) . . ? 
C11 C10 Cl1 118.3(5) . . ? 
C9 C10 Cl1 118.4(5) . . ? 
C12 C11 C10 117.4(7) . . ? 
C12 C11 H11 121.3 . . ? 
C10 C11 H11 121.3 . . ? 
C11 C12 C13 122.2(7) . . ? 
C11 C12 Cl2 119.4(6) . . ? 
C13 C12 Cl2 118.3(6) . . ? 
C8 C13 C12 117.5(7) . . ? 
C8 C13 H13 121.3 . . ? 
C12 C13 H13 121.3 . . ? 
N4 C16 C2 119.7(8) . . ? 
N4 C16 H16 120.1 . . ? 
C2 C16 H16 120.1 . . ? 
C16 N4 C18 119.1(7) . . ? 
C16 N4 Ag1 114.4(5) . 2_666 ? 
C18 N4 Ag1 126.2(5) . 2_666 ? 
C19 C18 C23 121.2(6) . . ? 
C19 C18 N4 116.9(7) . . ? 
C23 C18 N4 121.8(6) . . ? 
C20 C19 C18 118.2(7) . . ? 
C20 C19 H19 120.9 . . ? 
C18 C19 H19 120.9 . . ? 
C21 C20 C19 121.9(7) . . ? 
C21 C20 Cl3 118.7(5) . . ? 
C19 C20 Cl3 119.4(6) . . ? 
C22 C21 C20 119.0(7) . . ? 
C22 C21 H21 120.5 . . ? 
C20 C21 H21 120.5 . . ? 
C21 C22 C23 121.7(7) . . ? 
C21 C22 Cl4 119.2(6) . . ? 
C23 C22 Cl4 119.1(6) . . ? 
C22 C23 C18 117.9(7) . . ? 
C22 C23 H23 121.0 . . ? 
C18 C23 H23 121.0 . . ? 
N32 Ag2 N33 170.0(2) 2_677 . y 
N32 Ag2 N31 112.6(2) 2_677 . y 
N33 Ag2 N31 71.7(2) . . y 
N32 Ag2 N34 71.2(2) 2_677 2_677 y
N33 Ag2 N34 108.1(2) . 2_677 y 
N31 Ag2 N34 159.26(19) . 2_677 y 
N32 Ag2 C71 96.4(4) 2_677 . ? 
N33 Ag2 C71 74.8(4) . . ? 
N31 Ag2 C71 83.9(2) . . ? 
N34 Ag2 C71 116.4(2) 2_677 . ? 
N32 Ag2 F21 55.68(16) 2_677 . ? 
N33 Ag2 F21 114.71(17) . . ? 
N31 Ag2 F21 135.80(16) . . ? 
N34 Ag2 F21 64.01(16) 2_677 . ? 
C71 Ag2 F21 58.8(3) . . ? 
N32 N31 C35 120.8(6) . . ? 
N32 N31 Ag2 123.9(5) . . ? 
C35 N31 Ag2 113.2(4) . . ? 
N31 N32 C32 119.8(6) . . ? 
N31 N32 Ag2 123.1(5) . 2_677 ? 
C32 N32 Ag2 116.2(5) . 2_677 ? 
N32 C32 C33 121.9(6) . . ? 
N32 C32 C46 117.5(7) . . ? 
C33 C32 C46 120.6(7) . . ? 
C34 C33 C32 117.9(7) . . ? 
C34 C33 H33 121.0 . . ? 
C32 C33 H33 121.0 . . ? 
C33 C34 C35 117.8(7) . . ? 
C33 C34 H34 121.1 . . ? 
C35 C34 H34 121.1 . . ? 
N31 C35 C34 121.2(6) . . ? 
N31 C35 C36 117.9(7) . . ? 
C34 C35 C36 120.6(7) . . ? 
N33 C36 C35 120.5(7) . . ? 
N33 C36 H36 119.7 . . ? 
C35 C36 H36 119.7 . . ? 
C36 N33 C38 118.9(6) . . ? 
C36 N33 Ag2 116.2(5) . . ? 
C38 N33 Ag2 124.5(5) . . ? 
C43 C38 C39 120.5(6) . . ? 
C43 C38 N33 122.9(6) . . ? 
C39 C38 N33 116.6(6) . . ? 
C40 C39 C38 118.6(6) . . ? 
C40 C39 H39 120.7 . . ? 
C38 C39 H39 120.7 . . ? 
C41 C40 C39 122.6(7) . . ? 
C41 C40 Cl5 118.2(5) . . ? 
C39 C40 Cl5 119.2(6) . . ? 
C40 C41 C42 116.9(7) . . ? 
C40 C41 H41 121.6 . . ? 
C42 C41 H41 121.6 . . ? 
C43 C42 C41 122.8(7) . . ? 
C43 C42 Cl6 118.7(6) . . ? 
C41 C42 Cl6 118.6(6) . . ? 
C42 C43 C38 118.6(7) . . ? 
C42 C43 H43 120.7 . . ? 
C38 C43 H43 120.7 . . ? 
N34 C46 C32 121.2(7) . . ? 
N34 C46 H46 119.4 . . ? 
C32 C46 H46 119.4 . . ? 
C46 N34 C48 119.4(6) . . ? 
C46 N34 Ag2 111.5(5) . 2_677 ? 
C48 N34 Ag2 127.2(4) . 2_677 ? 
C53 C48 C49 121.8(6) . . ? 
C53 C48 N34 123.2(6) . . ? 
C49 C48 N34 114.9(6) . . ? 
C48 C49 C50 118.0(7) . . ? 
C48 C49 H49 121.0 . . ? 
C50 C49 H49 121.0 . . ? 
C51 C50 C49 121.8(7) . . ? 
C51 C50 Cl7 118.5(5) . . ? 
C49 C50 Cl7 119.7(6) . . ? 
C52 C51 C50 116.7(6) . . ? 
C52 C51 H51 121.7 . . ? 
C50 C51 H51 121.7 . . ? 
C53 C52 C51 123.4(7) . . ? 
C53 C52 Cl8 118.8(6) . . ? 
C51 C52 Cl8 117.7(6) . . ? 
C52 C53 C48 118.2(7) . . ? 
C52 C53 H53 120.9 . . ? 
C48 C53 H53 120.9 . . ? 
F14 B1 F12 111.1(8) . . ? 
F14 B1 F11 110.7(9) . . ? 
F12 B1 F11 109.5(8) . . ? 
F14 B1 F13 107.7(8) . . ? 
F12 B1 F13 109.0(8) . . ? 
F11 B1 F13 108.7(7) . . ? 
B1 F11 Ag1 127.0(5) . . ? 
F21 B2 F22 109.5(8) . . ? 
F21 B2 F24 110.2(8) . . ? 
F22 B2 F24 110.9(8) . . ? 
F21 B2 F23 109.0(7) . . ? 
F22 B2 F23 108.0(7) . . ? 
F24 B2 F23 109.2(8) . . ? 
B2 F21 Ag2 123.5(5) . . ? 
C61 C60 C62 120.7(11) . 2_766 ? 
C61 C60 H60 119.6 . . ? 
C62 C60 H60 119.6 2_766 . ? 
C62 C61 C60 119.5(11) . . ? 
C62 C61 Ag1 114.6(8) . . ? 
C60 C61 Ag1 98.9(8) . . ? 
C62 C61 H61 120.2 . . ? 
C60 C61 H61 120.2 . . ? 
Ag1 C61 H61 55.5 . . ? 
C61 C62 C60 119.7(10) . 2_766 ? 
C61 C62 H62 120.1 . . ? 
C60 C62 H62 120.1 2_766 . ? 
C71 C70 C72 119.6(11) . 2_777 ? 
C71 C70 H70 120.2 . . ? 
C72 C70 H70 120.2 2_777 . ? 
C72 C71 C70 121.6(11) . . ? 
C72 C71 Ag2 108.4(7) . . ? 
C70 C71 Ag2 81.9(7) . . ? 
C72 C71 H71 119.2 . . ? 
C70 C71 H71 119.2 . . ? 
Ag2 C71 H71 79.7 . . ? 
C71 C72 C70 118.9(11) . 2_777 ? 
C71 C72 H72 120.6 . . ? 
C70 C72 H72 120.6 2_777 . ? 
N80 C80 H80A 109.5 . . ? 
N80 C80 H80B 109.5 . . ? 
H80A C80 H80B 109.5 . . ? 
N80 C80 H80C 109.5 . . ? 
H80A C80 H80C 109.5 . . ? 
H80B C80 H80C 109.5 . . ? 
O80 N80 O81 123.5(9) . . ? 
O80 N80 C80 117.8(9) . . ? 
O81 N80 C80 118.5(9) . . ? 
N90 C90 H90A 109.5 . . ? 
N90 C90 H90B 109.5 . . ? 
H90A C90 H90B 109.5 . . ? 
N90 C90 H90C 109.5 . . ? 
H90A C90 H90C 109.5 . . ? 
H90B C90 H90C 109.5 . . ? 
O90 N90 O91 122.8(10) . . ? 
O90 N90 C90 120.2(10) . . ? 
O91 N90 C90 117.0(9) . . ? 
 
loop_ 
 _geom_torsion_atom_site_label_1 
 _geom_torsion_atom_site_label_2 
 _geom_torsion_atom_site_label_3 
 _geom_torsion_atom_site_label_4 
 _geom_torsion 
 _geom_torsion_site_symmetry_1 
 _geom_torsion_site_symmetry_2 
 _geom_torsion_site_symmetry_3 
 _geom_torsion_site_symmetry_4 
 _geom_torsion_publ_flag 
N2 Ag1 N1 N2 1.3(6) 2_666 . . . ? 
N3 Ag1 N1 N2 161.9(5) . . . . ? 
N4 Ag1 N1 N2 -106.8(9) 2_666 . . . ? 
C61 Ag1 N1 N2 77.4(5) . . . . ? 
F11 Ag1 N1 N2 -130.0(5) . . . . ? 
N2 Ag1 N1 C5 -164.4(4) 2_666 . . . ? 
N3 Ag1 N1 C5 -3.8(4) . . . . ? 
N4 Ag1 N1 C5 87.6(10) 2_666 . . . ? 
C61 Ag1 N1 C5 -88.3(5) . . . . ? 
F11 Ag1 N1 C5 64.3(4) . . . . ? 
C5 N1 N2 C2 -1.0(9) . . . . ? 
Ag1 N1 N2 C2 -165.8(5) . . . . ? 
C5 N1 N2 Ag1 163.4(5) . . . 2_666 ? 
Ag1 N1 N2 Ag1 -1.4(6) . . . 2_666 ? 
N1 N2 C2 C3 -5.6(10) . . . . ? 
Ag1 N2 C2 C3 -170.7(5) 2_666 . . . ? 
N1 N2 C2 C16 170.4(5) . . . . ? 
Ag1 N2 C2 C16 5.2(8) 2_666 . . . ? 
N2 C2 C3 C4 5.4(10) . . . . ? 
C16 C2 C3 C4 -170.4(6) . . . . ? 
C2 C3 C4 C5 1.1(10) . . . . ? 
N2 N1 C5 C4 7.8(10) . . . . ? 
Ag1 N1 C5 C4 174.2(5) . . . . ? 
N2 N1 C5 C6 -170.1(5) . . . . ? 
Ag1 N1 C5 C6 -3.7(7) . . . . ? 
C3 C4 C5 N1 -7.6(10) . . . . ? 
C3 C4 C5 C6 170.2(6) . . . . ? 
N1 C5 C6 N3 15.4(9) . . . . ? 
C4 C5 C6 N3 -162.5(7) . . . . ? 
C5 C6 N3 C8 177.2(5) . . . . ? 
C5 C6 N3 Ag1 -18.8(8) . . . . ? 
N2 Ag1 N3 C6 119.1(7) 2_666 . . . ? 
N4 Ag1 N3 C6 -154.4(5) 2_666 . . . ? 
N1 Ag1 N3 C6 12.0(5) . . . . ? 
C61 Ag1 N3 C6 81.2(5) . . . . ? 
F11 Ag1 N3 C6 -50.7(5) . . . . ? 
N2 Ag1 N3 C8 -77.8(8) 2_666 . . . ? 
N4 Ag1 N3 C8 8.7(5) 2_666 . . . ? 
N1 Ag1 N3 C8 175.1(5) . . . . ? 
C61 Ag1 N3 C8 -115.7(5) . . . . ? 
F11 Ag1 N3 C8 112.4(5) . . . . ? 
C6 N3 C8 C9 -151.5(7) . . . . ? 
Ag1 N3 C8 C9 45.8(8) . . . . ? 
C6 N3 C8 C13 32.8(10) . . . . ? 
Ag1 N3 C8 C13 -129.9(6) . . . . ? 
C13 C8 C9 C10 -3.2(10) . . . . ? 
N3 C8 C9 C10 -178.9(6) . . . . ? 
C8 C9 C10 C11 0.5(11) . . . . ? 
C8 C9 C10 Cl1 179.7(5) . . . . ? 
C9 C10 C11 C12 1.7(11) . . . . ? 
Cl1 C10 C11 C12 -177.5(6) . . . . ? 
C10 C11 C12 C13 -1.5(11) . . . . ? 
C10 C11 C12 Cl2 178.4(6) . . . . ? 
C9 C8 C13 C12 3.4(10) . . . . ? 
N3 C8 C13 C12 178.9(6) . . . . ? 
C11 C12 C13 C8 -0.9(11) . . . . ? 
Cl2 C12 C13 C8 179.1(6) . . . . ? 
N2 C2 C16 N4 -9.1(10) . . . . ? 
C3 C2 C16 N4 166.9(6) . . . . ? 
C2 C16 N4 C18 -179.0(6) . . . . ? 
C2 C16 N4 Ag1 7.8(8) . . . 2_666 ? 
C16 N4 C18 C19 149.4(7) . . . . ? 
Ag1 N4 C18 C19 -38.3(8) 2_666 . . . ? 
C16 N4 C18 C23 -33.6(10) . . . . ? 
Ag1 N4 C18 C23 138.7(6) 2_666 . . . ? 
C23 C18 C19 C20 0.9(10) . . . . ? 
N4 C18 C19 C20 177.9(6) . . . . ? 
C18 C19 C20 C21 -0.9(11) . . . . ? 
C18 C19 C20 Cl3 -179.7(5) . . . . ? 
C19 C20 C21 C22 0.8(11) . . . . ? 
Cl3 C20 C21 C22 179.6(6) . . . . ? 
C20 C21 C22 C23 -0.7(11) . . . . ? 
C20 C21 C22 Cl4 179.9(6) . . . . ? 
C21 C22 C23 C18 0.7(11) . . . . ? 
Cl4 C22 C23 C18 -179.9(6) . . . . ? 
C19 C18 C23 C22 -0.8(10) . . . . ? 
N4 C18 C23 C22 -177.7(7) . . . . ? 
N32 Ag2 N31 N32 -6.1(6) 2_677 . . . ? 
N33 Ag2 N31 N32 164.3(5) . . . . ? 
N34 Ag2 N31 N32 -102.8(6) 2_677 . . . ? 
C71 Ag2 N31 N32 88.3(6) . . . . ? 
F21 Ag2 N31 N32 57.3(6) . . . . ? 
N32 Ag2 N31 C35 -169.8(5) 2_677 . . . ? 
N33 Ag2 N31 C35 0.6(5) . . . . ? 
N34 Ag2 N31 C35 93.5(7) 2_677 . . . ? 
C71 Ag2 N31 C35 -75.4(6) . . . . ? 
F21 Ag2 N31 C35 -106.4(5) . . . . ? 
C35 N31 N32 C32 0.3(9) . . . . ? 
Ag2 N31 N32 C32 -162.2(5) . . . . ? 
C35 N31 N32 Ag2 169.2(5) . . . 2_677 ? 
Ag2 N31 N32 Ag2 6.7(7) . . . 2_677 ? 
N31 N32 C32 C33 -7.0(10) . . . . ? 
Ag2 N32 C32 C33 -176.7(5) 2_677 . . . ? 
N31 N32 C32 C46 171.2(5) . . . . ? 
Ag2 N32 C32 C46 1.5(8) 2_677 . . . ? 
N32 C32 C33 C34 8.4(10) . . . . ? 
C46 C32 C33 C34 -169.8(6) . . . . ? 
C32 C33 C34 C35 -3.1(10) . . . . ? 
N32 N31 C35 C34 4.8(10) . . . . ? 
Ag2 N31 C35 C34 169.1(5) . . . . ? 
N32 N31 C35 C36 -168.4(5) . . . . ? 
Ag2 N31 C35 C36 -4.1(8) . . . . ? 
C33 C34 C35 N31 -3.2(10) . . . . ? 
C33 C34 C35 C36 169.8(6) . . . . ? 
N31 C35 C36 N33 7.8(10) . . . . ? 
C34 C35 C36 N33 -165.4(7) . . . . ? 
C35 C36 N33 C38 179.6(6) . . . . ? 
C35 C36 N33 Ag2 -7.1(8) . . . . ? 
N32 Ag2 N33 C36 120.9(12) 2_677 . . . ? 
N31 Ag2 N33 C36 3.5(5) . . . . ? 
N34 Ag2 N33 C36 -154.7(5) 2_677 . . . ? 
C71 Ag2 N33 C36 92.0(5) . . . . ? 
F21 Ag2 N33 C36 136.2(5) . . . . ? 
N32 Ag2 N33 C38 -66.3(14) 2_677 . . . ? 
N31 Ag2 N33 C38 176.4(5) . . . . ? 
N34 Ag2 N33 C38 18.2(5) 2_677 . . . ? 
C71 Ag2 N33 C38 -95.1(5) . . . . ? 
F21 Ag2 N33 C38 -50.9(5) . . . . ? 
C36 N33 C38 C43 29.8(10) . . . . ? 
Ag2 N33 C38 C43 -142.9(6) . . . . ? 
C36 N33 C38 C39 -151.9(7) . . . . ? 
Ag2 N33 C38 C39 35.4(8) . . . . ? 
C43 C38 C39 C40 -0.7(10) . . . . ? 
N33 C38 C39 C40 -179.0(6) . . . . ? 
C38 C39 C40 C41 -1.0(10) . . . . ? 
C38 C39 C40 Cl5 179.6(6) . . . . ? 
C39 C40 C41 C42 1.7(10) . . . . ? 
Cl5 C40 C41 C42 -179.0(6) . . . . ? 
C40 C41 C42 C43 -0.7(11) . . . . ? 
C40 C41 C42 Cl6 178.9(5) . . . . ? 
C41 C42 C43 C38 -1.0(11) . . . . ? 
Cl6 C42 C43 C38 179.4(5) . . . . ? 
C39 C38 C43 C42 1.7(10) . . . . ? 
N33 C38 C43 C42 179.9(7) . . . . ? 
N32 C32 C46 N34 -14.1(9) . . . . ? 
C33 C32 C46 N34 164.1(7) . . . . ? 
C32 C46 N34 C48 -176.7(6) . . . . ? 
C32 C46 N34 Ag2 17.8(7) . . . 2_677 ? 
C46 N34 C48 C53 -29.3(10) . . . . ? 
Ag2 N34 C48 C53 133.8(6) 2_677 . . . ? 
C46 N34 C48 C49 153.7(6) . . . . ? 
Ag2 N34 C48 C49 -43.2(8) 2_677 . . . ? 
C53 C48 C49 C50 2.2(10) . . . . ? 
N34 C48 C49 C50 179.2(6) . . . . ? 
C48 C49 C50 C51 0.2(10) . . . . ? 
C48 C49 C50 Cl7 -177.6(5) . . . . ? 
C49 C50 C51 C52 -0.1(10) . . . . ? 
Cl7 C50 C51 C52 177.7(6) . . . . ? 
C50 C51 C52 C53 -2.4(11) . . . . ? 
C50 C51 C52 Cl8 -179.6(6) . . . . ? 
C51 C52 C53 C48 4.7(11) . . . . ? 
Cl8 C52 C53 C48 -178.1(6) . . . . ? 
C49 C48 C53 C52 -4.6(11) . . . . ? 
N34 C48 C53 C52 178.7(6) . . . . ? 
F14 B1 F11 Ag1 84.8(9) . . . . ? 
F12 B1 F11 Ag1 -38.2(10) . . . . ? 
F13 B1 F11 Ag1 -157.1(5) . . . . ? 
N2 Ag1 F11 B1 111.7(7) 2_666 . . . ? 
N3 Ag1 F11 B1 -73.0(7) . . . . ? 
N4 Ag1 F11 B1 27.8(7) 2_666 . . . ? 
N1 Ag1 F11 B1 -157.6(8) . . . . ? 
C61 Ag1 F11 B1 -128.9(7) . . . . ? 
F22 B2 F21 Ag2 81.7(8) . . . . ? 
F24 B2 F21 Ag2 -40.5(9) . . . . ? 
F23 B2 F21 Ag2 -160.3(5) . . . . ? 
N32 Ag2 F21 B2 -152.6(7) 2_677 . . . ? 
N33 Ag2 F21 B2 30.6(7) . . . . ? 
N31 Ag2 F21 B2 119.4(7) . . . . ? 
N34 Ag2 F21 B2 -68.3(6) 2_677 . . . ? 
C71 Ag2 F21 B2 82.6(7) . . . . ? 
C62 C60 C61 C62 1.4(15) 2_766 . . . ? 
C62 C60 C61 Ag1 126.3(7) 2_766 . . . ? 
N2 Ag1 C61 C62 150.6(9) 2_666 . . . ? 
N3 Ag1 C61 C62 -40.7(9) . . . . ? 
N4 Ag1 C61 C62 -144.9(8) 2_666 . . . ? 
N1 Ag1 C61 C62 33.9(8) . . . . ? 
F11 Ag1 C61 C62 7.7(10) . . . . ? 
N2 Ag1 C61 C60 22.3(8) 2_666 . . . ? 
N3 Ag1 C61 C60 -169.0(9) . . . . ? 
N4 Ag1 C61 C60 86.7(8) 2_666 . . . ? 
N1 Ag1 C61 C60 -94.4(8) . . . . ? 
F11 Ag1 C61 C60 -120.6(8) . . . . ? 
C60 C61 C62 C60 -1.4(14) . . . 2_766 ? 
Ag1 C61 C62 C60 -118.4(9) . . . 2_766 ? 
C72 C70 C71 C72 -0.5(17) 2_777 . . . ? 
C72 C70 C71 Ag2 106.1(8) 2_777 . . . ? 
N32 Ag2 C71 C72 158.7(11) 2_677 . . . ? 
N33 Ag2 C71 C72 -26.1(11) . . . . ? 
N31 Ag2 C71 C72 46.6(11) . . . . ? 
N34 Ag2 C71 C72 -129.1(10) 2_677 . . . ? 
F21 Ag2 C71 C72 -158.3(12) . . . . ? 
N32 Ag2 C71 C70 38.1(8) 2_677 . . . ? 
N33 Ag2 C71 C70 -146.8(9) . . . . ? 
N31 Ag2 C71 C70 -74.1(8) . . . . ? 
N34 Ag2 C71 C70 110.3(8) 2_677 . . . ? 
F21 Ag2 C71 C70 81.1(9) . . . . ? 
C70 C71 C72 C70 0.5(16) . . . 2_777 ? 
Ag2 C71 C72 C70 -91.1(10) . . . 2_777 ? 
 
_diffrn_measured_fraction_theta_max    0.950 
_diffrn_reflns_theta_full              26.41 
_diffrn_measured_fraction_theta_full   0.950 
_refine_diff_density_max    0.964 
_refine_diff_density_min   -1.158 
_refine_diff_density_rms    0.163 


#===END

 
data_jrp79c 
 
_audit_creation_method            SHELXL-97 
_chemical_name_systematic 
; 
 ? 
; 
_chemical_name_common             ? 
_chemical_melting_point           ? 
_chemical_formula_moiety          ? 
_chemical_formula_sum 
 'C45 H47 Ag2 B2 F8 N9 O2' 
_chemical_formula_weight          1135.28 
 
loop_ 
 _atom_type_symbol 
 _atom_type_description 
 _atom_type_scat_dispersion_real 
 _atom_type_scat_dispersion_imag 
 _atom_type_scat_source 
 'C'  'C'   0.0033   0.0016 
 'International Tables Vol C Tables 4.2.6.8 and 6.1.1.4' 
 'H'  'H'   0.0000   0.0000 
 'International Tables Vol C Tables 4.2.6.8 and 6.1.1.4' 
 'B'  'B'   0.0013   0.0007 
 'International Tables Vol C Tables 4.2.6.8 and 6.1.1.4' 
 'N'  'N'   0.0061   0.0033 
 'International Tables Vol C Tables 4.2.6.8 and 6.1.1.4' 
 'O'  'O'   0.0106   0.0060 
 'International Tables Vol C Tables 4.2.6.8 and 6.1.1.4' 
 'F'  'F'   0.0171   0.0103 
 'International Tables Vol C Tables 4.2.6.8 and 6.1.1.4' 
 'Ag'  'Ag'  -0.8971   1.1015 
 'International Tables Vol C Tables 4.2.6.8 and 6.1.1.4' 
 
_symmetry_cell_setting            Monoclinic 
_symmetry_space_group_name_H-M    C2/c
 
loop_ 
 _symmetry_equiv_pos_as_xyz 
 'x, y, z' 
 '-x, y, -z+1/2' 
 'x+1/2, y+1/2, z' 
 '-x+1/2, y+1/2, -z+1/2' 
 '-x, -y, -z' 
 'x, -y, z-1/2' 
 '-x+1/2, -y+1/2, -z' 
 'x+1/2, -y+1/2, z-1/2' 
 
_cell_length_a                    26.757(18) 
_cell_length_b                    11.094(7) 
_cell_length_c                    15.482(11) 
_cell_angle_alpha                 90.00 
_cell_angle_beta                  91.942(6) 
_cell_angle_gamma                 90.00 
_cell_volume                      4593(5) 
_cell_formula_units_Z             4 
_cell_measurement_temperature     101(2) 
_cell_measurement_reflns_used     ? 
_cell_measurement_theta_min       ? 
_cell_measurement_theta_max       ? 
 
_exptl_crystal_description        needle 
_exptl_crystal_colour             orange
_exptl_crystal_size_max           0.75
_exptl_crystal_size_mid           0.12
_exptl_crystal_size_min           0.10
_exptl_crystal_density_meas       ? 
_exptl_crystal_density_diffrn     1.642 
_exptl_crystal_density_method     'not measured' 
_exptl_crystal_F_000              2288 
_exptl_absorpt_coefficient_mu     0.935 
_exptl_absorpt_correction_type    'multi-scan' 
_exptl_absorpt_correction_T_min   0.825
_exptl_absorpt_correction_T_max   1.000 
_exptl_absorpt_process_details    'SADABS (Bruker AXS Inc., 2000)'
 
_exptl_special_details 
; 
 ? 
; 
 
_diffrn_ambient_temperature       101(2) 
_diffrn_radiation_wavelength      0.71073 
_diffrn_radiation_type            MoK\a 
_diffrn_radiation_source          'fine-focus sealed tube' 
_diffrn_radiation_monochromator   graphite 
_diffrn_measurement_device_type   'Bruker SMART area detector' 
_diffrn_measurement_method        'CCD area detector'
_diffrn_detector_area_resol_mean  ? 
_diffrn_standards_number          ? 
_diffrn_standards_interval_count  ? 
_diffrn_standards_interval_time   ? 
_diffrn_standards_decay_%         ? 
_diffrn_reflns_number             19287 
_diffrn_reflns_av_R_equivalents   0.0402 
_diffrn_reflns_av_sigmaI/netI     0.0361 
_diffrn_reflns_limit_h_min        -31 
_diffrn_reflns_limit_h_max        33 
_diffrn_reflns_limit_k_min        -13 
_diffrn_reflns_limit_k_max        13 
_diffrn_reflns_limit_l_min        -19 
_diffrn_reflns_limit_l_max        19 
_diffrn_reflns_theta_min          1.99 
_diffrn_reflns_theta_max          26.40 
_reflns_number_total              4679 
_reflns_number_gt                 3820 
_reflns_threshold_expression      >2sigma(I) 
 
_computing_data_collection        ? 
_computing_cell_refinement        ? 
_computing_data_reduction         ? 
_computing_structure_solution     'SHELXS-97 (Sheldrick, 1990)' 
_computing_structure_refinement   'SHELXL-97 (Sheldrick, 1997)' 
_computing_molecular_graphics     ? 
_computing_publication_material   ? 
 
_refine_special_details 
; 
 Refinement of F^2^ against ALL reflections.  The weighted R-factor wR and 
 goodness of fit S are based on F^2^, conventional R-factors R are based 
 on F, with F set to zero for negative F^2^. The threshold expression of 
 F^2^ > 2sigma(F^2^) is used only for calculating R-factors(gt) etc. and is 
 not relevant to the choice of reflections for refinement.  R-factors based 
 on F^2^ are statistically about twice as large as those based on F, and R- 
 factors based on ALL data will be even larger.

 All non-H ANIS. No disorder. All H calc and ride. NO2Me on special position.
; 
 
_refine_ls_structure_factor_coef  Fsqd  
_refine_ls_matrix_type            full 
_refine_ls_weighting_scheme       calc  
_refine_ls_weighting_details 
 'calc w=1/[\s^2^(Fo^2^)+(0.0290P)^2^+3.6402P] where P=(Fo^2^+2Fc^2^)/3' 
_atom_sites_solution_primary      direct 
_atom_sites_solution_secondary    difmap 
_atom_sites_solution_hydrogens    geom 
_refine_ls_hydrogen_treatment     mixed 
_refine_ls_extinction_method      none 
_refine_ls_extinction_coef        ? 
_refine_ls_number_reflns          4679 
_refine_ls_number_parameters      313 
_refine_ls_number_restraints      0 
_refine_ls_R_factor_all           0.0404 
_refine_ls_R_factor_gt            0.0267 
_refine_ls_wR_factor_ref          0.0613 
_refine_ls_wR_factor_gt           0.0574 
_refine_ls_goodness_of_fit_ref    1.024 
_refine_ls_restrained_S_all       1.024 
_refine_ls_shift/su_max           0.001 
_refine_ls_shift/su_mean          0.000 
 
loop_ 
 _atom_site_label 
 _atom_site_type_symbol 
 _atom_site_fract_x 
 _atom_site_fract_y 
 _atom_site_fract_z 
 _atom_site_U_iso_or_equiv 
 _atom_site_adp_type 
 _atom_site_occupancy 
 _atom_site_symmetry_multiplicity 
 _atom_site_calc_flag 
 _atom_site_refinement_flags 
 _atom_site_disorder_assembly 
 _atom_site_disorder_group 
Ag1 Ag 0.560936(7) 0.538415(16) -0.076518(10) 0.01767(6) Uani 1 1 d . . . 
N1 N 0.49091(7) 0.67163(17) -0.03318(11) 0.0159(4) Uani 1 1 d . . . 
N2 N 0.45620(7) 0.65327(17) 0.02601(11) 0.0154(4) Uani 1 1 d . . . 
C2 C 0.42340(8) 0.7413(2) 0.04371(13) 0.0152(5) Uani 1 1 d . . . 
C3 C 0.42582(9) 0.8564(2) 0.00632(14) 0.0178(5) Uani 1 1 d . . . 
H3 H 0.4044 0.9196 0.0236 0.021 Uiso 1 1 calc R . . 
C4 C 0.46039(9) 0.8743(2) -0.05646(14) 0.0180(5) Uani 1 1 d . . . 
H4 H 0.4630 0.9494 -0.0854 0.022 Uiso 1 1 calc R . . 
C5 C 0.49153(8) 0.7770(2) -0.07590(13) 0.0152(5) Uani 1 1 d . . . 
C6 C 0.52697(8) 0.7881(2) -0.14650(13) 0.0163(5) Uani 1 1 d . . . 
H6 H 0.5299 0.8636 -0.1747 0.020 Uiso 1 1 calc R . . 
N3 N 0.55398(7) 0.69985(17) -0.17132(11) 0.0152(4) Uani 1 1 d . . . 
C8 C 0.58895(8) 0.7220(2) -0.23792(13) 0.0158(5) Uani 1 1 d . . . 
C9 C 0.59672(8) 0.6317(2) -0.29975(13) 0.0158(5) Uani 1 1 d . . . 
C31 C 0.56587(9) 0.5176(2) -0.30312(14) 0.0178(5) Uani 1 1 d . . . 
H31A H 0.5782 0.4643 -0.3481 0.021 Uiso 1 1 calc R . . 
H31B H 0.5308 0.5379 -0.3163 0.021 Uiso 1 1 calc R . . 
H31C H 0.5686 0.4767 -0.2471 0.021 Uiso 1 1 calc R . . 
C10 C 0.63323(9) 0.6535(2) -0.36099(14) 0.0189(5) Uani 1 1 d . . . 
H10 H 0.6395 0.5931 -0.4027 0.023 Uiso 1 1 calc R . . 
C11 C 0.66053(9) 0.7603(2) -0.36280(14) 0.0206(5) Uani 1 1 d . . . 
C32 C 0.70075(10) 0.7814(3) -0.42796(16) 0.0316(6) Uani 1 1 d . . . 
H32A H 0.7012 0.7137 -0.4686 0.038 Uiso 1 1 calc R . . 
H32B H 0.7334 0.7879 -0.3976 0.038 Uiso 1 1 calc R . . 
H32C H 0.6936 0.8561 -0.4598 0.038 Uiso 1 1 calc R . . 
C12 C 0.65079(9) 0.8497(2) -0.30216(15) 0.0245(6) Uani 1 1 d . . . 
H12 H 0.6683 0.9242 -0.3038 0.029 Uiso 1 1 calc R . . 
C13 C 0.61570(9) 0.8306(2) -0.23940(14) 0.0203(5) Uani 1 1 d . . . 
H13 H 0.6099 0.8911 -0.1975 0.024 Uiso 1 1 calc R . . 
C16 C 0.38321(9) 0.7111(2) 0.10313(14) 0.0178(5) Uani 1 1 d . . . 
H16 H 0.3662 0.7742 0.1314 0.021 Uiso 1 1 calc R . . 
N4 N 0.37082(7) 0.60129(18) 0.11723(11) 0.0164(4) Uani 1 1 d . . . 
C18 C 0.33236(8) 0.5765(2) 0.17712(14) 0.0165(5) Uani 1 1 d . . . 
C19 C 0.30051(9) 0.4778(2) 0.16125(15) 0.0203(5) Uani 1 1 d . . . 
C41 C 0.30483(10) 0.3994(3) 0.08162(16) 0.0286(6) Uani 1 1 d . . . 
H41A H 0.3347 0.3487 0.0879 0.034 Uiso 1 1 calc R . . 
H41B H 0.3074 0.4507 0.0304 0.034 Uiso 1 1 calc R . . 
H41C H 0.2751 0.3481 0.0751 0.034 Uiso 1 1 calc R . . 
C20 C 0.26403(9) 0.4532(2) 0.22170(15) 0.0232(5) Uani 1 1 d . . . 
H20 H 0.2417 0.3878 0.2111 0.028 Uiso 1 1 calc R . . 
C21 C 0.25931(9) 0.5211(2) 0.29679(15) 0.0231(6) Uani 1 1 d . . . 
C42 C 0.21995(10) 0.4898(3) 0.36189(17) 0.0319(6) Uani 1 1 d . . . 
H42A H 0.1958 0.4331 0.3357 0.038 Uiso 1 1 calc R . . 
H42B H 0.2026 0.5634 0.3789 0.038 Uiso 1 1 calc R . . 
H42C H 0.2362 0.4528 0.4130 0.038 Uiso 1 1 calc R . . 
C22 C 0.29189(9) 0.6176(2) 0.31180(15) 0.0216(5) Uani 1 1 d . . . 
H22 H 0.2894 0.6642 0.3630 0.026 Uiso 1 1 calc R . . 
C23 C 0.32805(9) 0.6461(2) 0.25227(14) 0.0184(5) Uani 1 1 d . . . 
H23 H 0.3498 0.7127 0.2626 0.022 Uiso 1 1 calc R . . 
B1 B 0.60471(12) 0.8135(3) 0.05726(17) 0.0247(6) Uani 1 1 d . . . 
F11 F 0.60554(5) 0.68849(13) 0.04455(9) 0.0253(3) Uani 1 1 d . . . 
F12 F 0.60221(7) 0.87241(14) -0.02223(9) 0.0367(4) Uani 1 1 d . . . 
F13 F 0.56103(8) 0.84227(17) 0.10080(12) 0.0566(5) Uani 1 1 d . . . 
F14 F 0.64623(7) 0.85043(16) 0.10459(12) 0.0555(6) Uani 1 1 d . . . 
C50 C 0.5000 0.2604(3) -0.2500 0.0328(9) Uani 1 2 d S . . 
H50A H 0.4813 0.2898 -0.3013 0.039 Uiso 0.50 1 calc PR . . 
H50B H 0.5345 0.2898 -0.2509 0.039 Uiso 0.50 1 calc PR . . 
H50C H 0.4842 0.2898 -0.1978 0.039 Uiso 0.50 1 calc PR . . 
N50 N 0.5000 0.1284(3) -0.2500 0.0341(8) Uani 1 2 d S . . 
O50 O 0.53291(10) 0.0775(2) -0.20736(15) 0.0619(7) Uani 1 1 d . . . 
 
loop_ 
 _atom_site_aniso_label 
 _atom_site_aniso_U_11 
 _atom_site_aniso_U_22 
 _atom_site_aniso_U_33 
 _atom_site_aniso_U_23 
 _atom_site_aniso_U_13 
 _atom_site_aniso_U_12 
Ag1 0.02023(10) 0.01488(10) 0.01813(9) 0.00333(7) 0.00416(6) 0.00375(8) 
N1 0.0171(11) 0.0168(10) 0.0141(9) 0.0011(7) 0.0028(7) 0.0000(8) 
N2 0.0153(10) 0.0161(10) 0.0150(9) -0.0002(7) 0.0032(7) 0.0009(8) 
C2 0.0159(12) 0.0150(12) 0.0146(10) -0.0017(9) -0.0009(8) 0.0006(10) 
C3 0.0178(13) 0.0137(12) 0.0220(11) -0.0006(9) 0.0020(9) 0.0040(10) 
C4 0.0217(13) 0.0131(12) 0.0191(11) 0.0005(9) -0.0002(9) -0.0026(10) 
C5 0.0130(12) 0.0164(12) 0.0163(10) -0.0016(9) 0.0000(8) -0.0006(9) 
C6 0.0196(13) 0.0133(12) 0.0161(10) 0.0019(9) -0.0007(9) -0.0011(10) 
N3 0.0149(10) 0.0167(10) 0.0141(9) 0.0000(7) 0.0009(7) -0.0015(8) 
C8 0.0128(12) 0.0197(12) 0.0150(10) 0.0037(9) 0.0012(8) -0.0004(10) 
C9 0.0124(12) 0.0188(12) 0.0161(10) 0.0033(9) -0.0012(8) 0.0031(10) 
C31 0.0187(13) 0.0177(13) 0.0168(10) 0.0010(9) 0.0007(9) 0.0016(10) 
C10 0.0166(13) 0.0243(14) 0.0158(11) 0.0008(9) 0.0002(9) 0.0049(10) 
C11 0.0130(12) 0.0316(15) 0.0173(11) 0.0042(10) 0.0018(9) -0.0019(11) 
C32 0.0247(15) 0.0458(18) 0.0247(13) 0.0028(12) 0.0080(10) -0.0069(13) 
C12 0.0218(14) 0.0271(15) 0.0246(12) 0.0030(10) 0.0004(10) -0.0106(11) 
C13 0.0211(13) 0.0208(13) 0.0191(11) -0.0014(9) 0.0022(9) -0.0037(11) 
C16 0.0176(13) 0.0198(13) 0.0160(11) -0.0001(9) 0.0011(8) 0.0042(10) 
N4 0.0128(10) 0.0193(11) 0.0172(9) 0.0002(8) 0.0001(7) 0.0014(8) 
C18 0.0116(12) 0.0186(12) 0.0194(11) 0.0040(9) 0.0026(8) 0.0039(9) 
C19 0.0184(13) 0.0205(14) 0.0221(11) 0.0032(10) 0.0001(9) 0.0033(11) 
C41 0.0286(15) 0.0282(15) 0.0293(13) -0.0038(11) 0.0029(11) -0.0059(12) 
C20 0.0182(13) 0.0236(14) 0.0277(12) 0.0045(11) 0.0004(9) -0.0017(11) 
C21 0.0166(13) 0.0302(15) 0.0227(12) 0.0083(10) 0.0034(9) 0.0061(11) 
C42 0.0250(15) 0.0394(17) 0.0316(14) 0.0094(12) 0.0065(11) -0.0010(13) 
C22 0.0217(14) 0.0236(14) 0.0197(11) 0.0018(10) 0.0043(9) 0.0063(11) 
C23 0.0169(13) 0.0169(13) 0.0215(11) 0.0020(9) 0.0000(9) 0.0022(10) 
B1 0.0354(18) 0.0177(15) 0.0210(14) -0.0006(11) 0.0006(11) 0.0014(13) 
F11 0.0324(9) 0.0153(7) 0.0282(7) 0.0006(6) 0.0006(6) 0.0004(6) 
F12 0.0629(12) 0.0210(8) 0.0258(8) 0.0037(6) -0.0055(7) -0.0014(8) 
F13 0.0748(14) 0.0376(11) 0.0597(12) 0.0004(9) 0.0365(10) 0.0171(10) 
F14 0.0701(14) 0.0307(10) 0.0627(12) 0.0055(9) -0.0402(10) -0.0118(9) 
C50 0.054(3) 0.0114(18) 0.033(2) 0.000 -0.0075(18) 0.000 
N50 0.052(2) 0.0189(17) 0.0326(17) 0.000 0.0212(16) 0.000 
O50 0.0837(19) 0.0464(15) 0.0571(15) 0.0290(12) 0.0265(13) 0.0392(14) 
 
_geom_special_details 
; 
 All esds (except the esd in the dihedral angle between two l.s. planes) 
 are estimated using the full covariance matrix.  The cell esds are taken 
 into account individually in the estimation of esds in distances, angles 
 and torsion angles; correlations between esds in cell parameters are only 
 used when they are defined by crystal symmetry.  An approximate (isotropic) 
 treatment of cell esds is used for estimating esds involving l.s. planes. 
; 
 
loop_ 
 _geom_bond_atom_site_label_1 
 _geom_bond_atom_site_label_2 
 _geom_bond_distance 
 _geom_bond_site_symmetry_2 
 _geom_bond_publ_flag 
Ag1 N2 2.317(2) 5_665 y 
Ag1 N3 2.319(2) . y 
Ag1 N4 2.492(2) 5_665 y
Ag1 N1 2.496(2) . y 
Ag1 F11 2.7493(18) . y
N1 N2 1.342(3) . ? 
N1 C5 1.343(3) . ? 
N2 C2 1.347(3) . ? 
N2 Ag1 2.317(2) 5_665 ? 
C2 C3 1.404(3) . ? 
C2 C16 1.477(3) . ? 
C3 C4 1.379(3) . ? 
C3 H3 0.9500 . ? 
C4 C5 1.403(3) . ? 
C4 H4 0.9500 . ? 
C5 C6 1.476(3) . ? 
C6 N3 1.283(3) . ? 
C6 H6 0.9500 . ? 
N3 C8 1.437(3) . ? 
C8 C13 1.402(3) . ? 
C8 C9 1.406(3) . ? 
C9 C10 1.405(3) . ? 
C9 C31 1.511(3) . ? 
C31 H31A 0.9800 . ? 
C31 H31B 0.9800 . ? 
C31 H31C 0.9800 . ? 
C10 C11 1.393(4) . ? 
C10 H10 0.9500 . ? 
C11 C12 1.396(4) . ? 
C11 C32 1.518(3) . ? 
C32 H32A 0.9800 . ? 
C32 H32B 0.9800 . ? 
C32 H32C 0.9800 . ? 
C12 C13 1.390(3) . ? 
C12 H12 0.9500 . ? 
C13 H13 0.9500 . ? 
C16 N4 1.284(3) . ? 
C16 H16 0.9500 . ? 
N4 C18 1.435(3) . ? 
N4 Ag1 2.492(2) 5_665 ? 
C18 C19 1.404(3) . ? 
C18 C23 1.404(3) . ? 
C19 C20 1.402(3) . ? 
C19 C41 1.517(3) . ? 
C41 H41A 0.9800 . ? 
C41 H41B 0.9800 . ? 
C41 H41C 0.9800 . ? 
C20 C21 1.395(4) . ? 
C20 H20 0.9500 . ? 
C21 C22 1.395(4) . ? 
C21 C42 1.522(3) . ? 
C42 H42A 0.9800 . ? 
C42 H42B 0.9800 . ? 
C42 H42C 0.9800 . ? 
C22 C23 1.395(3) . ? 
C22 H22 0.9500 . ? 
C23 H23 0.9500 . ? 
B1 F14 1.372(3) . ? 
B1 F12 1.393(3) . ? 
B1 F11 1.401(3) . ? 
B1 F13 1.406(4) . ? 
C50 N50 1.464(5) . ? 
C50 H50A 0.9800 . ? 
C50 H50B 0.9800 . ? 
C50 H50C 0.9800 . ? 
N50 O50 1.221(3) 2_654 ? 
N50 O50 1.221(3) . ? 
 
loop_ 
 _geom_angle_atom_site_label_1 
 _geom_angle_atom_site_label_2 
 _geom_angle_atom_site_label_3 
 _geom_angle 
 _geom_angle_site_symmetry_1 
 _geom_angle_site_symmetry_3 
 _geom_angle_publ_flag 
N2 Ag1 N3 155.49(6) 5_665 . y 
N2 Ag1 N4 70.71(7) 5_665 5_665 y 
N3 Ag1 N4 111.34(7) . 5_665 y
N2 Ag1 N1 107.09(7) 5_665 . y 
N3 Ag1 N1 70.61(7) . . y
N4 Ag1 N1 177.79(6) 5_665 . y
N2 Ag1 F11 114.33(7) 5_665 . y 
N3 Ag1 F11 89.28(7) . . y 
N4 Ag1 F11 104.13(6) 5_665 . y
N1 Ag1 F11 76.74(7) . . y 
N2 N1 C5 119.24(19) . . ? 
N2 N1 Ag1 129.56(14) . . ? 
C5 N1 Ag1 111.15(15) . . ? 
N1 N2 C2 119.96(19) . . ? 
N1 N2 Ag1 121.27(14) . 5_665 ? 
C2 N2 Ag1 117.32(15) . 5_665 ? 
N2 C2 C3 122.4(2) . . ? 
N2 C2 C16 117.1(2) . . ? 
C3 C2 C16 120.5(2) . . ? 
C4 C3 C2 117.6(2) . . ? 
C4 C3 H3 121.2 . . ? 
C2 C3 H3 121.2 . . ? 
C3 C4 C5 117.3(2) . . ? 
C3 C4 H4 121.4 . . ? 
C5 C4 H4 121.4 . . ? 
N1 C5 C4 123.1(2) . . ? 
N1 C5 C6 117.1(2) . . ? 
C4 C5 C6 119.7(2) . . ? 
N3 C6 C5 122.7(2) . . ? 
N3 C6 H6 118.6 . . ? 
C5 C6 H6 118.6 . . ? 
C6 N3 C8 118.1(2) . . ? 
C6 N3 Ag1 115.68(15) . . ? 
C8 N3 Ag1 123.11(14) . . ? 
C13 C8 C9 120.9(2) . . ? 
C13 C8 N3 120.3(2) . . ? 
C9 C8 N3 118.8(2) . . ? 
C10 C9 C8 117.3(2) . . ? 
C10 C9 C31 120.8(2) . . ? 
C8 C9 C31 121.8(2) . . ? 
C9 C31 H31A 109.5 . . ? 
C9 C31 H31B 109.5 . . ? 
H31A C31 H31B 109.5 . . ? 
C9 C31 H31C 109.5 . . ? 
H31A C31 H31C 109.5 . . ? 
H31B C31 H31C 109.5 . . ? 
C11 C10 C9 122.5(2) . . ? 
C11 C10 H10 118.8 . . ? 
C9 C10 H10 118.8 . . ? 
C10 C11 C12 118.8(2) . . ? 
C10 C11 C32 121.9(2) . . ? 
C12 C11 C32 119.3(2) . . ? 
C11 C32 H32A 109.5 . . ? 
C11 C32 H32B 109.5 . . ? 
H32A C32 H32B 109.5 . . ? 
C11 C32 H32C 109.5 . . ? 
H32A C32 H32C 109.5 . . ? 
H32B C32 H32C 109.5 . . ? 
C13 C12 C11 120.5(2) . . ? 
C13 C12 H12 119.8 . . ? 
C11 C12 H12 119.8 . . ? 
C12 C13 C8 120.0(2) . . ? 
C12 C13 H13 120.0 . . ? 
C8 C13 H13 120.0 . . ? 
N4 C16 C2 121.3(2) . . ? 
N4 C16 H16 119.4 . . ? 
C2 C16 H16 119.4 . . ? 
C16 N4 C18 119.1(2) . . ? 
C16 N4 Ag1 110.59(16) . 5_665 ? 
C18 N4 Ag1 126.30(15) . 5_665 ? 
C19 C18 C23 120.5(2) . . ? 
C19 C18 N4 118.7(2) . . ? 
C23 C18 N4 120.7(2) . . ? 
C20 C19 C18 117.9(2) . . ? 
C20 C19 C41 120.3(2) . . ? 
C18 C19 C41 121.8(2) . . ? 
C19 C41 H41A 109.5 . . ? 
C19 C41 H41B 109.5 . . ? 
H41A C41 H41B 109.5 . . ? 
C19 C41 H41C 109.5 . . ? 
H41A C41 H41C 109.5 . . ? 
H41B C41 H41C 109.5 . . ? 
C21 C20 C19 122.4(2) . . ? 
C21 C20 H20 118.8 . . ? 
C19 C20 H20 118.8 . . ? 
C20 C21 C22 118.7(2) . . ? 
C20 C21 C42 120.9(2) . . ? 
C22 C21 C42 120.5(2) . . ? 
C21 C42 H42A 109.5 . . ? 
C21 C42 H42B 109.5 . . ? 
H42A C42 H42B 109.5 . . ? 
C21 C42 H42C 109.5 . . ? 
H42A C42 H42C 109.5 . . ? 
H42B C42 H42C 109.5 . . ? 
C23 C22 C21 120.5(2) . . ? 
C23 C22 H22 119.8 . . ? 
C21 C22 H22 119.8 . . ? 
C22 C23 C18 120.1(2) . . ? 
C22 C23 H23 120.0 . . ? 
C18 C23 H23 120.0 . . ? 
F14 B1 F12 110.2(2) . . ? 
F14 B1 F11 110.7(2) . . ? 
F12 B1 F11 109.9(2) . . ? 
F14 B1 F13 110.3(2) . . ? 
F12 B1 F13 107.5(2) . . ? 
F11 B1 F13 108.0(2) . . ? 
B1 F11 Ag1 133.36(14) . . ? 
N50 C50 H50A 109.5 . . ? 
N50 C50 H50B 109.5 . . ? 
H50A C50 H50B 109.5 . . ? 
N50 C50 H50C 109.5 . . ? 
H50A C50 H50C 109.5 . . ? 
H50B C50 H50C 109.5 . . ? 
O50 N50 O50 124.9(4) 2_654 . ? 
O50 N50 C50 117.56(19) 2_654 . ? 
O50 N50 C50 117.56(19) . . ? 
 
loop_ 
 _geom_torsion_atom_site_label_1 
 _geom_torsion_atom_site_label_2 
 _geom_torsion_atom_site_label_3 
 _geom_torsion_atom_site_label_4 
 _geom_torsion 
 _geom_torsion_site_symmetry_1 
 _geom_torsion_site_symmetry_2 
 _geom_torsion_site_symmetry_3 
 _geom_torsion_site_symmetry_4 
 _geom_torsion_publ_flag 
N2 Ag1 N1 N2 16.6(2) 5_665 . . . ? 
N3 Ag1 N1 N2 170.91(18) . . . . ? 
N4 Ag1 N1 N2 18.5(16) 5_665 . . . ? 
F11 Ag1 N1 N2 -95.12(18) . . . . ? 
N2 Ag1 N1 C5 -165.91(14) 5_665 . . . ? 
N3 Ag1 N1 C5 -11.62(14) . . . . ? 
N4 Ag1 N1 C5 -164.1(14) 5_665 . . . ? 
F11 Ag1 N1 C5 82.35(15) . . . . ? 
C5 N1 N2 C2 -1.9(3) . . . . ? 
Ag1 N1 N2 C2 175.42(15) . . . . ? 
C5 N1 N2 Ag1 164.05(15) . . . 5_665 ? 
Ag1 N1 N2 Ag1 -18.7(2) . . . 5_665 ? 
N1 N2 C2 C3 -4.1(3) . . . . ? 
Ag1 N2 C2 C3 -170.62(16) 5_665 . . . ? 
N1 N2 C2 C16 174.22(18) . . . . ? 
Ag1 N2 C2 C16 7.8(2) 5_665 . . . ? 
N2 C2 C3 C4 6.1(3) . . . . ? 
C16 C2 C3 C4 -172.3(2) . . . . ? 
C2 C3 C4 C5 -2.0(3) . . . . ? 
N2 N1 C5 C4 6.0(3) . . . . ? 
Ag1 N1 C5 C4 -171.79(17) . . . . ? 
N2 N1 C5 C6 -173.86(18) . . . . ? 
Ag1 N1 C5 C6 8.4(2) . . . . ? 
C3 C4 C5 N1 -3.9(3) . . . . ? 
C3 C4 C5 C6 176.0(2) . . . . ? 
N1 C5 C6 N3 4.7(3) . . . . ? 
C4 C5 C6 N3 -175.1(2) . . . . ? 
C5 C6 N3 C8 -177.12(19) . . . . ? 
C5 C6 N3 Ag1 -16.4(3) . . . . ? 
N2 Ag1 N3 C6 103.1(2) 5_665 . . . ? 
N4 Ag1 N3 C6 -166.79(15) 5_665 . . . ? 
N1 Ag1 N3 C6 14.31(15) . . . . ? 
F11 Ag1 N3 C6 -61.88(16) . . . . ? 
N2 Ag1 N3 C8 -97.2(2) 5_665 . . . ? 
N4 Ag1 N3 C8 -7.08(17) 5_665 . . . ? 
N1 Ag1 N3 C8 174.01(17) . . . . ? 
F11 Ag1 N3 C8 97.83(16) . . . . ? 
C6 N3 C8 C13 38.6(3) . . . . ? 
Ag1 N3 C8 C13 -120.6(2) . . . . ? 
C6 N3 C8 C9 -143.1(2) . . . . ? 
Ag1 N3 C8 C9 57.6(2) . . . . ? 
C13 C8 C9 C10 1.8(3) . . . . ? 
N3 C8 C9 C10 -176.45(19) . . . . ? 
C13 C8 C9 C31 -175.8(2) . . . . ? 
N3 C8 C9 C31 6.0(3) . . . . ? 
C8 C9 C10 C11 -1.1(3) . . . . ? 
C31 C9 C10 C11 176.5(2) . . . . ? 
C9 C10 C11 C12 -0.8(3) . . . . ? 
C9 C10 C11 C32 178.5(2) . . . . ? 
C10 C11 C12 C13 2.2(4) . . . . ? 
C32 C11 C12 C13 -177.2(2) . . . . ? 
C11 C12 C13 C8 -1.5(4) . . . . ? 
C9 C8 C13 C12 -0.5(3) . . . . ? 
N3 C8 C13 C12 177.7(2) . . . . ? 
N2 C2 C16 N4 -19.8(3) . . . . ? 
C3 C2 C16 N4 158.6(2) . . . . ? 
C2 C16 N4 C18 178.50(19) . . . . ? 
C2 C16 N4 Ag1 19.5(2) . . . 5_665 ? 
C16 N4 C18 C19 146.0(2) . . . . ? 
Ag1 N4 C18 C19 -58.6(3) 5_665 . . . ? 
C16 N4 C18 C23 -36.9(3) . . . . ? 
Ag1 N4 C18 C23 118.5(2) 5_665 . . . ? 
C23 C18 C19 C20 1.2(3) . . . . ? 
N4 C18 C19 C20 178.3(2) . . . . ? 
C23 C18 C19 C41 -178.8(2) . . . . ? 
N4 C18 C19 C41 -1.7(3) . . . . ? 
C18 C19 C20 C21 -1.4(4) . . . . ? 
C41 C19 C20 C21 178.6(2) . . . . ? 
C19 C20 C21 C22 0.5(4) . . . . ? 
C19 C20 C21 C42 -178.6(2) . . . . ? 
C20 C21 C22 C23 0.7(3) . . . . ? 
C42 C21 C22 C23 179.8(2) . . . . ? 
C21 C22 C23 C18 -0.9(3) . . . . ? 
C19 C18 C23 C22 -0.1(3) . . . . ? 
N4 C18 C23 C22 -177.1(2) . . . . ? 
F14 B1 F11 Ag1 -157.14(15) . . . . ? 
F12 B1 F11 Ag1 -35.1(3) . . . . ? 
F13 B1 F11 Ag1 82.0(2) . . . . ? 
N2 Ag1 F11 B1 -150.1(2) 5_665 . . . ? 
N3 Ag1 F11 B1 23.2(2) . . . . ? 
N4 Ag1 F11 B1 135.0(2) 5_665 . . . ? 
N1 Ag1 F11 B1 -47.1(2) . . . . ? 
 
_diffrn_measured_fraction_theta_max    0.994 
_diffrn_reflns_theta_full              26.40 
_diffrn_measured_fraction_theta_full   0.994 
_refine_diff_density_max    0.637 
_refine_diff_density_min   -0.496 
_refine_diff_density_rms    0.070 


#===END


 
data_jrp93_p21 
 
_audit_creation_method            SHELXL-97 
_chemical_name_systematic 
; 
 ? 
; 
_chemical_name_common             ? 
_chemical_melting_point           ? 
_chemical_formula_moiety          ? 
_chemical_formula_sum 
 'C60 H44 Ag2 B2 F8 N8' 
_chemical_formula_weight          1266.39 
 
loop_ 
 _atom_type_symbol 
 _atom_type_description 
 _atom_type_scat_dispersion_real 
 _atom_type_scat_dispersion_imag 
 _atom_type_scat_source 
 'C'  'C'   0.0033   0.0016 
 'International Tables Vol C Tables 4.2.6.8 and 6.1.1.4' 
 'H'  'H'   0.0000   0.0000 
 'International Tables Vol C Tables 4.2.6.8 and 6.1.1.4' 
 'Ag'  'Ag'  -0.8971   1.1015 
 'International Tables Vol C Tables 4.2.6.8 and 6.1.1.4' 
 'B'  'B'   0.0013   0.0007 
 'International Tables Vol C Tables 4.2.6.8 and 6.1.1.4' 
 'F'  'F'   0.0171   0.0103 
 'International Tables Vol C Tables 4.2.6.8 and 6.1.1.4' 
 'N'  'N'   0.0061   0.0033 
 'International Tables Vol C Tables 4.2.6.8 and 6.1.1.4' 
 
_symmetry_cell_setting          Monoclinic 
_symmetry_space_group_name_H-M    P2/c 
 
loop_ 
 _symmetry_equiv_pos_as_xyz 
 'x, y, z' 
 '-x, y, -z+1/2' 
 '-x, -y, -z' 
 'x, -y, z-1/2' 
 
_cell_length_a                    29.610(6) 
_cell_length_b                    12.576(3) 
_cell_length_c                    14.106(3) 
_cell_angle_alpha                 90.00 
_cell_angle_beta                  103.68(3) 
_cell_angle_gamma                 90.00 
_cell_volume                      5103.7(19) 
_cell_formula_units_Z             4 
_cell_measurement_temperature     83(2) 
_cell_measurement_reflns_used    9169
_cell_measurement_theta_min       2.1985
_cell_measurement_theta_max       32.8175
 
_exptl_crystal_description        'rhombic prism'
_exptl_crystal_colour             orange 
_exptl_crystal_size_max           0.20 
_exptl_crystal_size_mid           0.20 
_exptl_crystal_size_min           0.16 
_exptl_crystal_density_meas       ? 
_exptl_crystal_density_diffrn     1.648 
_exptl_crystal_density_method     'not measured' 
_exptl_crystal_F_000              2544 
_exptl_absorpt_coefficient_mu     0.848 
_exptl_absorpt_correction_type   'multi-scan' 
_exptl_absorpt_correction_T_min   0.640
_exptl_absorpt_correction_T_max    1.000
_exptl_absorpt_process_details    'SCALE (Bruker AXS Inc.)' 
 
_exptl_special_details 
; 
 ? 
; 
 
_diffrn_ambient_temperature       83(2) 
_diffrn_radiation_wavelength      0.71073 
_diffrn_radiation_type            MoK\a 
_diffrn_radiation_source          'fine-focus sealed tube' 
_diffrn_radiation_monochromator   graphite 
_diffrn_measurement_device_type   'Bruker Kappa Apex II area detector' 
_diffrn_measurement_method        ? 
_diffrn_detector_area_resol_mean  ? 
_diffrn_standards_number          ? 
_diffrn_standards_interval_count  ? 
_diffrn_standards_interval_time   ? 
_diffrn_standards_decay_%         ? 
_diffrn_reflns_number             96210 
_diffrn_reflns_av_R_equivalents   0.0492 
_diffrn_reflns_av_sigmaI/netI     0.0419 
_diffrn_reflns_limit_h_min        -37 
_diffrn_reflns_limit_h_max        37 
_diffrn_reflns_limit_k_min        -15 
_diffrn_reflns_limit_k_max        15 
_diffrn_reflns_limit_l_min        -17 
_diffrn_reflns_limit_l_max        17 
_diffrn_reflns_theta_min          2.80 
_diffrn_reflns_theta_max          26.37 
_reflns_number_total              10422 
_reflns_number_gt                 7055 
_reflns_threshold_expression      >2sigma(I) 
 
_computing_data_collection        ? 
_computing_cell_refinement        ? 
_computing_data_reduction         ? 
_computing_structure_solution     'SHELXS-97 (Sheldrick, 1990)' 
_computing_structure_refinement   'SHELXL-97 (Sheldrick, 1997)' 
_computing_molecular_graphics     ? 
_computing_publication_material   ? 
 
_refine_special_details 
; 
 Refinement of F^2^ against ALL reflections.  The weighted R-factor wR and 
 goodness of fit S are based on F^2^, conventional R-factors R are based 
 on F, with F set to zero for negative F^2^. The threshold expression of 
 F^2^ > 2sigma(F^2^) is used only for calculating R-factors(gt) etc. and is 
 not relevant to the choice of reflections for refinement.  R-factors based 
 on F^2^ are statistically about twice as large as those based on F, and R- 
 factors based on ALL data will be even larger. 

 All non-H ANIS except 0.2 occupancy atoms. All H calc and ride on attached
 atom. Two 'half' molecules in asymmetric unit. Side-by-side disilver 
 structures. No solvent present. 

 It is in P2/c (not P2(1)/c or C2/c or CCa). Final R1 is nice and is better
 than achieved in P1. Final refinement needed moderate damping. Between 
 twinning and pseudo C-centering, parameters between the two half molecules 
 are pretty badly correlated. Thus, errors in bond distances/angles are 
 underestimated somewhat.

 Both BF4s were modelled as 0.8:0.2 disorder. B1 as a twirl about B1-F11
 (F15, F16, F17) whereas for B2 a second BF4 (B21, F25, F26, F27, F28) 
 was identified. In both cases SAME was employed to improve geometry, and
 the Uiso for the 0.2 occupancy atoms constrained by use of FVARs 6 and 7.

; 
 
_refine_ls_structure_factor_coef  Fsqd  
_refine_ls_matrix_type            full 
_refine_ls_weighting_scheme       calc  
_refine_ls_weighting_details 
 'calc w=1/[\s^2^(Fo^2^)+(0.0230P)^2^+8.3533P] where P=(Fo^2^+2Fc^2^)/3' 
_atom_sites_solution_primary      direct 
_atom_sites_solution_secondary    difmap 
_atom_sites_solution_hydrogens    geom 
_refine_ls_hydrogen_treatment     constr 
_refine_ls_extinction_method      none 
_refine_ls_extinction_coef        ? 
_refine_ls_number_reflns          10422 
_refine_ls_number_parameters      752 
_refine_ls_number_restraints      429 
_refine_ls_R_factor_all           0.0530 
_refine_ls_R_factor_gt            0.0315 
_refine_ls_wR_factor_ref          0.1008 
_refine_ls_wR_factor_gt           0.0806 
_refine_ls_goodness_of_fit_ref    1.076 
_refine_ls_restrained_S_all       1.074 
_refine_ls_shift/su_max           0.001 
_refine_ls_shift/su_mean          0.000 
 
loop_ 
 _atom_site_label 
 _atom_site_type_symbol 
 _atom_site_fract_x 
 _atom_site_fract_y 
 _atom_site_fract_z 
 _atom_site_U_iso_or_equiv 
 _atom_site_adp_type 
 _atom_site_occupancy 
 _atom_site_symmetry_multiplicity 
 _atom_site_calc_flag 
 _atom_site_refinement_flags 
 _atom_site_disorder_assembly 
 _atom_site_disorder_group 
Ag1 Ag 0.423578(11) 0.24911(3) 0.71370(3) 0.02659(8) Uani 1 1 d . . . 
N1 N 0.47850(15) 0.1039(3) 0.7194(3) 0.0249(11) Uani 1 1 d U . . 
N2 N 0.39064(13) 0.1107(3) 0.6110(3) 0.0262(10) Uani 1 1 d U . . 
C2 C 0.45778(16) 0.0101(5) 0.6892(4) 0.0283(13) Uani 1 1 d U . . 
C3 C 0.4788(2) -0.0868(5) 0.7178(5) 0.0323(15) Uani 1 1 d U . . 
H3 H 0.4642 -0.1516 0.6931 0.039 Uiso 1 1 calc R . . 
C6 C 0.41097(15) 0.0200(4) 0.6211(4) 0.0281(13) Uani 1 1 d U . . 
H6A H 0.3965 -0.0401 0.5857 0.034 Uiso 1 1 calc R . . 
C8 C 0.34700(16) 0.1233(4) 0.5422(3) 0.0274(12) Uani 1 1 d U . . 
C9 C 0.31282(16) 0.0435(4) 0.5273(4) 0.0316(13) Uani 1 1 d U . . 
H9A H 0.3187 -0.0217 0.5620 0.038 Uiso 1 1 calc R . . 
C10 C 0.27089(17) 0.0601(4) 0.4624(4) 0.0353(13) Uani 1 1 d U . . 
H10A H 0.2476 0.0066 0.4523 0.042 Uiso 1 1 calc R . . 
C11 C 0.26266(17) 0.1552(4) 0.4117(4) 0.0358(14) Uani 1 1 d U . . 
H11A H 0.2338 0.1670 0.3663 0.043 Uiso 1 1 calc R . . 
C12 C 0.29654(19) 0.2326(4) 0.4274(4) 0.0323(13) Uani 1 1 d U . . 
H12A H 0.2904 0.2974 0.3920 0.039 Uiso 1 1 calc R . . 
C13 C 0.33876(17) 0.2201(4) 0.4918(4) 0.0272(12) Uani 1 1 d U . . 
C14 C 0.37412(17) 0.3058(4) 0.5055(4) 0.0294(12) Uani 1 1 d U . . 
C15 C 0.36167(17) 0.4098(4) 0.5201(4) 0.0308(12) Uani 1 1 d U . . 
H15A H 0.3305 0.4250 0.5224 0.037 Uiso 1 1 calc R . . 
C16 C 0.3940(2) 0.4929(5) 0.5314(4) 0.0396(14) Uani 1 1 d U . . 
H16A H 0.3852 0.5633 0.5435 0.048 Uiso 1 1 calc R . . 
C17 C 0.43953(19) 0.4708(4) 0.5247(4) 0.0378(15) Uani 1 1 d U . . 
H17A H 0.4615 0.5268 0.5298 0.045 Uiso 1 1 calc R . . 
C18 C 0.4524(2) 0.3677(4) 0.5108(4) 0.0379(14) Uani 1 1 d U . . 
H18A H 0.4834 0.3524 0.5078 0.046 Uiso 1 1 calc R . . 
C19 C 0.4197(2) 0.2854(4) 0.5010(3) 0.0351(13) Uani 1 1 d U . . 
H19A H 0.4289 0.2146 0.4912 0.042 Uiso 1 1 calc R . . 
C32 C 0.45783(17) 0.4869(5) 0.7685(4) 0.0283(13) Uani 1 1 d U . . 
N31 N 0.47855(15) 0.3947(4) 0.7589(4) 0.0279(12) Uani 1 1 d U . . 
N32 N 0.39045(14) 0.3898(3) 0.7836(3) 0.0284(10) Uani 1 1 d U . . 
C33 C 0.4787(2) 0.5851(5) 0.7601(5) 0.0318(16) Uani 1 1 d U . . 
H33 H 0.4635 0.6498 0.7682 0.038 Uiso 1 1 calc R . . 
C36 C 0.41219(16) 0.4778(4) 0.7925(4) 0.0302(14) Uani 1 1 d U . . 
H36A H 0.3988 0.5387 0.8149 0.036 Uiso 1 1 calc R . . 
C38 C 0.34777(17) 0.3783(4) 0.8105(4) 0.0301(13) Uani 1 1 d U . . 
C39 C 0.31539(17) 0.4620(4) 0.7968(4) 0.0354(14) Uani 1 1 d U . . 
H39A H 0.3222 0.5278 0.7702 0.042 Uiso 1 1 calc R . . 
C40 C 0.27332(18) 0.4476(5) 0.8225(4) 0.0405(15) Uani 1 1 d U . . 
H40A H 0.2513 0.5038 0.8138 0.049 Uiso 1 1 calc R . . 
C41 C 0.2635(2) 0.3512(5) 0.8609(5) 0.0480(16) Uani 1 1 d U . . 
H41A H 0.2347 0.3420 0.8781 0.058 Uiso 1 1 calc R . . 
C42 C 0.2951(2) 0.2678(5) 0.8746(4) 0.0420(16) Uani 1 1 d U . . 
H42A H 0.2877 0.2024 0.9010 0.050 Uiso 1 1 calc R . . 
C43 C 0.33774(18) 0.2799(4) 0.8498(4) 0.0344(13) Uani 1 1 d U . . 
C44 C 0.37187(19) 0.1914(4) 0.8688(4) 0.0344(13) Uani 1 1 d U . . 
C45 C 0.3580(2) 0.0867(5) 0.8408(4) 0.0451(16) Uani 1 1 d U . . 
H45A H 0.3268 0.0728 0.8072 0.054 Uiso 1 1 calc R . . 
C46 C 0.3897(2) 0.0034(6) 0.8618(4) 0.0440(15) Uani 1 1 d U . . 
H46A H 0.3797 -0.0669 0.8430 0.053 Uiso 1 1 calc R . . 
C47 C 0.4356(2) 0.0210(5) 0.9096(5) 0.0516(18) Uani 1 1 d U . . 
H47A H 0.4571 -0.0361 0.9223 0.062 Uiso 1 1 calc R . . 
C48 C 0.4493(2) 0.1231(5) 0.9383(4) 0.0469(16) Uani 1 1 d U . . 
H48A H 0.4806 0.1359 0.9717 0.056 Uiso 1 1 calc R . . 
C49 C 0.4182(2) 0.2079(4) 0.9194(4) 0.0375(14) Uani 1 1 d U . . 
H49A H 0.4284 0.2774 0.9408 0.045 Uiso 1 1 calc R . . 
Ag2 Ag 0.076434(9) 0.25116(3) 0.28676(3) 0.01738(6) Uani 1 1 d . . . 
N61 N 0.02071(14) 0.3977(3) 0.2794(3) 0.0182(10) Uani 1 1 d U . . 
C62 C 0.04235(15) 0.4895(4) 0.3106(3) 0.0162(10) Uani 1 1 d U . . 
N62 N 0.10925(13) 0.3902(3) 0.3892(3) 0.0174(9) Uani 1 1 d U . . 
C63 C 0.02145(18) 0.5894(4) 0.2822(4) 0.0203(13) Uani 1 1 d U . . 
H63 H 0.0365 0.6539 0.3066 0.024 Uiso 1 1 calc R . . 
C66 C 0.08800(14) 0.4803(4) 0.3778(3) 0.0167(11) Uani 1 1 d U . . 
H66A H 0.1020 0.5408 0.4131 0.020 Uiso 1 1 calc R . . 
C68 C 0.15243(15) 0.3778(4) 0.4574(3) 0.0190(11) Uani 1 1 d U . . 
C69 C 0.18686(15) 0.4567(4) 0.4725(4) 0.0220(11) Uani 1 1 d U . . 
H69A H 0.1814 0.5214 0.4370 0.026 Uiso 1 1 calc R . . 
C70 C 0.22852(17) 0.4402(4) 0.5387(4) 0.0276(12) Uani 1 1 d U . . 
H70A H 0.2515 0.4944 0.5495 0.033 Uiso 1 1 calc R . . 
C71 C 0.23723(18) 0.3461(4) 0.5894(4) 0.0301(13) Uani 1 1 d U . . 
H71A H 0.2662 0.3353 0.6345 0.036 Uiso 1 1 calc R . . 
C72 C 0.20373(18) 0.2670(4) 0.5747(4) 0.0271(13) Uani 1 1 d U . . 
H72A H 0.2099 0.2025 0.6105 0.033 Uiso 1 1 calc R . . 
C73 C 0.16114(16) 0.2804(4) 0.5083(3) 0.0200(11) Uani 1 1 d U . . 
C74 C 0.12557(16) 0.1942(3) 0.4951(3) 0.0201(11) Uani 1 1 d U . . 
C75 C 0.13825(18) 0.0894(4) 0.4802(4) 0.0256(12) Uani 1 1 d U . . 
H75A H 0.1693 0.0742 0.4771 0.031 Uiso 1 1 calc R . . 
C76 C 0.10613(18) 0.0076(5) 0.4697(3) 0.0290(12) Uani 1 1 d U . . 
H76A H 0.1152 -0.0632 0.4596 0.035 Uiso 1 1 calc R . . 
C77 C 0.06062(18) 0.0291(4) 0.4741(3) 0.0304(14) Uani 1 1 d U . . 
H77A H 0.0386 -0.0270 0.4669 0.036 Uiso 1 1 calc R . . 
C78 C 0.04726(19) 0.1325(4) 0.4889(4) 0.0296(13) Uani 1 1 d U . . 
H78A H 0.0161 0.1471 0.4919 0.035 Uiso 1 1 calc R . . 
C79 C 0.07954(16) 0.2149(4) 0.4994(3) 0.0212(11) Uani 1 1 d U . . 
H79A H 0.0703 0.2855 0.5096 0.025 Uiso 1 1 calc R . . 
N91 N 0.02097(15) 0.1059(3) 0.2418(3) 0.0192(11) Uani 1 1 d U . . 
C92 C 0.04238(17) 0.0134(4) 0.2312(3) 0.0199(12) Uani 1 1 d U . . 
N92 N 0.10899(13) 0.1121(3) 0.2163(3) 0.0184(9) Uani 1 1 d U . . 
C93 C 0.02169(19) -0.0852(4) 0.2394(4) 0.0221(14) Uani 1 1 d U . . 
H93 H 0.0368 -0.1498 0.2306 0.027 Uiso 1 1 calc R . . 
C96 C 0.08827(15) 0.0223(4) 0.2079(3) 0.0206(12) Uani 1 1 d U . . 
H96A H 0.1023 -0.0384 0.1868 0.025 Uiso 1 1 calc R . . 
C98 C 0.15201(16) 0.1222(4) 0.1888(4) 0.0206(12) Uani 1 1 d U . . 
C99 C 0.18468(16) 0.0398(4) 0.2035(4) 0.0257(12) Uani 1 1 d U . . 
H99A H 0.1782 -0.0259 0.2308 0.031 Uiso 1 1 calc R . . 
C100 C 0.22668(18) 0.0547(5) 0.1776(4) 0.0343(14) Uani 1 1 d U . . 
H10B H 0.2489 -0.0012 0.1868 0.041 Uiso 1 1 calc R . . 
C101 C 0.2365(2) 0.1508(5) 0.1385(5) 0.0417(16) Uani 1 1 d U . . 
H10C H 0.2651 0.1605 0.1203 0.050 Uiso 1 1 calc R . . 
C102 C 0.2041(2) 0.2332(5) 0.1260(4) 0.0365(15) Uani 1 1 d U . . 
H10D H 0.2113 0.2993 0.1006 0.044 Uiso 1 1 calc R . . 
C103 C 0.16111(17) 0.2206(4) 0.1500(4) 0.0259(12) Uani 1 1 d U . . 
C104 C 0.12754(19) 0.3085(4) 0.1310(4) 0.0261(12) Uani 1 1 d U . . 
C105 C 0.1413(2) 0.4129(4) 0.1597(4) 0.0316(14) Uani 1 1 d U . . 
H10E H 0.1724 0.4265 0.1939 0.038 Uiso 1 1 calc R . . 
C106 C 0.1096(2) 0.4972(6) 0.1384(4) 0.0350(13) Uani 1 1 d U . . 
H10F H 0.1196 0.5675 0.1572 0.042 Uiso 1 1 calc R . . 
C107 C 0.0647(2) 0.4792(5) 0.0912(4) 0.0386(16) Uani 1 1 d U . . 
H10G H 0.0433 0.5366 0.0782 0.046 Uiso 1 1 calc R . . 
C108 C 0.0500(2) 0.3769(4) 0.0617(4) 0.0339(14) Uani 1 1 d U . . 
H10H H 0.0186 0.3643 0.0282 0.041 Uiso 1 1 calc R . . 
C109 C 0.0818(2) 0.2925(4) 0.0819(4) 0.0294(13) Uani 1 1 d U . . 
H10I H 0.0717 0.2227 0.0613 0.035 Uiso 1 1 calc R . . 
B1 B 0.37003(18) 0.7450(5) 0.6790(6) 0.0463(15) Uani 1 1 d D . . 
F11 F 0.34787(12) 0.8410(3) 0.6666(3) 0.0627(11) Uani 1 1 d D A . 
F12 F 0.33962(18) 0.6601(4) 0.6663(4) 0.0613(15) Uani 0.80 1 d PD A 1 
F13 F 0.40222(12) 0.7366(3) 0.6231(3) 0.0354(9) Uani 0.80 1 d PD A 1 
F14 F 0.39701(17) 0.7427(4) 0.7760(3) 0.0549(14) Uani 0.80 1 d PD A 1 
F15 F 0.4181(4) 0.7482(12) 0.6876(13) 0.049(3) Uiso 0.20 1 d PD A 2 
F16 F 0.3421(7) 0.6600(14) 0.6432(16) 0.049(3) Uiso 0.20 1 d PD A 2 
F17 F 0.3832(6) 0.7316(16) 0.7858(10) 0.049(3) Uiso 0.20 1 d PD A 2 
B2 B 0.13078(19) 0.7557(6) 0.3142(7) 0.0278(13) Uani 0.80 1 d PD B 1 
F21 F 0.10466(13) 0.7591(3) 0.2209(2) 0.0309(9) Uani 0.80 1 d PD B 1 
F22 F 0.15279(18) 0.6587(4) 0.3384(5) 0.0572(17) Uani 0.80 1 d PD B 1 
F23 F 0.16279(13) 0.8389(3) 0.3405(5) 0.0493(14) Uani 0.80 1 d PD B 1 
F24 F 0.09731(15) 0.7626(4) 0.3733(2) 0.0351(11) Uani 0.80 1 d PD B 1 
B21 B 0.1218(5) 0.7559(15) 0.3153(16) 0.0292(15) Uiso 0.20 1 d PD C 2 
F25 F 0.0756(4) 0.7456(10) 0.2773(10) 0.0292(15) Uiso 0.20 1 d PD C 2 
F26 F 0.1480(5) 0.8480(12) 0.3264(14) 0.0292(15) Uiso 0.20 1 d PD C 2 
F27 F 0.1489(6) 0.6657(13) 0.3198(15) 0.0292(15) Uiso 0.20 1 d PD C 2 
F28 F 0.1050(6) 0.7612(14) 0.4015(10) 0.0292(15) Uiso 0.20 1 d PD C 2 
 
loop_ 
 _atom_site_aniso_label 
 _atom_site_aniso_U_11 
 _atom_site_aniso_U_22 
 _atom_site_aniso_U_33 
 _atom_site_aniso_U_23 
 _atom_site_aniso_U_13 
 _atom_site_aniso_U_12 
Ag1 0.02172(14) 0.02132(13) 0.03608(16) -0.00360(15) 0.0055(2) -0.00040(17) 
N1 0.0210(19) 0.0201(19) 0.033(2) 0.0009(17) 0.0049(17) -0.0031(16) 
N2 0.0207(19) 0.0245(19) 0.033(2) -0.0006(16) 0.0056(17) -0.0017(16) 
C2 0.021(2) 0.027(3) 0.038(3) 0.000(2) 0.007(2) -0.003(2) 
C3 0.030(3) 0.024(3) 0.043(3) -0.002(2) 0.008(2) -0.005(2) 
C6 0.020(2) 0.029(3) 0.034(2) -0.004(2) 0.0054(19) -0.006(2) 
C8 0.024(2) 0.027(2) 0.031(2) -0.0074(19) 0.0057(19) -0.002(2) 
C9 0.026(2) 0.027(2) 0.042(3) -0.005(2) 0.008(2) -0.004(2) 
C10 0.021(2) 0.037(3) 0.048(3) -0.011(2) 0.007(2) -0.001(2) 
C11 0.018(2) 0.047(3) 0.038(3) -0.006(2) 0.000(2) -0.001(2) 
C12 0.031(3) 0.028(3) 0.036(2) -0.001(2) 0.004(2) 0.002(2) 
C13 0.029(2) 0.025(2) 0.028(2) -0.0035(19) 0.008(2) 0.004(2) 
C14 0.030(2) 0.028(2) 0.029(2) -0.002(2) 0.004(2) -0.004(2) 
C15 0.025(2) 0.032(3) 0.033(2) 0.004(2) 0.004(2) 0.002(2) 
C16 0.052(3) 0.026(2) 0.039(3) 0.005(3) 0.006(3) -0.005(3) 
C17 0.040(3) 0.036(3) 0.035(3) 0.007(2) 0.005(2) -0.017(2) 
C18 0.031(3) 0.040(3) 0.042(3) 0.007(2) 0.008(2) -0.004(2) 
C19 0.040(3) 0.028(2) 0.038(2) 0.0010(19) 0.011(2) -0.001(2) 
C32 0.019(2) 0.028(3) 0.037(3) -0.005(2) 0.004(2) 0.000(2) 
N31 0.020(2) 0.025(2) 0.038(3) -0.0024(19) 0.0070(19) -0.0020(17) 
N32 0.023(2) 0.024(2) 0.036(2) -0.0020(17) 0.0028(18) -0.0001(17) 
C33 0.027(3) 0.025(3) 0.041(3) -0.002(2) 0.003(2) 0.004(2) 
C36 0.024(2) 0.026(3) 0.039(3) -0.004(2) 0.004(2) 0.005(2) 
C38 0.027(2) 0.032(3) 0.031(2) -0.009(2) 0.005(2) -0.002(2) 
C39 0.024(2) 0.039(3) 0.040(3) -0.009(2) 0.002(2) -0.001(2) 
C40 0.023(3) 0.054(3) 0.044(3) -0.009(3) 0.007(2) 0.004(2) 
C41 0.032(3) 0.059(3) 0.057(3) -0.016(3) 0.020(2) -0.007(3) 
C42 0.031(3) 0.050(3) 0.048(3) -0.010(3) 0.016(2) -0.007(2) 
C43 0.029(3) 0.035(3) 0.040(3) -0.009(2) 0.010(2) -0.007(2) 
C44 0.035(3) 0.033(3) 0.039(3) -0.002(2) 0.017(2) -0.004(2) 
C45 0.058(3) 0.037(3) 0.047(3) 0.000(2) 0.025(3) -0.012(3) 
C46 0.064(4) 0.029(3) 0.047(3) 0.003(3) 0.030(3) -0.004(3) 
C47 0.060(4) 0.046(4) 0.057(3) 0.016(3) 0.031(3) 0.013(3) 
C48 0.046(3) 0.043(3) 0.053(3) 0.013(3) 0.015(3) 0.010(3) 
C49 0.035(3) 0.036(3) 0.043(3) 0.006(2) 0.013(2) 0.000(2) 
Ag2 0.01807(13) 0.01251(10) 0.02120(12) -0.00328(12) 0.0039(2) -0.00027(17) 
N61 0.0110(17) 0.0153(18) 0.027(2) 0.0007(17) 0.0011(16) 0.0002(15) 
C62 0.015(2) 0.015(2) 0.019(2) -0.0016(19) 0.0067(17) -0.001(2) 
N62 0.0149(18) 0.0165(18) 0.0218(18) -0.0014(15) 0.0066(16) -0.0009(15) 
C63 0.012(2) 0.012(2) 0.036(3) -0.002(2) 0.006(2) 0.0011(18) 
C66 0.015(2) 0.016(2) 0.021(2) -0.0023(18) 0.0073(17) -0.0030(18) 
C68 0.014(2) 0.021(2) 0.023(2) -0.0044(18) 0.0043(18) 0.0005(18) 
C69 0.015(2) 0.020(2) 0.031(2) -0.0035(19) 0.0062(18) -0.0021(18) 
C70 0.018(2) 0.026(2) 0.038(3) -0.009(2) 0.005(2) -0.006(2) 
C71 0.024(2) 0.027(2) 0.035(3) -0.006(2) -0.001(2) 0.002(2) 
C72 0.020(2) 0.026(3) 0.031(3) -0.006(2) -0.0020(19) 0.001(2) 
C73 0.018(2) 0.018(2) 0.024(2) -0.0058(18) 0.0043(19) -0.0003(18) 
C74 0.022(2) 0.017(2) 0.019(2) 0.0034(18) -0.0014(18) -0.0030(19) 
C75 0.029(3) 0.021(2) 0.025(2) 0.000(2) 0.002(2) 0.001(2) 
C76 0.048(3) 0.016(2) 0.019(2) 0.002(2) 0.002(2) -0.003(3) 
C77 0.034(3) 0.029(3) 0.023(2) 0.005(2) -0.001(2) -0.013(2) 
C78 0.026(2) 0.033(3) 0.030(2) 0.004(2) 0.007(2) -0.008(2) 
C79 0.015(2) 0.021(2) 0.026(2) 0.0022(17) 0.0022(19) -0.0027(19) 
N91 0.0163(19) 0.0155(19) 0.026(2) -0.0040(17) 0.0047(18) -0.0008(15) 
C92 0.021(2) 0.015(2) 0.022(2) -0.002(2) 0.0029(19) 0.000(2) 
N92 0.0147(18) 0.0198(19) 0.0202(18) -0.0027(16) 0.0033(16) -0.0007(16) 
C93 0.018(2) 0.014(2) 0.032(3) -0.002(2) 0.001(2) 0.0012(19) 
C96 0.017(2) 0.021(3) 0.024(2) -0.006(2) 0.0045(19) -0.0008(19) 
C98 0.013(2) 0.024(2) 0.023(2) -0.006(2) 0.0014(18) -0.0006(19) 
C99 0.022(2) 0.026(3) 0.028(2) -0.008(2) 0.004(2) -0.001(2) 
C100 0.022(3) 0.044(3) 0.037(3) -0.011(2) 0.008(2) 0.010(2) 
C101 0.021(2) 0.057(3) 0.050(3) -0.007(3) 0.014(2) -0.002(3) 
C102 0.027(3) 0.040(3) 0.046(3) -0.001(3) 0.016(2) -0.008(2) 
C103 0.024(2) 0.031(3) 0.025(2) -0.003(2) 0.011(2) -0.005(2) 
C104 0.033(3) 0.021(2) 0.028(3) -0.001(2) 0.015(2) -0.002(2) 
C105 0.039(3) 0.031(3) 0.029(3) -0.003(2) 0.017(2) -0.007(2) 
C106 0.062(3) 0.019(2) 0.034(3) 0.002(3) 0.030(3) 0.000(3) 
C107 0.054(3) 0.032(3) 0.037(3) 0.012(2) 0.025(2) 0.012(3) 
C108 0.032(3) 0.036(3) 0.037(3) 0.011(2) 0.017(2) 0.011(2) 
C109 0.039(3) 0.025(2) 0.028(2) 0.0016(19) 0.014(2) -0.002(2) 
B1 0.027(3) 0.044(3) 0.061(4) 0.004(3) -0.003(4) 0.002(3) 
F11 0.052(2) 0.0468(19) 0.091(3) 0.026(2) 0.020(2) 0.0092(16) 
F12 0.074(3) 0.051(2) 0.068(3) 0.004(3) 0.033(3) -0.026(2) 
F13 0.0270(18) 0.036(2) 0.043(2) -0.0083(17) 0.0095(16) -0.0143(16) 
F14 0.059(3) 0.057(3) 0.050(2) -0.001(2) 0.013(2) 0.023(2) 
B2 0.021(3) 0.024(3) 0.040(3) 0.010(3) 0.012(4) -0.002(3) 
F21 0.0337(18) 0.039(2) 0.0208(16) 0.0034(16) 0.0088(15) 0.0233(18) 
F22 0.036(2) 0.043(2) 0.087(4) 0.038(3) 0.003(3) 0.0222(19) 
F23 0.0212(19) 0.038(2) 0.089(4) 0.001(3) 0.016(2) -0.0128(17) 
F24 0.037(2) 0.046(2) 0.0170(17) -0.0045(18) -0.0022(16) -0.0134(19) 
 
_geom_special_details 
; 
 All esds (except the esd in the dihedral angle between two l.s. planes) 
 are estimated using the full covariance matrix.  The cell esds are taken 
 into account individually in the estimation of esds in distances, angles 
 and torsion angles; correlations between esds in cell parameters are only 
 used when they are defined by crystal symmetry.  An approximate (isotropic) 
 treatment of cell esds is used for estimating esds involving l.s. planes. 
; 
 
loop_ 
 _geom_bond_atom_site_label_1 
 _geom_bond_atom_site_label_2 
 _geom_bond_distance 
 _geom_bond_site_symmetry_2 
 _geom_bond_publ_flag 
Ag1 N2 2.326(4) . y 
Ag1 N32 2.350(4) . y 
Ag1 N31 2.432(5) . y 
Ag1 N1 2.434(4) . y 
N1 C2 1.351(7) . ? 
N1 N1 1.359(8) 2_656 ? 
N2 C6 1.283(6) . ? 
N2 C8 1.430(6) . ? 
C2 C3 1.385(8) . ? 
C2 C6 1.493(6) . ? 
C3 C3 1.364(11) 2_656 ? 
C3 H3 0.9500 . ? 
C6 H6A 0.9500 . ? 
C8 C13 1.402(7) . ? 
C8 C9 1.405(7) . ? 
C9 C10 1.373(7) . ? 
C9 H9A 0.9500 . ? 
C10 C11 1.385(7) . ? 
C10 H10A 0.9500 . ? 
C11 C12 1.378(7) . ? 
C11 H11A 0.9500 . ? 
C12 C13 1.370(7) . ? 
C12 H12A 0.9500 . ? 
C13 C14 1.483(7) . ? 
C14 C15 1.388(7) . ? 
C14 C19 1.390(8) . ? 
C15 C16 1.401(8) . ? 
C15 H15A 0.9500 . ? 
C16 C17 1.401(8) . ? 
C16 H16A 0.9500 . ? 
C17 C18 1.379(8) . ? 
C17 H17A 0.9500 . ? 
C18 C19 1.401(8) . ? 
C18 H18A 0.9500 . ? 
C19 H19A 0.9500 . ? 
C32 N31 1.334(7) . ? 
C32 C33 1.399(8) . ? 
C32 C36 1.473(7) . ? 
N31 N31 1.352(9) 2_656 ? 
N32 C36 1.272(6) . ? 
N32 C38 1.411(7) . ? 
C33 C33 1.357(12) 2_656 ? 
C33 H33 0.9500 . ? 
C36 H36A 0.9500 . ? 
C38 C39 1.406(7) . ? 
C38 C43 1.416(8) . ? 
C39 C40 1.389(7) . ? 
C39 H39A 0.9500 . ? 
C40 C41 1.386(8) . ? 
C40 H40A 0.9500 . ? 
C41 C42 1.387(8) . ? 
C41 H41A 0.9500 . ? 
C42 C43 1.396(8) . ? 
C42 H42A 0.9500 . ? 
C43 C44 1.484(8) . ? 
C44 C49 1.403(8) . ? 
C44 C45 1.408(7) . ? 
C45 C46 1.391(9) . ? 
C45 H45A 0.9500 . ? 
C46 C47 1.383(9) . ? 
C46 H46A 0.9500 . ? 
C47 C48 1.378(9) . ? 
C47 H47A 0.9500 . ? 
C48 C49 1.393(8) . ? 
C48 H48A 0.9500 . ? 
C49 H49A 0.9500 . ? 
Ag2 N62 2.330(4) . y 
Ag2 N92 2.331(4) . y 
Ag2 N91 2.438(4) . y 
Ag2 N61 2.460(4) . y 
N61 N61 1.308(8) 2 ? 
N61 C62 1.343(6) . ? 
C62 C63 1.416(7) . ? 
C62 C66 1.460(6) . ? 
N62 C66 1.287(6) . ? 
N62 C68 1.415(6) . ? 
C63 C63 1.376(10) 2 ? 
C63 H63 0.9500 . ? 
C66 H66A 0.9500 . ? 
C68 C69 1.402(6) . ? 
C68 C73 1.413(6) . ? 
C69 C70 1.376(7) . ? 
C69 H69A 0.9500 . ? 
C70 C71 1.376(7) . ? 
C70 H70A 0.9500 . ? 
C71 C72 1.385(7) . ? 
C71 H71A 0.9500 . ? 
C72 C73 1.392(7) . ? 
C72 H72A 0.9500 . ? 
C73 C74 1.492(6) . ? 
C74 C75 1.400(6) . ? 
C74 C79 1.403(7) . ? 
C75 C76 1.385(8) . ? 
C75 H75A 0.9500 . ? 
C76 C77 1.390(7) . ? 
C76 H76A 0.9500 . ? 
C77 C78 1.389(7) . ? 
C77 H77A 0.9500 . ? 
C78 C79 1.393(7) . ? 
C78 H78A 0.9500 . ? 
C79 H79A 0.9500 . ? 
N91 N91 1.315(9) 2 ? 
N91 C92 1.350(7) . ? 
C92 C93 1.400(8) . ? 
C92 C96 1.476(6) . ? 
N92 C96 1.277(6) . ? 
N92 C98 1.422(6) . ? 
C93 C93 1.386(12) 2 ? 
C93 H93 0.9500 . ? 
C96 H96A 0.9500 . ? 
C98 C99 1.400(7) . ? 
C98 C103 1.405(7) . ? 
C99 C100 1.389(7) . ? 
C99 H99A 0.9500 . ? 
C100 C101 1.388(8) . ? 
C100 H10B 0.9500 . ? 
C101 C102 1.394(8) . ? 
C101 H10C 0.9500 . ? 
C102 C103 1.401(7) . ? 
C102 H10D 0.9500 . ? 
C103 C104 1.468(7) . ? 
C104 C109 1.383(8) . ? 
C104 C105 1.406(7) . ? 
C105 C106 1.399(8) . ? 
C105 H10E 0.9500 . ? 
C106 C107 1.359(8) . ? 
C106 H10F 0.9500 . ? 
C107 C108 1.390(8) . ? 
C107 H10G 0.9500 . ? 
C108 C109 1.403(7) . ? 
C108 H10H 0.9500 . ? 
C109 H10I 0.9500 . ? 
B1 F11 1.365(7) . ? 
B1 F16 1.372(14) . ? 
B1 F13 1.377(8) . ? 
B1 F12 1.381(8) . ? 
B1 F15 1.401(13) . ? 
B1 F14 1.413(9) . ? 
B1 F17 1.474(15) . ? 
B2 F21 1.361(8) . ? 
B2 F22 1.387(8) . ? 
B2 F23 1.402(7) . ? 
B2 F24 1.441(8) . ? 
B21 F25 1.353(14) . ? 
B21 F27 1.381(17) . ? 
B21 F26 1.383(17) . ? 
B21 F28 1.42(2) . ? 
F25 F28 1.774(18) . ? 
 
loop_ 
 _geom_angle_atom_site_label_1 
 _geom_angle_atom_site_label_2 
 _geom_angle_atom_site_label_3 
 _geom_angle 
 _geom_angle_site_symmetry_1 
 _geom_angle_site_symmetry_3 
 _geom_angle_publ_flag 
N2 Ag1 N32 132.03(12) . . y 
N2 Ag1 N31 151.92(16) . . y 
N32 Ag1 N31 69.10(15) . . y 
N2 Ag1 N1 68.76(14) . . y 
N32 Ag1 N1 153.25(15) . . y 
N31 Ag1 N1 98.94(14) . . y 
C2 N1 N1 119.2(3) . 2_656 ? 
C2 N1 Ag1 113.2(3) . . ? 
N1 N1 Ag1 122.6(2) 2_656 . ? 
C6 N2 C8 119.9(4) . . ? 
C6 N2 Ag1 118.7(3) . . ? 
C8 N2 Ag1 121.3(3) . . ? 
N1 C2 C3 122.5(4) . . ? 
N1 C2 C6 114.4(5) . . ? 
C3 C2 C6 123.1(5) . . ? 
C3 C3 C2 118.3(3) 2_656 . ? 
C3 C3 H3 120.9 2_656 . ? 
C2 C3 H3 120.9 . . ? 
N2 C6 C2 119.0(5) . . ? 
N2 C6 H6A 120.5 . . ? 
C2 C6 H6A 120.5 . . ? 
C13 C8 C9 120.8(4) . . ? 
C13 C8 N2 117.5(4) . . ? 
C9 C8 N2 121.8(4) . . ? 
C10 C9 C8 119.8(5) . . ? 
C10 C9 H9A 120.1 . . ? 
C8 C9 H9A 120.1 . . ? 
C9 C10 C11 119.7(5) . . ? 
C9 C10 H10A 120.1 . . ? 
C11 C10 H10A 120.1 . . ? 
C12 C11 C10 119.7(5) . . ? 
C12 C11 H11A 120.2 . . ? 
C10 C11 H11A 120.2 . . ? 
C13 C12 C11 122.7(5) . . ? 
C13 C12 H12A 118.6 . . ? 
C11 C12 H12A 118.6 . . ? 
C12 C13 C8 117.3(5) . . ? 
C12 C13 C14 120.5(4) . . ? 
C8 C13 C14 122.2(4) . . ? 
C15 C14 C19 118.4(5) . . ? 
C15 C14 C13 120.0(5) . . ? 
C19 C14 C13 121.6(4) . . ? 
C14 C15 C16 121.5(5) . . ? 
C14 C15 H15A 119.3 . . ? 
C16 C15 H15A 119.3 . . ? 
C15 C16 C17 119.1(6) . . ? 
C15 C16 H16A 120.4 . . ? 
C17 C16 H16A 120.4 . . ? 
C18 C17 C16 119.9(5) . . ? 
C18 C17 H17A 120.0 . . ? 
C16 C17 H17A 120.0 . . ? 
C17 C18 C19 120.1(5) . . ? 
C17 C18 H18A 119.9 . . ? 
C19 C18 H18A 119.9 . . ? 
C14 C19 C18 121.0(5) . . ? 
C14 C19 H19A 119.5 . . ? 
C18 C19 H19A 119.5 . . ? 
N31 C32 C33 122.4(5) . . ? 
N31 C32 C36 115.2(5) . . ? 
C33 C32 C36 122.4(5) . . ? 
C32 N31 N31 119.6(3) . 2_656 ? 
C32 N31 Ag1 112.7(3) . . ? 
N31 N31 Ag1 123.5(3) 2_656 . ? 
C36 N32 C38 121.9(4) . . ? 
C36 N32 Ag1 116.4(3) . . ? 
C38 N32 Ag1 121.6(3) . . ? 
C33 C33 C32 118.0(3) 2_656 . ? 
C33 C33 H33 121.0 2_656 . ? 
C32 C33 H33 121.0 . . ? 
N32 C36 C32 121.0(5) . . ? 
N32 C36 H36A 119.5 . . ? 
C32 C36 H36A 119.5 . . ? 
C39 C38 N32 120.7(5) . . ? 
C39 C38 C43 120.6(5) . . ? 
N32 C38 C43 118.7(5) . . ? 
C40 C39 C38 119.4(5) . . ? 
C40 C39 H39A 120.3 . . ? 
C38 C39 H39A 120.3 . . ? 
C41 C40 C39 119.9(5) . . ? 
C41 C40 H40A 120.0 . . ? 
C39 C40 H40A 120.0 . . ? 
C40 C41 C42 121.3(6) . . ? 
C40 C41 H41A 119.3 . . ? 
C42 C41 H41A 119.3 . . ? 
C41 C42 C43 120.2(6) . . ? 
C41 C42 H42A 119.9 . . ? 
C43 C42 H42A 119.9 . . ? 
C42 C43 C38 118.6(5) . . ? 
C42 C43 C44 119.4(5) . . ? 
C38 C43 C44 121.9(5) . . ? 
C49 C44 C45 117.8(5) . . ? 
C49 C44 C43 121.5(5) . . ? 
C45 C44 C43 120.6(5) . . ? 
C46 C45 C44 120.4(6) . . ? 
C46 C45 H45A 119.8 . . ? 
C44 C45 H45A 119.8 . . ? 
C47 C46 C45 121.3(7) . . ? 
C47 C46 H46A 119.4 . . ? 
C45 C46 H46A 119.4 . . ? 
C48 C47 C46 118.6(6) . . ? 
C48 C47 H47A 120.7 . . ? 
C46 C47 H47A 120.7 . . ? 
C47 C48 C49 121.4(6) . . ? 
C47 C48 H48A 119.3 . . ? 
C49 C48 H48A 119.3 . . ? 
C48 C49 C44 120.4(5) . . ? 
C48 C49 H49A 119.8 . . ? 
C44 C49 H49A 119.8 . . ? 
N62 Ag2 N92 132.40(11) . . y 
N62 Ag2 N91 151.66(15) . . y 
N92 Ag2 N91 69.38(14) . . y 
N62 Ag2 N61 68.95(13) . . y 
N92 Ag2 N61 152.31(14) . . y 
N91 Ag2 N61 98.43(13) . . y 
N61 N61 C62 120.7(3) 2 . ? 
N61 N61 Ag2 123.1(2) 2 . ? 
C62 N61 Ag2 111.5(3) . . ? 
N61 C62 C63 121.8(4) . . ? 
N61 C62 C66 116.2(4) . . ? 
C63 C62 C66 122.0(4) . . ? 
C66 N62 C68 121.2(4) . . ? 
C66 N62 Ag2 117.6(3) . . ? 
C68 N62 Ag2 121.1(3) . . ? 
C63 C63 C62 117.4(3) 2 . ? 
C63 C63 H63 121.3 2 . ? 
C62 C63 H63 121.3 . . ? 
N62 C66 C62 120.1(4) . . ? 
N62 C66 H66A 119.9 . . ? 
C62 C66 H66A 119.9 . . ? 
C69 C68 C73 119.8(4) . . ? 
C69 C68 N62 122.2(4) . . ? 
C73 C68 N62 117.9(4) . . ? 
C70 C69 C68 120.0(4) . . ? 
C70 C69 H69A 120.0 . . ? 
C68 C69 H69A 120.0 . . ? 
C69 C70 C71 120.7(5) . . ? 
C69 C70 H70A 119.7 . . ? 
C71 C70 H70A 119.7 . . ? 
C70 C71 C72 120.0(5) . . ? 
C70 C71 H71A 120.0 . . ? 
C72 C71 H71A 120.0 . . ? 
C71 C72 C73 121.1(5) . . ? 
C71 C72 H72A 119.4 . . ? 
C73 C72 H72A 119.4 . . ? 
C72 C73 C68 118.3(4) . . ? 
C72 C73 C74 119.8(4) . . ? 
C68 C73 C74 121.9(4) . . ? 
C75 C74 C79 118.6(4) . . ? 
C75 C74 C73 119.8(4) . . ? 
C79 C74 C73 121.6(4) . . ? 
C76 C75 C74 120.9(5) . . ? 
C76 C75 H75A 119.5 . . ? 
C74 C75 H75A 119.5 . . ? 
C75 C76 C77 119.9(6) . . ? 
C75 C76 H76A 120.0 . . ? 
C77 C76 H76A 120.0 . . ? 
C78 C77 C76 120.2(5) . . ? 
C78 C77 H77A 119.9 . . ? 
C76 C77 H77A 119.9 . . ? 
C77 C78 C79 119.9(5) . . ? 
C77 C78 H78A 120.0 . . ? 
C79 C78 H78A 120.0 . . ? 
C78 C79 C74 120.4(5) . . ? 
C78 C79 H79A 119.8 . . ? 
C74 C79 H79A 119.8 . . ? 
N91 N91 C92 120.5(3) 2 . ? 
N91 N91 Ag2 124.1(2) 2 . ? 
C92 N91 Ag2 111.7(3) . . ? 
N91 C92 C93 121.9(4) . . ? 
N91 C92 C96 116.2(5) . . ? 
C93 C92 C96 121.9(5) . . ? 
C96 N92 C98 119.7(4) . . ? 
C96 N92 Ag2 117.7(3) . . ? 
C98 N92 Ag2 122.4(3) . . ? 
C93 C93 C92 117.6(3) 2 . ? 
C93 C93 H93 121.2 2 . ? 
C92 C93 H93 121.2 . . ? 
N92 C96 C92 119.6(4) . . ? 
N92 C96 H96A 120.2 . . ? 
C92 C96 H96A 120.2 . . ? 
C99 C98 C103 121.4(5) . . ? 
C99 C98 N92 121.7(5) . . ? 
C103 C98 N92 116.9(4) . . ? 
C100 C99 C98 119.4(5) . . ? 
C100 C99 H99A 120.3 . . ? 
C98 C99 H99A 120.3 . . ? 
C101 C100 C99 120.4(5) . . ? 
C101 C100 H10B 119.8 . . ? 
C99 C100 H10B 119.8 . . ? 
C100 C101 C102 119.7(5) . . ? 
C100 C101 H10C 120.2 . . ? 
C102 C101 H10C 120.2 . . ? 
C101 C102 C103 121.5(6) . . ? 
C101 C102 H10D 119.2 . . ? 
C103 C102 H10D 119.2 . . ? 
C102 C103 C98 117.5(5) . . ? 
C102 C103 C104 119.1(5) . . ? 
C98 C103 C104 123.4(5) . . ? 
C109 C104 C105 117.6(5) . . ? 
C109 C104 C103 121.5(5) . . ? 
C105 C104 C103 120.9(5) . . ? 
C106 C105 C104 120.8(5) . . ? 
C106 C105 H10E 119.6 . . ? 
C104 C105 H10E 119.6 . . ? 
C107 C106 C105 120.5(6) . . ? 
C107 C106 H10F 119.8 . . ? 
C105 C106 H10F 119.8 . . ? 
C106 C107 C108 120.2(6) . . ? 
C106 C107 H10G 119.9 . . ? 
C108 C107 H10G 119.9 . . ? 
C107 C108 C109 119.5(5) . . ? 
C107 C108 H10H 120.3 . . ? 
C109 C108 H10H 120.3 . . ? 
C104 C109 C108 121.5(5) . . ? 
C104 C109 H10I 119.3 . . ? 
C108 C109 H10I 119.3 . . ? 
F11 B1 F16 114.3(10) . . ? 
F11 B1 F13 111.8(6) . . ? 
F16 B1 F13 99.7(11) . . ? 
F11 B1 F12 112.8(5) . . ? 
F16 B1 F12 14.6(11) . . ? 
F13 B1 F12 112.6(6) . . ? 
F11 B1 F15 115.7(8) . . ? 
F16 B1 F15 124.5(12) . . ? 
F13 B1 F15 39.2(7) . . ? 
F12 B1 F15 130.7(8) . . ? 
F11 B1 F14 106.7(6) . . ? 
F16 B1 F14 119.6(11) . . ? 
F13 B1 F14 104.1(4) . . ? 
F12 B1 F14 108.1(6) . . ? 
F15 B1 F14 65.6(8) . . ? 
F11 B1 F17 103.6(10) . . ? 
F16 B1 F17 106.1(13) . . ? 
F13 B1 F17 121.6(9) . . ? 
F12 B1 F17 92.9(9) . . ? 
F15 B1 F17 84.1(10) . . ? 
F14 B1 F17 19.0(8) . . ? 
F21 B2 F22 113.1(6) . . ? 
F21 B2 F23 115.2(7) . . ? 
F22 B2 F23 110.0(5) . . ? 
F21 B2 F24 104.3(4) . . ? 
F22 B2 F24 105.0(6) . . ? 
F23 B2 F24 108.4(6) . . ? 
F25 B21 F27 117.5(16) . . ? 
F25 B21 F26 127.9(16) . . ? 
F27 B21 F26 112.2(14) . . ? 
F25 B21 F28 79.5(12) . . ? 
F27 B21 F28 108.4(18) . . ? 
F26 B21 F28 99.4(16) . . ? 
B21 F25 F28 51.9(10) . . ? 
B21 F28 F25 48.6(7) . . ? 
 
loop_ 
 _geom_hbond_atom_site_label_D 
 _geom_hbond_atom_site_label_H 
 _geom_hbond_atom_site_label_A 
 _geom_hbond_distance_DH 
 _geom_hbond_distance_HA 
 _geom_hbond_distance_DA 
 _geom_hbond_angle_DHA 
 _geom_hbond_site_symmetry_A 
C63 H63 F25  0.95 1.75 2.546(13) 139.1 . 
 
_diffrn_measured_fraction_theta_max    0.998 
_diffrn_reflns_theta_full              26.37 
_diffrn_measured_fraction_theta_full   0.998 
_refine_diff_density_max    0.891 
_refine_diff_density_min   -0.614 
_refine_diff_density_rms    0.081 
